# Supplementary material for: Catalytic enantio- and diastereoselective Mannich reaction of α-substituted isocyanoacetates and ketimines
Source: Royal Society of Chemistry journal article supplement (doi:10.1039/c6cc04132a), 2016-01-01

## **SUPPORTING INFORMATION**

### **Catalytic Enantio- and Diastereoselective Mannich Reaction of $\alpha$ -Substituted Isocyanoacetates and Ketimines**

R. de la Campa, A. D. Gammack Yamagata, I. Ortín, A. Franchino, A. L. Thompson, B.  
Odell and D. J. Dixon\*

University of Oxford, Chemistry Research Laboratory, Mansfield Road 12, OX1 3TA,  
Oxford, United Kingdom

# Contents

|                                                                                                                                                                                            |    |
|--------------------------------------------------------------------------------------------------------------------------------------------------------------------------------------------|----|
| 1 General experimental .....                                                                                                                                                               | 6  |
| 2 Practical experimental .....                                                                                                                                                             | 8  |
| 2.1 Synthesis of starting materials and ligands .....                                                                                                                                      | 8  |
| 2.1.1 Synthesis and characterization of isopropyl 2-isocyanopropanoate <b>2b</b> .....                                                                                                     | 8  |
| 2.1.2 Synthesis and characterization of <i>tert</i> -butyl 2-isocyanopropanoate <b>2c</b> .....                                                                                            | 9  |
| 2.1.3 Synthesis and characterization of diphenylmethyl 2-isocyanopropanoate <b>2e</b> .....                                                                                                | 10 |
| 2.1.4 Synthesis and characterization of <i>tert</i> -butyl 2-isocyanobutanoate <b>2f</b> .....                                                                                             | 10 |
| 2.1.5 Synthesis and characterization of <i>tert</i> -butyl 2-isocyanohexanoate <b>2g</b> .....                                                                                             | 11 |
| 2.1.6 Synthesis and characterization of ligand <b>1d</b> .....                                                                                                                             | 13 |
| 2.1.7 Synthesis and characterization of ligand <b>1e</b> .....                                                                                                                             | 14 |
| 2.1.8 Synthesis and characterization of ligand <b>1f</b> .....                                                                                                                             | 14 |
| 2.1.9 Synthesis and characterization of ligand <b>1g</b> .....                                                                                                                             | 15 |
| 2.2 General procedure for the synthesis of racemic imidazolines <b>5</b> .....                                                                                                             | 17 |
| 2.3 General procedure A for the enantioselective synthesis of imidazolines <b>5</b> .....                                                                                                  | 17 |
| 2.4 General procedure B for the enantioselective synthesis of imidazolines <b>5</b> .....                                                                                                  | 18 |
| 2.4.1 Synthesis and characterization of (4 <i>S</i> ,5 <i>R</i> )-methyl-4,5-dimethyl-4-phenyl-4,5-dihydro-1 <i>H</i> -imidazole-5-carboxylate <b>5a</b> .....                             | 18 |
| 2.4.2 Synthesis and characterization of (4 <i>S</i> ,5 <i>R</i> )-isopropyl-4,5-dimethyl-4-phenyl-4,5-dihydro-1 <i>H</i> -imidazole-5-carboxylate <b>5b</b> .....                          | 19 |
| 2.4.3 Synthesis and characterization of <i>tert</i> -butyl (4 <i>S</i> ,5 <i>R</i> )-4,5-dimethyl-4-phenyl-4,5-dihydro-1 <i>H</i> -imidazole-5-carboxylate <b>5c</b> .....                 | 19 |
| 2.4.4 Synthesis and characterization of (4 <i>S</i> ,5 <i>R</i> )-benzyl-4,5-dimethyl-4-phenyl-4,5-dihydro-1 <i>H</i> -imidazole-5-carboxylate <b>5d</b> .....                             | 19 |
| 2.4.5 Synthesis and characterization of (4 <i>S</i> ,5 <i>R</i> )-diphenylmethyl-4,5-dimethyl-4-phenyl-4,5-dihydro-1 <i>H</i> -imidazole-5-carboxylate <b>5e</b> .....                     | 20 |
| 2.4.6 Synthesis and characterization of <i>tert</i> -butyl (4 <i>S</i> ,5 <i>R</i> )-4,5-dimethyl-4-( <i>p</i> -tolyl)-4,5-dihydro-1 <i>H</i> -imidazole-5-carboxylate <b>5f</b> .....     | 20 |
| 2.4.7 Synthesis and characterization of <i>tert</i> -butyl (4 <i>S</i> ,5 <i>R</i> )-4-([1,1'-biphenyl]-4-yl)-4,5-dimethyl-4,5-dihydro-1 <i>H</i> -imidazole-5-carboxylate <b>5g</b> ..... | 21 |

|                                                                                                                                                                                            |    |
|--------------------------------------------------------------------------------------------------------------------------------------------------------------------------------------------|----|
| 2.4.8 Synthesis and characterization of <i>tert</i> -butyl (4 <i>S</i> ,5 <i>R</i> )-4-(4-fluorophenyl)-4,5-dimethyl-4,5-dihydro-1 <i>H</i> -imidazole-5-carboxylate <b>5h</b> .....       | 21 |
| 2.4.9 Synthesis and characterization of <i>tert</i> -butyl (4 <i>S</i> ,5 <i>R</i> )-4-(4-chlorophenyl)-4,5-dimethyl-4,5-dihydro-1 <i>H</i> -imidazole-5-carboxylate <b>5i</b> .....       | 22 |
| 2.4.10 Synthesis and characterization of <i>tert</i> -butyl (4 <i>S</i> ,5 <i>R</i> )-4-(4-methoxyphenyl)-4,5-dimethyl-4,5-dihydro-1 <i>H</i> -imidazole-5-carboxylate <b>5j</b> .....     | 22 |
| 2.4.11 Synthesis and characterization of <i>tert</i> -butyl (4 <i>S</i> ,5 <i>R</i> )-4-(3-chlorophenyl)-4,5-dimethyl-4,5-dihydro-1 <i>H</i> -imidazole-5-carboxylate <b>5k</b> .....      | 22 |
| 2.4.12 Synthesis and characterization of <i>tert</i> -butyl (4 <i>S</i> ,5 <i>R</i> )-4-(2-fluorophenyl)-4,5-dimethyl-4,5-dihydro-1 <i>H</i> -imidazole-5-carboxylate <b>5l</b> .....      | 23 |
| 2.4.13 Synthesis and characterization of <i>tert</i> -butyl (4 <i>S</i> ,5 <i>R</i> )-4,5-dimethyl-4-(pyridin-3-yl)-4,5-dihydro-1 <i>H</i> -imidazole-5-carboxylate <b>5m</b> .....        | 23 |
| 2.4.14 Synthesis and characterization of <i>tert</i> -butyl (4 <i>R</i> ,5 <i>R</i> )-4-(furan-2-yl)-4,5-dimethyl-4,5-dihydro-1 <i>H</i> -imidazole-5-carboxylate <b>5n</b> .....          | 24 |
| 2.4.15 Synthesis and characterization of <i>tert</i> -butyl (4 <i>S</i> ,5 <i>R</i> )-4,5-dimethyl-4-phenethyl-4,5-dihydro-1 <i>H</i> -imidazole-5-carboxylate <b>5o</b> .....             | 24 |
| 2.4.16 Synthesis and characterization of <i>tert</i> -butyl (4 <i>S</i> ,5 <i>R</i> )-5-ethyl-4-methyl-4-phenyl-4,5-dihydro-1 <i>H</i> -imidazole-5-carboxylate <b>5p</b> .....            | 24 |
| 2.4.17 Synthesis and characterization of <i>tert</i> -butyl (4 <i>S</i> ,5 <i>R</i> )-4-(4-chlorophenyl)-5-ethyl-4-methyl-4,5-dihydro-1 <i>H</i> -imidazole-5-carboxylate <b>5q</b> .....  | 25 |
| 2.4.18 Synthesis and characterization of <i>tert</i> -butyl (4 <i>S</i> ,5 <i>R</i> )-5-ethyl-4-(4-methoxyphenyl)-4-methyl-4,5-dihydro-1 <i>H</i> -imidazole-5-carboxylate <b>5r</b> ..... | 25 |
| 2.4.19 Synthesis and characterization of <i>tert</i> -butyl (4 <i>R</i> ,5 <i>R</i> )-5-ethyl-4-(furan-2-yl)-4-methyl-4,5-dihydro-1 <i>H</i> -imidazole-5-carboxylate <b>5s</b> .....      | 26 |
| 2.4.20 Synthesis and characterization of <i>tert</i> -butyl (4 <i>S</i> ,5 <i>R</i> )-5-butyl-4-methyl-4-phenyl-4,5-dihydro-1 <i>H</i> -imidazole-5-carboxylate <b>5t</b> .....            | 26 |
| 2.4.21 Synthesis and characterization of <i>tert</i> -butyl (4 <i>S</i> ,5 <i>R</i> )-5-butyl-4-(4-fluorophenyl)-4-methyl-4,5-dihydro-1 <i>H</i> -imidazole-5-carboxylate <b>5u</b> .....  | 26 |
| 2.4.22 Synthesis and characterization of <i>tert</i> -butyl (4 <i>S</i> ,5 <i>R</i> )-5-butyl-4-(4-chlorophenyl)-4-methyl-4,5-dihydro-1 <i>H</i> -imidazole-5-carboxylate <b>5v</b> .....  | 27 |
| 2.4.23 Synthesis and characterization of <i>tert</i> -butyl (4 <i>R</i> ,5 <i>R</i> )-5-butyl-4-(furan-2-yl)-4-methyl-4,5-dihydro-1 <i>H</i> -imidazole-5-carboxylate <b>5w</b> .....      | 27 |
| 2.4.24 Synthesis and characterization of methyl (4 <i>S</i> ,5 <i>R</i> )-4,5-dimethyl-4-( <i>p</i> -tolyl)-4,5-dihydro-1 <i>H</i> -imidazole-5-carboxylate <b>5y</b> .....                | 28 |
| 2.5 Synthesis of imidazoline derivatives.....                                                                                                                                              | 29 |

|                                                                                                            |    |
|------------------------------------------------------------------------------------------------------------|----|
| 2.5.1 Synthesis of (2 <i>R</i> ,3 <i>S</i> )- 2,3-diamino-2-methyl-3-phenylbutanoic acid <b>6c</b> .....   | 29 |
| 3 <sup>1</sup> H-NMR and <sup>13</sup> C-NMR of starting materials and ligands.....                        | 30 |
| 3.1 <sup>1</sup> H-NMR and <sup>13</sup> C-NMR of isopropyl <i>N</i> -formylalanine <b>2b'</b> .....       | 30 |
| 3.2 <sup>1</sup> H-NMR and <sup>13</sup> C-NMR of isopropyl 2-isocyanopropanoate <b>2b</b> .....           | 31 |
| 3.3 <sup>1</sup> H-NMR and <sup>13</sup> C-NMR of <i>tert</i> -butyl 2-isocyanopropanoate <b>2c</b> .....  | 32 |
| 3.4 <sup>1</sup> H-NMR and <sup>13</sup> C-NMR of diphenylmethyl <i>N</i> -formylalanine <b>2e'</b> .....  | 33 |
| 3.5 <sup>1</sup> H-NMR and <sup>13</sup> C-NMR of diphenylmethyl 2-isocyanopropanoate <b>2e</b> .....      | 34 |
| 3.6 <sup>1</sup> H-NMR and <sup>13</sup> C-NMR of <i>tert</i> -butyl 2-formamidobutanoate <b>2f'</b> ..... | 35 |
| 3.7 <sup>1</sup> H-NMR and <sup>13</sup> C-NMR of <i>tert</i> -butyl 2-isocyanobutanoate <b>2f</b> .....   | 36 |
| 3.8 <sup>1</sup> H-NMR and <sup>13</sup> C-NMR of <i>ter-t</i> butyl 2-isocyanohaxanoate <b>2g</b> .....   | 37 |
| 3.9 <sup>1</sup> H-NMR and <sup>13</sup> C-NMR of ligand <b>1d</b> .....                                   | 38 |
| 3.10 <sup>1</sup> H-NMR and <sup>13</sup> C-NMR of ligand <b>1e</b> .....                                  | 39 |
| 3.11 <sup>1</sup> H-NMR and <sup>13</sup> C-NMR of ligand <b>1f</b> .....                                  | 40 |
| 3.12 <sup>1</sup> H-NMR and <sup>13</sup> C-NMR of ligand <b>1g</b> .....                                  | 41 |
| 4 <sup>1</sup> H-NMR, <sup>13</sup> C-NMR, NOE and HPLC traces of imidazolines <b>5</b> .....              | 42 |
| 4.1 <sup>1</sup> H-NMR, <sup>13</sup> C-NMR and HPLC traces of imidazoline <b>5a</b> .....                 | 42 |
| 4.2 <sup>1</sup> H-NMR, <sup>13</sup> C-NMR and HPLC traces of imidazoline <b>5b</b> .....                 | 44 |
| 4.3 <sup>1</sup> H-NMR, <sup>13</sup> C-NMR and HPLC traces of imidazoline <b>5c</b> .....                 | 46 |
| 4.4 <sup>1</sup> H-NMR, <sup>13</sup> C-NMR and HPLC traces of imidazoline <b>5d</b> .....                 | 48 |
| 4.5 <sup>1</sup> H-NMR, <sup>13</sup> C-NMR and HPLC traces of imidazoline <b>5e</b> .....                 | 50 |
| 4.6 <sup>1</sup> H-NMR, <sup>13</sup> C-NMR, NOE and HPLC traces of imidazoline <b>5f</b> .....            | 52 |
| 4.7 <sup>1</sup> H-NMR, <sup>13</sup> C-NMR and HPLC traces of imidazoline <b>5g</b> .....                 | 55 |
| 4.8 <sup>1</sup> H-NMR, <sup>13</sup> C-NMR and HPLC traces of imidazoline <b>5h</b> .....                 | 57 |
| 4.9 <sup>1</sup> H-NMR, <sup>13</sup> C-NMR and HPLC traces of imidazoline <b>5i</b> .....                 | 59 |
| 4.10 <sup>1</sup> H-NMR, <sup>13</sup> C-NMR and HPLC traces of imidazoline <b>5j</b> .....                | 61 |
| 4.11 <sup>1</sup> H-NMR, <sup>13</sup> C-NMR and HPLC traces of imidazoline <b>5k</b> .....                | 63 |
| 4.12 <sup>1</sup> H-NMR, <sup>13</sup> C-NMR and HPLC traces of imidazoline <b>5l</b> .....                | 65 |
| 4.13 <sup>1</sup> H-NMR, <sup>13</sup> C-NMR and HPLC traces of imidazoline <b>5m</b> .....                | 67 |
| 4.14 <sup>1</sup> H-NMR, <sup>13</sup> C-NMR and HPLC traces of imidazoline <b>5n</b> .....                | 69 |
| 4.15 <sup>1</sup> H-NMR, <sup>13</sup> C-NMR and HPLC traces of imidazoline <b>5o</b> .....                | 71 |
| 4.16 <sup>1</sup> H-NMR, <sup>13</sup> C-NMR and HPLC traces of imidazoline <b>5p</b> .....                | 73 |
| 4.17 <sup>1</sup> H-NMR, <sup>13</sup> C-NMR, NOE and HPLC traces of imidazoline <b>5q</b> .....           | 75 |
| 4.18 <sup>1</sup> H-NMR, <sup>13</sup> C-NMR and HPLC traces of imidazoline <b>5r</b> .....                | 78 |
| 4.19 <sup>1</sup> H-NMR, <sup>13</sup> C-NMR and HPLC traces of imidazoline <b>5s</b> .....                | 80 |
| 4.20 <sup>1</sup> H-NMR, <sup>13</sup> C-NMR and HPLC traces of imidazoline <b>5t</b> .....                | 82 |

|                                                                                                  |    |
|--------------------------------------------------------------------------------------------------|----|
| 4.21 $^1\text{H}$ -NMR, $^{13}\text{C}$ -NMR and HPLC traces of imidazoline <b>5u</b> .....      | 84 |
| 4.22 $^1\text{H}$ -NMR, $^{13}\text{C}$ -NMR, NOE and HPLC traces of imidazoline <b>5v</b> ..... | 86 |
| 4.23 $^1\text{H}$ -NMR, $^{13}\text{C}$ -NMR and HPLC traces of imidazoline <b>5w</b> .....      | 89 |
| 4.24 $^1\text{H}$ -NMR, $^{13}\text{C}$ -NMR and HPLC traces of imidazoline <b>5y</b> .....      | 91 |
| 5 $^1\text{H}$ -NMR and $^{13}\text{C}$ -NMR of imidazoline derivatives .....                    | 93 |
| 5.1 $^1\text{H}$ -NMR and $^{13}\text{C}$ -NMR of <b>6c</b> .....                                | 93 |
| 6 NMR studies of <b>1a</b> ·AgOAc complex .....                                                  | 94 |
| 6.1 $^1\text{H}$ -NMR spectra .....                                                              | 94 |
| 6.2 $^{31}\text{P}$ -NMR spectra .....                                                           | 96 |
| 7 Proposed reaction mechanism.....                                                               | 97 |
| 8 X-Ray data for the crystal of complex <b>1a</b> ·AgOAc.....                                    | 98 |

## 1 General experimental

All non-aqueous reactions were performed with magnetic stirring using oven-dried glassware under a positive pressure of nitrogen. Yields refer to spectroscopically pure compounds.

All reagents bought from commercial sources were used as received. Organic solvents were evaporated under reduced pressure using a Büchi rotary evaporator. All solvents were commercially supplied or dried by filtration through activated alumina (powder ~150 mesh, pore size 58 Å, basic, Sigma-Aldrich) columns. Petrol ether (PE) refers to distilled light petroleum of fraction 30 - 40 °C. Ethyl acetate used for the preparation of imidazolines was dried and stored over 4 Å MS.

All reactions were followed by thin-layer chromatography (TLC) when practical, using Merck Kieselgel 60 F<sub>254</sub> fluorescent treated silica. Visualisation was accomplished under UV light ( $\lambda_{\text{max}} = 254 \text{ nm}$ ) and by staining with aqueous potassium permanganate alkaline solution or vanillin staining dip (prepared by adding 2.5 mL of concentrated H<sub>2</sub>SO<sub>4</sub> to a solution of 15 g of vanillin in 250 mL EtOH 95%). Chromatographic purification was performed on VWR 60 silica gel 40-63  $\mu\text{m}$  using HPLC grade solvents that were used as supplied.

Enantiomeric excesses were determined by analytical high performance liquid chromatography (HPLC) performed on an Agilent Technologies 1200 Series or 1260 Infinity Series systems using the chiral stationary phase column specified in the individual experiment and comparing the sample with the appropriate racemic mixture.

The enantiomeric excess of the imidazolines was measured after removal of the diphenylphosphinoyl (DPP) group.

Melting points were obtained on a Leica Galen III Hot-stage microscope apparatus equipped with a digital thermometer and are reported as uncorrected.

High resolution mass spectra (HRMS) were recorded by the University of Oxford mass spectrometry staff on a Bruker Daltonics MicroTOF mass spectrometer equipped with an ESI source or on a Micromass GCT equipped with an EI source unless otherwise specified.

Infrared absorption spectra (IR) were recorded on a Bruker Tensor 27 FT-IR spectrometer from a thin film (the sample was dissolved in CHCl<sub>3</sub> and the solvent evaporated) on a diamond ATR module. Only selected bands ( $\nu_{\text{max}}$ ) are reported in wavenumbers (cm<sup>-1</sup>).

NMR spectra were recorded on Bruker spectrometers operating at 400 or 500 MHz (<sup>1</sup>H resonance). Proton chemical shifts ( $\delta$ ) are given in parts per million (ppm) relative to tetramethylsilane (TMS) with the solvent resonance as internal standard:<sup>1</sup> CDCl<sub>3</sub>,  $\delta = 7.26 \text{ ppm}$ ; D<sub>2</sub>O,  $\delta = 4.79 \text{ ppm}$ . The following abbreviations are used to describe spin multiplicity: s = singlet, d = doublet, t = triplet, q = quartet, dd = doublet of doublets, dt = doublet of triplets, m =

---

<sup>1</sup> G. R. Fulmer, A. J. M. Miller, N. H. Sherden, H. E. Gottlieb, A. Nudelman, B. M. Stoltz, J. E. Bercaw, K. I. Goldberg, *Organometallics* **2010**, *29*, 2176–2179.

multiplet, br = broad signal. Coupling constants ( $J$ ) are given in Hertz (Hz).  $^{13}\text{C}$ -NMR spectra were recorded with complete proton decoupling. Carbon chemical shifts are reported in ppm ( $\delta$ ) relative to TMS with the solvent resonance as internal standard:<sup>1</sup>  $\text{CDCl}_3$ ,  $\delta = 77.16$  ppm;  $\text{CD}_2\text{Cl}_2$ ,  $\delta = 53.84$  ppm. Two-dimensional NMR spectroscopy experiments (COSY, HSQC and HMBC) were used where appropriate to assist in the assignment of signals in  $^1\text{H}$  and  $^{13}\text{C}$  spectra and data are not reported. NOE  $^1\text{H}$ -NMR spectra for imidazolines **5f**, **5o**, **5q** and **5v** were acquired to determine the relative stereochemistry (*trans*, see below for copies of spectra).

Optical rotations were recorded using a Schmidt Haensch UniPol polarimeter.  $[\alpha]_{\text{D}}^{\text{T}}$  values, reported in  $10^{-1} \text{ deg cm}^2 \text{ g}^{-1}$ , are calculated on the average value of ten consecutive readings. Concentrations ( $c$ ) are quoted in g/100 mL with the appropriate number of significant figures; D refers to the D-line of sodium (589 nm); temperatures (T) are given in degrees Celsius ( $^{\circ}\text{C}$ ).

Single crystal X-ray diffraction data were collected at 150 K with an Oxford Diffraction SuperNova diffractometer and processed with CrysAlisPro as per the SI (CIF). The structure was solved with SIR92<sup>16</sup> and refined with CRYSTALS.<sup>17</sup> Full crystallographic data (in CIF format) is available as ESI and can be obtained from The Cambridge Crystallographic Data Centre at [www.ccdc.cam.ac.uk/data\\_request/cif](http://www.ccdc.cam.ac.uk/data_request/cif) (reference number CCDC 1493438).

## 2 Practical experimental

### 2.1 Synthesis of starting materials and ligands

Ligands **1a**,<sup>2</sup> **1b**<sup>2</sup> and **1c**<sup>3</sup> were synthesized following literature procedures from quinine, quinidine and cinchonidine, respectively. The other ligands were prepared in a similar fashion (see below for procedure and full characterization).

Isocynoacetates **2a** and **2d** were prepared by dehydration of the corresponding *N*-formyl precursor following literature procedures.<sup>4</sup> The other isocynoacetates were prepared in a similar fashion (see below for procedure and full characterization).

*N*-Diphenylphosphinoyl imines **3a-3k** were prepared from the corresponding ketones *via* the oximes according to the literature.<sup>5</sup> The physical and spectroscopical data of ketimines **3a**,<sup>6</sup> **3b**,<sup>7</sup> **3c**,<sup>8</sup> **3d**,<sup>9</sup> **3e**,<sup>7</sup> **3f**,<sup>6</sup> **3g**,<sup>6</sup> **3h**,<sup>8</sup> **3i**,<sup>6</sup> **3j**<sup>6</sup> and **3k**<sup>7</sup> were in agreement with those reported.

#### 2.1.1 Synthesis and characterization of isopropyl 2-isocyanopropanoate **2b**

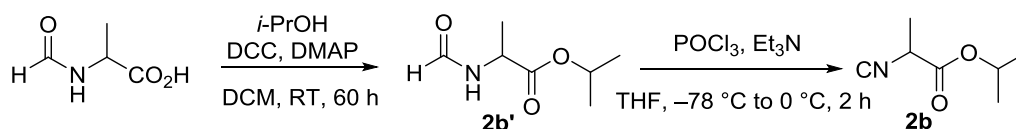

To a solution of isopropyl alcohol (0.67 mL, 8.8 mmol, 1 equiv) and *N*-formylalanine (1.30 g, 11.1 mmol, 1.2 equiv) in dry dichloromethane (80 mL) at 0 °C were added DCC (1.82 g, 8.80 mmol, 1 equiv) and DMAP (1.18 g, 9.65 mmol, 1.1 equiv). The mixture was warmed to room temperature and stirred for 60 hours. The mixture was filtered, washed with water (40 mL) and brine (40 mL), dried over anhydrous sodium sulphate, filtered again and concentrated under reduced pressure. The crude was purified by flash column chromatography using 4:6 PE:AcOEt, obtaining isopropyl *N*-formylalanine **2b'** as a colorless oil in 61% yield (856 mg).

**IR** (film)  $\nu = 3294, 2983, 1734, 1661, 1525, 1454, 1377, 1204, 1106 \text{ cm}^{-1}$ ; **<sup>1</sup>H-NMR** (400 MHz, CDCl<sub>3</sub>)  $\delta$  8.13 (s, 1H, CHO), 6.95 (brs, 1H, NH), 5.00 (sept,  $J = 6.0 \text{ Hz}$ , 1H, CH-(CH<sub>3</sub>)<sub>2</sub>), 4.56 (d,  $J = 7.2 \text{ Hz}$ , 1H, CH-CH<sub>3</sub>), 1.37 (d,  $J = 7.2 \text{ Hz}$ , 3H, CH-CH<sub>3</sub>), 1.22 (d,  $J = 6.0 \text{ Hz}$ , 3H, CH-(CH<sub>3</sub>)<sub>2</sub>), 1.21 (d,  $J = 6.0 \text{ Hz}$ , 3H, CH-(CH<sub>3</sub>)<sub>2</sub>); **<sup>13</sup>C-NMR** (100 MHz, CDCl<sub>3</sub>)  $\delta$  172.1 (C=O), 160.8 (CHO), 69.2 (CH-(CH<sub>3</sub>)<sub>2</sub>), 46.9 (CH-CH<sub>3</sub>), 21.6 (CH-(CH<sub>3</sub>)<sub>2</sub>), 21.5 (CH-(CH<sub>3</sub>)<sub>2</sub>), 18.2 (CH-CH<sub>3</sub>); **HRMS** (ESI): calcd. for C<sub>7</sub>H<sub>13</sub>NNaO<sub>3</sub><sup>+</sup> [M+Na]<sup>+</sup> 182.0788, found 182.0785.

A solution of isopropyl *N*-formylalanine **2b'** (856 mg, 5.38 mmol, 1 equiv) in dry THF (8 mL) was cooled to -78 °C and Et<sub>3</sub>N (3.7 mL, 26.9 mmol, 5 equiv) was added. Then, a solution of

<sup>2</sup> R. de la Campa, I. Ortín, D. J. Dixon, *Angew. Chem. Int. Ed.* **2014**, *54*, 4895–4898.

<sup>3</sup> F. Sladojevich, A. Trabocchi, A. Guarna, D. J. Dixon, *J. Am. Chem. Soc.*, **2011**, *133*, 1710–1713.

<sup>4</sup> (a) N. Elders, R. F. Schmitz, F. J. J. de Kanter, E. Ruijter, M. B. Groen, Romano V. A. Orru, *J. Org. Chem.* **2007**, *72*, 6135–6142; (b) J. Zhu, X. Wu, S. J. Danishefsky, *Tetrahedron Letters*, **2009**, *50*, 577–579.

<sup>5</sup> B. Krzyzanowska, W. J. Stec, *Synthesis* **1982**, 270.

<sup>6</sup> Y.-J. Chen, C. Chen, *Tetrahedron: Asymmetry*, **2008**, *19*, 2201–2209.

<sup>7</sup> S. Masumoto, H. Usuda, M. Suzuki, M. Kanai, M. Shibasaki, *J. Am. Chem. Soc.*, **2003**, *125*, 5634–5635.

<sup>8</sup> M. G. Núñez, A. J. M. Farley, D. J. Dixon, *J. Am. Chem. Soc.* **2013**, *135*, 16348–16351.

<sup>9</sup> I. Ortín, D. J. Dixon, *Angew. Chem. Int. Ed.* **2014**, *53*, 3462–3465.



POCl<sub>3</sub> (0.65 mL, 6.72 mmol, 1.25 equiv) in THF (8 mL) was added dropwise at -78 °C. The mixture was gently warmed to 0 °C, stirred for 2 hours, poured into cool water (10 mL) and extracted with diethyl ether (2 × 10 mL). The combined organic phases were washed with brine (10 mL), dried over anhydrous sodium sulphate, filtered and concentrated under reduced pressure. Compound **2b** was obtained as a yellow oil in 92% yield (695 mg) and was used without further purification.

**IR** (film)  $\nu$  = 2983, 2936, 2144, 1743, 1677, 1454, 1212, 1105 cm<sup>-1</sup>; **<sup>1</sup>H-NMR** (500 MHz, CDCl<sub>3</sub>)  $\delta$  5.07 (sept,  $J$  = 6.3 Hz, 1H, CH-(CH<sub>3</sub>)<sub>2</sub>), 4.27 (q,  $J$  = 7.1 Hz, 1H, CH), 1.62 (d,  $J$  = 7.1 Hz, 3H, CH<sub>3</sub>), 1.29 (d,  $J$  = 6.3 Hz, 3H, CH-(CH<sub>3</sub>)<sub>2</sub>), 1.28 (d,  $J$  = 6.3 Hz, 3H, CH-(CH<sub>3</sub>)<sub>2</sub>); **<sup>13</sup>C-NMR** (125 MHz, CDCl<sub>3</sub>)  $\delta$  166.7 (C=O), 159.3 (C≡N), 70.8 (CH-(CH<sub>3</sub>)<sub>2</sub>), 52.0 (CH), 21.6 (CH-(CH<sub>3</sub>)<sub>2</sub>), 19.4 (CH<sub>3</sub>); **HRMS** (ESI): calcd. for C<sub>7</sub>H<sub>11</sub>NNaO<sub>2</sub><sup>+</sup> [M+Na]<sup>+</sup> 164.0682, found 164.0688.

### 2.1.2 Synthesis and characterization of *tert*-butyl 2-isocyanopropanoate **2c**<sup>10</sup>

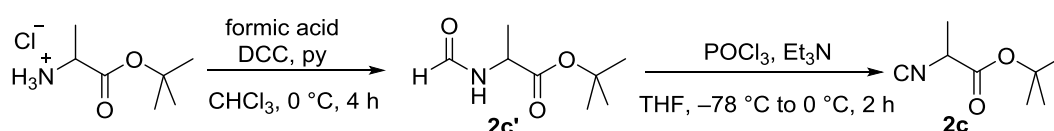

A 2 M solution of formic acid (3.77 mL in 12.5 mL of chloroform) was added dropwise to a stirred solution of DCC (2.57 g, 12.4 mmol, 2 equiv) in chloroform (15 mL) at 0 °C. The mixture was stirred at 0 °C for 5 minutes, then added over 30 minutes to a solution of alanine hydrochloride *tert*-butyl ester (1.13 g, 6.22 mmol, 1 equiv) in pyridine (15.5 mL) at 0 °C. The reaction mixture was stirred at 0 °C for 4 hours, then volatiles were removed under vacuum. Diethyl ether is added to the residue and the suspension is filtered. The filtrate is concentrated under vacuum and purified by FCC (PE:EA 1:1) obtaining **2c'** as a colorless oil in 93% yield (999 mg, data in agreement with the literature).<sup>11</sup>

A solution of *tert*-butyl *N*-formylalanine **2c'** (967 mg, 5.58 mmol, 1 equiv) in dry THF (7 mL) was cooled to -78 °C and Et<sub>3</sub>N (3.9 mL, 27.9 mmol, 5 equiv) was added. Then, a solution of POCl<sub>3</sub> (0.68 mL, 6.98 mmol, 1.25 equiv) in THF (4 mL) was added dropwise at -78 °C. The mixture was gently warmed to 0 °C, stirred for 2 hours, poured into cool water (10 mL) and extracted with diethyl ether (2 × 10 mL). The combined organic phases were washed with brine (10 mL), dried over anhydrous sodium sulphate, filtered and concentrated under reduced pressure. Compound **2c** was obtained as a yellow oil in 92% yield (853 mg) and was used without further purification.

**IR** (film)  $\nu$  = 2983, 2143, 1745, 1456, 1371, 1294, 1226, 1156, 1117, 1082, 1029, 850, 835 cm<sup>-1</sup>; **<sup>1</sup>H-NMR** (400 MHz, CDCl<sub>3</sub>)  $\delta$  4.20 (q,  $J$  = 7.1 Hz, 1H, CH), 1.60 (d,  $J$  = 7.1 Hz, 3H, CH<sub>3</sub>), 1.50 (s, 9H, C(CH<sub>3</sub>)<sub>3</sub>); **<sup>13</sup>C-NMR** (100 MHz, CDCl<sub>3</sub>)  $\delta$  166.2 (C=O), 158.9 (C≡N), 83.7 (C(CH<sub>3</sub>)<sub>3</sub>), 52.5 (t,  $J$  = 7.5 Hz, CH), 27.8 (C(CH<sub>3</sub>)<sub>3</sub>), 19.4 (CH<sub>3</sub>); **HRMS** (ammonia CI): calcd. for C<sub>8</sub>H<sub>17</sub>N<sub>2</sub>O<sub>2</sub><sup>+</sup> [M+NH<sub>4</sub>]<sup>+</sup> 173.1285, found  $m/z$  173.1286.

<sup>10</sup> Previously made by alkylation of *tert*-butyl isocynoacetate, characterization not reported: U. Schöllkopf, D. Hoppe, R. Jentsch, *Angew. Chem.* **1971**, *83*, 357–358.

<sup>11</sup> Y. Zhang, M. L. Blackman, A. B. Leduc, T. F. Jamison, *Angew. Chem., Int. Ed.* **2013**, *52*, 4251–4255.

### 2.1.3 Synthesis and characterization of diphenylmethyl 2-isocyanopropanoate **2e**

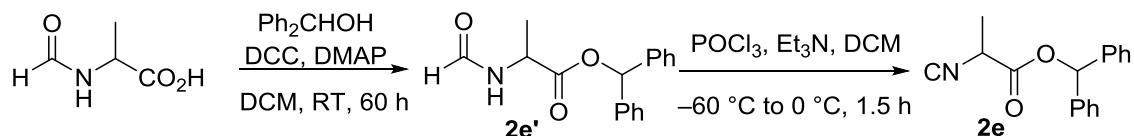

To a solution of diphenylmethanol (1.62 g, 8.80 mmol, 1 equiv) and *N*-formylalanine (1.30 g, 11.1 mmol, 1.26 equiv) in dry dichloromethane (80 mL) at  $0\text{ }^\circ\text{C}$  were added DCC (1.82 g, 8.80 mmol, 1 equiv) and DMAP (1.18 g, 9.65 mmol, 1.1 equiv). The mixture was warmed to room temperature and stirred for 60 hours. The mixture was filtered, washed with water (40 mL) and brine (40 mL), dried over anhydrous sodium sulphate, filtered again and concentrated under reduced pressure. The crude was purified by flash column chromatography using 1:1 PE:AcOEt, obtaining compound **2e'** as a white solid in 47% yield (1172 mg).

**M.p.**  $73 - 74\text{ }^\circ\text{C}$ ; **IR** (film)  $\nu = 3295, 3033, 1740, 1662, 1496, 1451, 1182, 1130, 738, 696\text{ cm}^{-1}$ ;  **$^1\text{H-NMR}$**  (400 MHz,  $\text{CDCl}_3$ )  $\delta$  8.15 (s, 1H, CHO), 7.45 – 7.30 (m, 10H, ArH), 6.96 (s, 1H, CHPh<sub>2</sub>), 6.85 (d,  $J = 7.1\text{ Hz}$ , 1H, NH), 4.87 (q,  $J = 7.1\text{ Hz}$ , 1H, CH-CH<sub>3</sub>), 1.51 (d,  $J = 7.1\text{ Hz}$ , 3H, CH-CH<sub>3</sub>);  **$^{13}\text{C-NMR}$**  (100 MHz,  $\text{CDCl}_3$ )  $\delta$  171.7 (C=O), 160.8 (CHO), 139.5 (CAr), 139.3 (CAr), 128.6 (CHAR), 128.6 (CHAR), 128.1 (CHAR), 127.0 (CHAR), 126.9 (CHAR), 78.1 (CHPh<sub>2</sub>), 46.8 (CH-CH<sub>3</sub>), 18.2 (CH-CH<sub>3</sub>); **HRMS** (ESI): calcd. for  $\text{C}_{17}\text{H}_{17}\text{NNaO}_3^+$  [M+Na]<sup>+</sup> 306.1101, found 306.1102.

A solution of diphenylmethyl *N*-formylalanine **2e'** (1.73 g, 6.11 mmol) in dry dichloromethane (20 mL) was cooled to  $-60\text{ }^\circ\text{C}$  and  $\text{Et}_3\text{N}$  (2.04 mL, 14.6 mmol, 2.4 equiv) was added. Then, the  $\text{POCl}_3$  (0.63 mL, 6.7 mmol, 1.1 equiv) was added dropwise at  $-60\text{ }^\circ\text{C}$  and the mixture was gently warmed to  $0\text{ }^\circ\text{C}$  and stirred for 1.5 hours. The reaction was quenched by adding a saturated solution of  $\text{Na}_2\text{CO}_3$  (5 mL), washed with water (30 mL) and brine (20 mL), dried over anhydrous sodium sulphate, filtered and concentrated under reduced pressure. The crude was purified by flash column chromatography using 8:2 PE:AcOEt, affording compound **2e** as a pale yellow solid in 82% yield (1330 mg).

**M.p.**  $57 - 58\text{ }^\circ\text{C}$ ; **IR** (film)  $\nu = 2143, 1748, 1687, 1496, 1452, 1183, 1114, 743, 696\text{ cm}^{-1}$ ;  **$^1\text{H-NMR}$**  (500 MHz,  $\text{CDCl}_3$ )  $\delta$  7.47 – 7.27 (m, 10H, CArH), 6.94 (s, 1H, CHPh<sub>2</sub>), 4.42 (q,  $J = 7.1\text{ Hz}$ , 1H, CH), 1.67 (d,  $J = 7.1\text{ Hz}$ , 3H, CH<sub>3</sub>);  **$^{13}\text{C-NMR}$**  (125 MHz,  $\text{CDCl}_3$ )  $\delta$  166.2 (C=O), 159.9 (C≡N), 139.1 (CAr), 128.8 (CHAR), 128.5 (CHAR), 127.1 (CHAR), 79.2 (CHPh<sub>2</sub>), 52.0 (CH), 19.4 (CH<sub>3</sub>); **HRMS** (ESI): calcd. for  $\text{C}_{17}\text{H}_{15}\text{NNaO}_2^+$  [M+Na]<sup>+</sup> 288.0995, found 288.0991.

### 2.1.4 Synthesis and characterization of *tert*-butyl 2-isocyanobutanoate **2f**

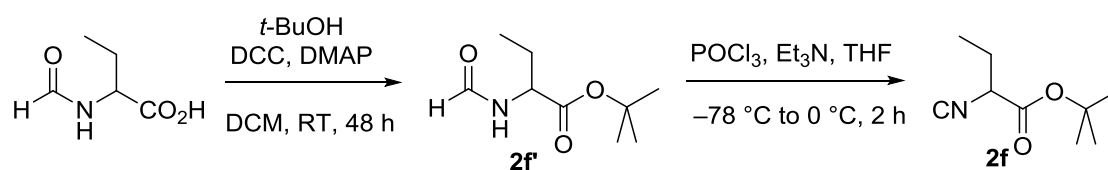

To a solution of *tert*-butyl alcohol (0.58 mL, 6.05 mmol, 1.02 equiv) and 2-formamidobutanoic acid (780 mg, 5.95 mmol, 1 equiv) in dry dichloromethane (10 mL) at  $0\text{ }^\circ\text{C}$  were added DCC

(1.37 g, 6.66 mmol, 1.13 equiv) and DMAP (743 mg, 6.05 mmol, 1.02 equiv). The mixture was warmed to room temperature and stirred for 48 hours. The solution was filtered, washed with water (10 mL) and brine (10 mL), dried over anhydrous sodium sulphate, filtered again and concentrated under reduced pressure. The crude was purified by flash column chromatography using 4:6 petroleum ether:ethyl acetate, affording compound **2f'** as a colorless oil in 22% yield (250 mg).

**IR** (film)  $\nu = 3287, 2976, 1736, 1665, 1529, 1460, 1369, 1161 \text{ cm}^{-1}$ ; **<sup>1</sup>H-NMR** (500 MHz, CDCl<sub>3</sub>)  $\delta$  8.21 (s, 1H, CHO), 6.19 (brs, 1H, NH), 4.55 (dd,  $J = 13.6, 5.7 \text{ Hz}$ , 1H, CH), 1.99 – 1.83 (m, 1H, CH<sub>2a</sub>), 1.81 – 1.64 (m, 1H, CH<sub>2b</sub>), 1.47 (s, 9H, C(CH<sub>3</sub>)<sub>3</sub>), 0.91 (t,  $J = 7.5 \text{ Hz}$ , 3H, CH<sub>3</sub>); **<sup>13</sup>C-NMR** (125 MHz, CDCl<sub>3</sub>)  $\delta$  171.3 (C=O), 160.6 (CHO), 82.5 (C(CH<sub>3</sub>)<sub>3</sub>), 52.5 (CH), 28.1 (C(CH<sub>3</sub>)<sub>3</sub>), 25.9 (CH<sub>2</sub>), 9.2 (CH<sub>3</sub>); **HRMS** (ESI): calcd. for C<sub>9</sub>H<sub>17</sub>NNaO<sub>3</sub><sup>+</sup> [M+Na]<sup>+</sup> 210.1101, found 210.1109.

A solution of compound **2f'** (217 mg, 1.16 mmol, 1 equiv) in dry THF (1.2 mL) was cooled to –78 °C and Et<sub>3</sub>N (0.80 mL, 5.8 mmol, 5 equiv) was added. Then, a solution of POCl<sub>3</sub> (140  $\mu$ L, 1.45 mmol, 1.25 equiv) in THF (1.2 mL) was added dropwise at –78 °C. The reaction mixture was gently warmed to 0 °C and stirred for 2 hours at 0 °C. The reaction mixture was poured into cool water (4 mL), extracted with diethyl ether (2  $\times$  5 mL), washed with brine (4 mL), dried over anhydrous sodium sulphate, filtered and concentrated under reduced pressure. The crude was purified by flash column chromatography using 3:1 petroleum ether:ethyl acetate, obtaining compound **2f** as a yellow oil in 94% yield (185 mg).

**IR** (film):  $\nu = 2980, 2147, 1747, 1370, 1253, 1155, 1126, 964, 839 \text{ cm}^{-1}$ ; **<sup>1</sup>H-NMR** (400 MHz, CDCl<sub>3</sub>):  $\delta$  4.11 (dd,  $J = 7.1, 5.1 \text{ Hz}$ , 1H, CH), 2.00 – 1.86 (m, 2H, CH<sub>2</sub>), 1.49 (s, 9H, C(CH<sub>3</sub>)<sub>3</sub>), 1.07 (t,  $J = 7.4 \text{ Hz}$ , 3H, CH<sub>3</sub>); **<sup>13</sup>C-NMR** (100 MHz, CDCl<sub>3</sub>):  $\delta$  165.7 (C=O), 159.3 (C $\equiv$ N), 83.7 (C(CH<sub>3</sub>)<sub>3</sub>), 58.7 (CH, t,  $^1J_{\text{CN}} = 7.6 \text{ Hz}$ ), 27.9 (C(CH<sub>3</sub>)<sub>3</sub>), 26.5 (CH<sub>2</sub>), 9.6 (CH<sub>3</sub>); **HRMS** (ammonia CI): calcd. for C<sub>9</sub>H<sub>19</sub>N<sub>2</sub>O<sub>2</sub><sup>+</sup> [M+NH<sub>4</sub>]<sup>+</sup> 187.1441, found  $m/z$  187.1443.

### 2.1.5 Synthesis and characterization of *tert*-butyl 2-isocyanoheptanoate **2g**

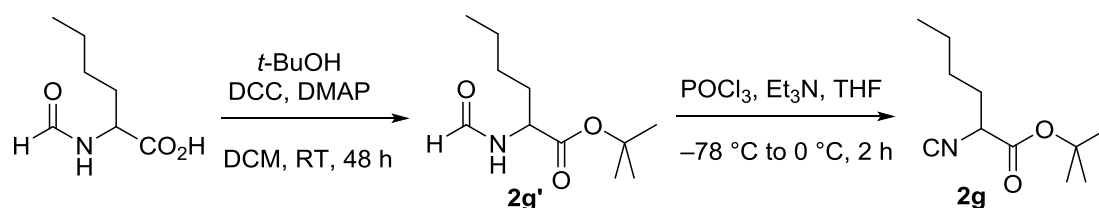

To a solution of *tert*-butyl alcohol (0.58 mL, 6.05 mmol, 1.04 equiv) and 2-formamidoheptanoic acid (930 mg, 5.84 mmol, 1.0 equiv) in dry dichloromethane (10 mL) at 0 °C were added DCC (1.37 g, 6.66 mmol, 1.13 equiv) and DMAP (743 mg, 6.05 mmol, 1.04 equiv). The mixture was warmed to room temperature and stirred for 48 hours. The solution was filtered, washed with water (10 mL) and brine (10 mL), dried over anhydrous sodium sulphate, filtered again and concentrated under reduced pressure. The crude was purified by flash column chromatography using 4:6 petroleum ether:ethyl acetate, affording compound **2g'** as a colorless oil in 69% yield (871 mg). A solution of *tert*-butyl 2-formamidoheptanoate **2g'** (249 mg, 1.16 mmol, 1 equiv) in dry THF (1.2 mL) was cooled to –78 °C and Et<sub>3</sub>N (0.80 mL, 5.8 mmol, 5 equiv) was added.

Then, POCl<sub>3</sub> (140 μL, 1.45 mmol, 1.25 equiv) in THF (1.2 mL) was added dropwise at -78 °C. The reaction mixture was gently warmed to 0 °C and stirred for 2 hours. The reaction mixture was poured into cool water (4 mL), extracted with diethyl ether (2 × 5 mL) washed with brine (4 mL), dried over anhydrous sodium sulphate, filtered and concentrated under reduced pressure. The crude was purified by flash column chromatography using 3:1 petroleum ether:ethyl acetate, affording compound **2g** as a yellow oil in 96% yield (219 mg).

**IR** (film):  $\nu = 2961, 2147, 1748, 1156 \text{ cm}^{-1}$ ; **<sup>1</sup>H-NMR** (400 MHz, CDCl<sub>3</sub>):  $\delta$  4.09 – 4.04 (m, 1H, CH), 1.83 – 1.78 (m, 2H, CHCH<sub>2</sub>), 1.43 (s, 9H, C(CH<sub>3</sub>)<sub>3</sub>), 1.41 – 1.14 (m, 4H, CH<sub>2</sub>CH<sub>2</sub>CH<sub>3</sub>), 0.87 (t,  $J = 8.0 \text{ Hz}$ , 3H, CH<sub>3</sub>); **<sup>13</sup>C-NMR** (100 MHz, CDCl<sub>3</sub>):  $\delta$  165.8 (C=O), 159.1 (C≡N), 83.6 (C(CH<sub>3</sub>)<sub>3</sub>), 57.4 (CH), 32.4 (CH<sub>2</sub>), 27.8 (C(CH<sub>3</sub>)<sub>3</sub>), 27.2 (CH<sub>2</sub>), 21.8 (CH<sub>2</sub>), 13.8 (CH<sub>3</sub>); **HRMS** (ESI): calcd. for C<sub>11</sub>H<sub>19</sub>NO<sub>2</sub>Na<sup>+</sup> [M+Na]<sup>+</sup> 220.1308, found  $m/z$  220.1309.

## 2.1.6 Synthesis and characterization of ligand **1d**

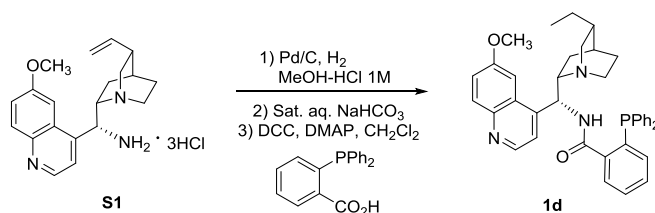

**S1** (585 g, 1.35 mmol) was dissolved in 8 mL of 2:1 MeOH/HCl 1M and 10% Pd/C (59 mg) was added. The reaction mixture was stirred under hydrogen (1 atm) for 7 h at room temperature and then filtered through Celite washing with water and MeOH. The filtrate was concentrated under reduced pressure and neutralized with sat. NaHCO<sub>3</sub>. The resultant solution was extracted several times with CH<sub>2</sub>Cl<sub>2</sub>. The combined CH<sub>2</sub>Cl<sub>2</sub> extracts were dried over Na<sub>2</sub>SO<sub>4</sub> and concentrated under reduced pressure to yield a colorless oil (400 mg, 1.23 mmol, 91% yield) which was dissolved in 12 mL of dry CH<sub>2</sub>Cl<sub>2</sub>. 2-(Diphenylphosphino)benzoic acid (452 mg, 1.47 mmol) and 4-dimethylaminopyridine (18 mg, 0.15 mmol) were added. The mixture was cooled to 0 °C, dicyclohexyl carbodiimide (280 mg, 1.35 mmol) was added and then the ice bath was removed and the resultant solution was stirred at room temperature for 12 h. After filtration, CH<sub>2</sub>Cl<sub>2</sub> was evaporated under reduced pressure and the residue was dissolved in EtOAc and washed with water, brine and dried over Na<sub>2</sub>SO<sub>4</sub>. The organic phase was concentrated under reduced pressure. Purification by flash column chromatography using EtOAc:MeOH 95:5 afforded product **1d** as a white solid in 46% yield (338 mg).

$[\alpha]_D^{25} = +52$  ( $c = 0.5$  in CHCl<sub>3</sub>). **M.p.** 155 – 156 °C; **IR** (film)  $\nu = 3210, 2954, 1647, 1620, 1509, 1472, 1327, 1244, 1230, 1027, 846, 744, 697$  cm<sup>-1</sup>; **<sup>1</sup>H-NMR** (500 MHz, CDCl<sub>3</sub>)  $\delta$  8.67 (d,  $J = 4.6$  Hz, 1H, CHAr), 7.97 (d,  $J = 9.2$  Hz, 1H, CHAr), 7.64 (d,  $J = 2.5$  Hz, 1H, CHAr), 7.59 – 7.47 (m, 1H, CHAr), 7.38 – 7.30 (m, 2H, CHAr), 7.30 – 7.25 (m, 2H, CHAr), 7.25 – 7.15 (m, 5H, CHAr), 7.12 (d,  $J = 3.4$  Hz, 1H, CHAr), 7.00 (dd,  $J = 11.8, 4.2$  Hz, 2H, CHAr), 6.94 (dd,  $J = 11.8, 4.2$  Hz, 2H, CHAr), 6.84 (ddd,  $J = 7.7, 4.2, 0.9$  Hz, 1H, CHAr), 6.07 (t,  $J = 10.1$  Hz, 1H, CH), 3.95 (s, 3H, OCH<sub>3</sub>), 3.25 (dd,  $J = 17.2, 9.1$  Hz, 1H, CH), 3.07 (dd,  $J = 13.4, 9.1$  Hz, 1H, CH<sub>2a</sub>), 2.89 – 2.72 (m, 1H, CH<sub>2b</sub>), 2.55 – 2.43 (m, 1H, CH<sub>2b'</sub>), 2.40 (d,  $J = 13.4$  Hz, 1H, CH<sub>2a'</sub>), 1.94 – 1.81 (m, 1H, CH<sub>2c</sub>), 1.81 – 1.64 (m, 2H, CH and CH<sub>2d</sub>), 1.53 (dd,  $J = 13.4, 7.1$  Hz, 1H, CH<sub>2c'</sub>), 1.47 – 1.31 (m, 4H, CH, CH<sub>2d'</sub>, CH<sub>2e</sub> and CH<sub>2e'</sub>), 0.93 (t,  $J = 7.1$  Hz, 3H, CH<sub>2</sub>CH<sub>3</sub>); **<sup>13</sup>C-NMR** (125 MHz, CDCl<sub>3</sub>)  $\delta$  168.8 (C=O), 158.2 (C-OCH<sub>3</sub>), 147.6 (CHAr), 145.1 (CAr), 143.9 (CAr), 141.3 (d,  $J = 26.9$  Hz, CAr), 136.4 (d,  $J = 10.8$  Hz, CAr), 136.2 (d,  $J = 11.0$  Hz, CAr), 134.9 (d,  $J = 20.7$  Hz, CAr), 134.3 (CHAr), 133.7 (d,  $J = 16.7$  Hz, CHAr), 133.6 (d,  $J = 16.6$  Hz, CHAr), 131.5 (CHAr), 130.6 (CHAr), 129.1 (CHAr), 129.0 (d,  $J = 8.9$  Hz, CHAr), 128.8 (d,  $J = 7.1$  Hz, CHAr), 128.7 (d,  $J = 7.2$  Hz, CHAr), 128.7 (CHAr), 128.6 (CHAr), 122.4 (CHAr), 119.1 (CHAr), 101.8 (CHAr), 57.8 (CH), 57.7 (CH<sub>2</sub>), 56.0 (OCH<sub>3</sub>), 50.1 (CH), 41.6 (CH<sub>2</sub>), 37.5 (CH), 28.2 (CH<sub>2</sub>), 27.9 (CH<sub>2</sub>), 25.5 (CH and CH<sub>2</sub>), 12.4 (CH<sub>3</sub>); **<sup>31</sup>P-NMR** (162 MHz, CDCl<sub>3</sub>)  $\delta$  -10.5 (brs). **HRMS** (ESI): calcd. for C<sub>39</sub>H<sub>41</sub>N<sub>3</sub>O<sub>2</sub>P<sup>+</sup> [M+H]<sup>+</sup> 614.2931, found  $m/z$  614.2933.

### 2.1.7 Synthesis and characterization of ligand 1e

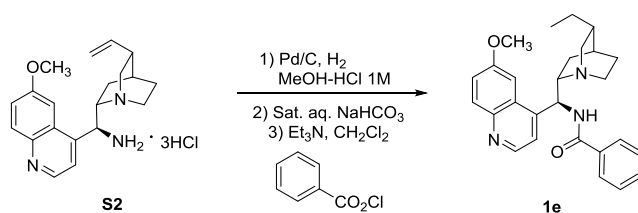

**S2** (850 mg, 1.96 mmol) was dissolved in 10 mL of 2:1 MeOH/HCl 1M and 10% Pd/C (85 mg) was added. The reaction mixture was stirred under hydrogen (1 atm) for 7 h at room temperature and then filtered through Celite washing with water and MeOH. The filtrate was concentrated under reduced pressure and neutralized with sat. NaHCO<sub>3</sub>. The resultant solution was extracted several times with CH<sub>2</sub>Cl<sub>2</sub>. The combined CH<sub>2</sub>Cl<sub>2</sub> extracts were dried over Na<sub>2</sub>SO<sub>4</sub> and concentrated under reduced pressure to yield a colorless oil (509 mg, 1.56 mmol, 80% yield) which was dissolved in 16 mL of dry CH<sub>2</sub>Cl<sub>2</sub>. Triethylamine (0.26 mL, 1.87 mmol) and benzoyl chloride (0.2 mL, 1.72 mmol) were added. The mixture was stirred at room temperature for 12 h. CH<sub>2</sub>Cl<sub>2</sub> was removed under reduced pressure. Purification by flash column chromatography using EtOAc:MeOH 8:2 afforded the product **1e** as a pale yellow solid in 46% yield (436 mg).

$[\alpha]_D^{25} = -145$  ( $c = 0.5$  in CHCl<sub>3</sub>). **M.p.** 90 – 91 °C; **IR** (film)  $\nu = 2930, 2962, 1621, 1509, 1475, 1262, 1230, 1029, 852, 829, 713$  cm<sup>-1</sup>; **<sup>1</sup>H-NMR** (500 MHz, CDCl<sub>3</sub>)  $\delta$  8.73 (d,  $J = 4.6$  Hz, 1H, CHAr), 8.03 (d,  $J = 9.2$  Hz, 1H, CHAr), 7.87 – 7.77 (m, 2H, CHAr), 7.73 (d,  $J = 2.6$  Hz, 1H, CHAr), 7.59 – 7.33 (m, 5H, CHAr), 5.37 (s, 1H, CH), 3.98 (s, 3H, OCH<sub>3</sub>), 3.27 (dd,  $J = 13.6, 9.9$  Hz, 1H, CH<sub>2a</sub>), 3.14 (dd,  $J = 20.5, 10.6$  Hz, 2H, CH and CH<sub>2b</sub>), 2.79 – 2.62 (m, 1H, CH<sub>2b</sub>), 2.47 (ddd,  $J = 13.6, 5.0, 2.2$  Hz, 1H, CH<sub>2a</sub>), 1.64 (dd,  $J = 15.9, 4.3$  Hz, 2H, CH and CH<sub>2c</sub>), 1.59 – 1.49 (m, 1H, CH<sub>2c</sub>), 1.49 – 1.43 (m, 1H, CH), 1.43 – 1.33 (m, 1H, CH<sub>2d</sub>), 1.33 – 1.15 (m, 2H, CH<sub>2e</sub> and CH<sub>2e</sub>), 1.04 (dd,  $J = 13.6, 6.7$  Hz, 1H, CH<sub>2d</sub>), 0.81 (t,  $J = 7.4$  Hz, 3H, CH<sub>2</sub>CH<sub>3</sub>); **<sup>13</sup>C-NMR** (125 MHz, CDCl<sub>3</sub>)  $\delta$  167.3 (C=O), 157.9 (C-OCH<sub>3</sub>), 147.8 (CHAr), 145.0 (CAr), 134.1 (CAr), 132.0 (CHAr), 131.8 (CHAr), 128.6 (CHAr), 127.3 (CHAr), 121.6 (CHAr), 102.1 (CHAr), 60.3 (CH), 57.9 (CH<sub>2</sub>), 55.8 (OCH<sub>3</sub>), 53.6 (CH), 41.1 (CH<sub>2</sub>), 37.4 (CH), 28.7 (CH<sub>2</sub>), 27.5 (CH<sub>2</sub>), 26.1 (CH<sub>2</sub>), 25.2 (CH), 12.1 (CH<sub>3</sub>); **HRMS** (ESI): calcd. for C<sub>27</sub>H<sub>32</sub>N<sub>3</sub>O<sub>2</sub><sup>+</sup> [M+H]<sup>+</sup> 430.2489, found  $m/z$  430.2482.

### 2.1.8 Synthesis and characterization of ligand 1f

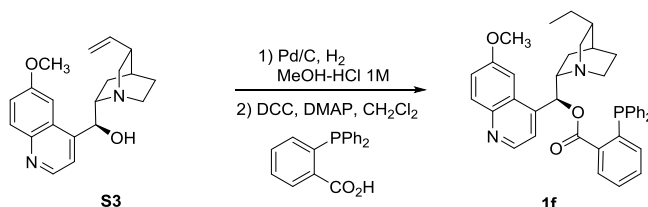

**S3** (425 mg, 1.31 mmol) was dissolved in 5 mL of 2:1 MeOH/HCl 1M and 10% Pd/C (43 mg) was added. The reaction mixture was stirred under hydrogen (1 atm) for 7 h at room temperature and then filtered through Celite washing with water and MeOH. The filtrate was concentrated under reduced pressure and neutralized with sat. NaHCO<sub>3</sub>. The resultant solution



70% yield) which was dissolved in 12 mL of MeOH. NaOMe (111.7 mg, 2.07 mmol) and paraformaldehyde (207.4 mg, 6.9 mmol) were added and the reaction mixture was stirred at room temperature for 4 h. Then the mixture was cooled to 0 °C and NaBH<sub>4</sub> (261 mg, 6.9 mmol) was added in small portions. The mixture was stirred for 30 minutes and the reaction was quenched by addition of water (6 mL), extracted with EtOAc (3 × 50 mL), washed with water, brine and dried over Na<sub>2</sub>SO<sub>4</sub>. The organic phase was concentrated under reduced pressure. Purification by flash column chromatography using EtOAc:MeOH:Et<sub>3</sub>N 100:20:3 afforded the product **S4** as a colorless oil in 30% yield (200 mg).

[ $\alpha$ ]<sub>D</sub><sup>25</sup> = -79 (*c* = 0.26 in CHCl<sub>3</sub>). **IR** (film)  $\nu$  = 2934, 2862, 1620, 1588, 1507, 1472, 1432, 1229, 1033, 856, 831 cm<sup>-1</sup>; **HRMS** (ESI): calcd. for C<sub>21</sub>H<sub>30</sub>N<sub>3</sub>O<sup>+</sup> [M+H]<sup>+</sup> 340.2383, found *m/z* 340.2383 (compound **S4** has not been fully characterized due to the poor resolution of broad signals in NMR).

The amine **S4** (172 mg, 0.51 mmol) was dissolved in 3 mL of CH<sub>2</sub>Cl<sub>2</sub>. 2-(diphenylphosphino)benzoic acid (186 mg, 0.61 mmol) and 4-dimethylaminopyridine (7.5 mg, 0.06 mmol) were added. The mixture was cooled to 0 °C, dicyclohexyl carbodiimide (115 mg, 0.56 mmol) was added and then the ice bath was removed and the resultant solution was stirred at room temperature for 12 h. After filtration, CH<sub>2</sub>Cl<sub>2</sub> was removed under reduced pressure and the residue was dissolved in EtOAc and washed with water, brine and dried over Na<sub>2</sub>SO<sub>4</sub>. The organic phase was concentrated under vacuum. Purification by flash column chromatography using EtOAc:MeOH 9:1 afforded the product **1g** as a colorless oil in 17% yield (55 mg).

[ $\alpha$ ]<sub>D</sub><sup>25</sup> = -22 (*c* = 1.0 in CHCl<sub>3</sub>). **IR** (film)  $\nu$  = 2927, 1621, 1509, 1476, 1435, 1324, 1242, 1047, 908, 729, 696 cm<sup>-1</sup>; **<sup>1</sup>H-NMR** (400 MHz, CDCl<sub>3</sub>)  $\delta$  8.64 (d, *J* = 4.5 Hz, 1H, CHAr), 8.27 (s, 1H, CHAr), 7.98 (d, *J* = 9.1 Hz, 1H, CHAr), 7.34 (dd, *J* = 9.1, 2.7 Hz, 1H, CHAr), 7.29 – 7.11 (m, 7H, CHAr), 7.05 (d, *J* = 4.6 Hz, 1H, CHAr), 6.94 (m, 4H, CHAr), 6.77 (d, *J* = 6.4 Hz, 2H, CHAr), 6.50 (s, 1H, CHAr), 6.45 (d, *J* = 11.4 Hz, 1H, CH), 3.91 (s, 3H, OCH<sub>3</sub>), 3.55 – 3.32 (m, 2H, CH and CH<sub>2a</sub>), 3.22 (dd, *J* = 13.2, 9.1 Hz, 1H, CH<sub>2b</sub>), 2.75 – 2.52 (m, 1H, CH<sub>2a'</sub>), 2.40 (d, *J* = 13.5 Hz, 1H, CH<sub>2b'</sub>), 1.90 (s, 3H, N-CH<sub>3</sub>), 1.73 (dd, *J* = 12.7, 9.9 Hz, 1H, CH<sub>2c</sub>), 1.57 (d, *J* = 21.0 Hz, 2H, CH and CH<sub>2c'</sub>), 1.47 – 1.22 (m, 4H, CH<sub>2d</sub>, CH<sub>2d'</sub>, CH and CH<sub>2e</sub>), 0.84 (t, *J* = 7.1 Hz, 3H, CH<sub>3</sub>), 0.63 (dd, *J* = 13.0, 7.4 Hz, 1H, CH<sub>2e'</sub>); **<sup>13</sup>C-NMR** (125 MHz, CDCl<sub>3</sub>)  $\delta$  170.9 (C=O), 158.6 (C-OCH<sub>3</sub>), 146.5 (CHAr), 145.1 (CAr), 144.0 (d, *J* = 34.9 Hz, CAr), 140.6 (CAr), 136.6 (d, *J* = 12.0 Hz, CAr), 134.6 (CAr), 134.4 (d, *J* = 21.0 Hz, CHAr), 133.2 (d, *J* = 14.8 Hz, CAr), 133.9 (CHAr), 133.2 (d, *J* = 18.7 Hz, CHAr), 131.1 (CHAr), 130.2 (CHAr), 129.2 (CHAr), 128.7 (d, *J* = 5.3 Hz, CHAr), 128.4 (d, *J* = 6.1 Hz, CHAr), 128.2 (CHAr), 128.0 (d, *J* = 7.5 Hz, CHAr), 126.6 (d, *J* = 7.6 Hz, CHAr), 123.1 (CHAr), 120.2 (CHAr), 103.7 (CHAr), 58.8 (CH<sub>2</sub>), 56.2 (OCH<sub>3</sub>), 56.1 (CH), 53.5 (CH), 42.0 (CH<sub>2</sub>), 37.7 (N-CH<sub>3</sub>), 30.8 (CH), 28.6 (CH<sub>2</sub>), 28.1 (CH<sub>2</sub>), 27.7 (CH<sub>2</sub>), 25.4 (CH), 12.3 (CH<sub>3</sub>); **<sup>31</sup>P-NMR** (162 MHz, CDCl<sub>3</sub>)  $\delta$  -14.6 (brs); **HRMS** (ESI): calcd. for C<sub>40</sub>H<sub>42</sub>N<sub>3</sub>NaO<sub>2</sub>P<sup>+</sup> [M+Na]<sup>+</sup> 650.2907, found *m/z* 650.2901.



## 2.2 General procedure for the synthesis of racemic imidazolines **5**

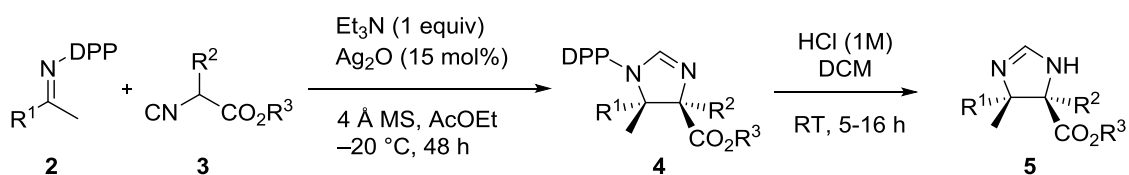

A heterogeneous mixture of isocyanoacetate **3** (0.16 mmol, 1.0 equiv), *N*-diphenylphosphinoyl imine **2** (0.176 mmol, 1.1 equiv), Ag<sub>2</sub>O (5.6 mg, 0.024 mmol, 0.15 equiv), powdered 4 Å molecular sieves (60 mg), Et<sub>3</sub>N (22 μL, 0.16 mmol, 1.0 equivalent) in ethyl acetate (0.09 M) was stirred at -20 °C for 48 hours. The reaction mixture was filtered through a short pad of celite washing with AcOEt. The filtrate was concentrated under reduced pressure and purified through a short pad of silica eluting with PE:EtOAc 1:9 to obtain compound **4**. Due to its instability, compound **4** was used directly in the following step. The *N*-diphenylphosphinoyl imidazoline **4** (1.0 equiv) was dissolved in dichloromethane (10 mL/mmol), then 1.0 M HCl (10 mL/mmol) was added and the mixture was stirred for 5-16 hours (followed by MS). The reaction was quenched with a solution of sodium bicarbonate to pH ca 7, then extracted with dichloromethane (2 × 6 mL), washed with water (5 mL) and brine (5 mL), dried over anhydrous sodium sulphate, filtered and concentrated under reduced pressure. The crude was purified by flash column chromatography using EtOAc:MeOH 9:1 to obtain compound **5**.

## 2.3 General procedure A for the enantioselective synthesis of imidazolines **5**

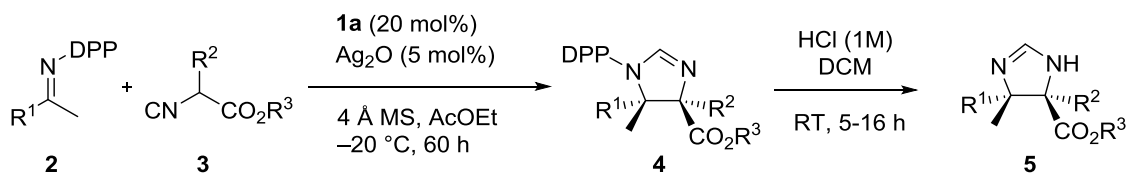

To a mixture of pre-catalyst **1a** (0.20 equiv), Ag<sub>2</sub>O (0.05 equiv), powdered 4 Å molecular sieves (60 mg/0.16 mmol) and *N*-diphenylphosphinoyl imine **2** (1.1 equiv), ethyl acetate (1 mL/0.16 mmol) was added. The reaction mixture was cooled to -20 °C under nitrogen atmosphere and a cold solution of isocyanoacetate **3** (1.0 equiv in 1 mL/0.16 mmol of EtOAc) was added. The heterogeneous mixture was stirred at -20 °C for 60 hours. The reaction mixture was purified through a short path of silica gel using AcOEt to obtain compound **4**. Due to its instability, compound **4** was used directly in the following step. The *N*-diphenylphosphinoyl imidazoline **4** (1.0 equiv) was dissolved in dichloromethane (6 mL/mmol), then 1.0 M HCl (6 mL/mmol) was added and the mixture was stirred for 5-16 hours (followed by MS). The reaction was quenched with a solution of sodium bicarbonate to pH ca 7, then extracted with dichloromethane (2 × 6 mL), washed with water (5 mL) and brine (5 mL), dried over anhydrous sodium sulphate, filtered and concentrated under reduced pressure. The crude was purified by flash column chromatography using EtOAc:MeOH 9:1 to obtain compound **5**.

## 2.4 General procedure B for the enantioselective synthesis of imidazolines 5

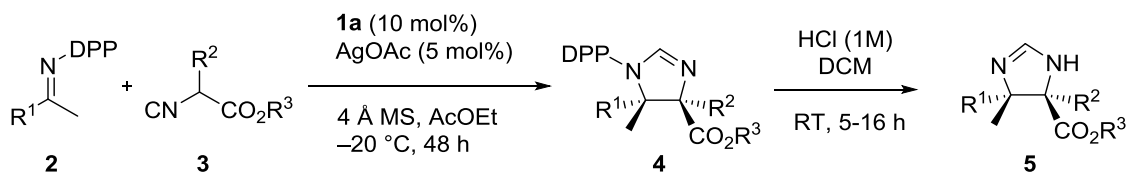

To a mixture of precatalyst **1a** (9.8 mg, 0.016 mmol, 0.10 equiv), AgOAc (1.3 mg, 0.008 mmol, 0.05 equiv), powdered 4 Å molecular sieves (60 mg) and *N*-diphenylphosphinoyl imine **2** (0.176 mmol, 1.1 equiv), ethyl acetate (1 mL) was added. The reaction mixture was cooled to -20 °C under nitrogen atmosphere and a cold solution of isocyanoacetate **3** (0.16 mmol, 1.0 equiv in 1 mL of EtOAc) was added. The heterogeneous mixture was stirred at -20 °C for 48 hours. The reaction mixture was purified through a short path of silica gel using PE:EtOAc 1:9 to obtain compound **4**. Due to its instability, compound **4** was used directly in the following step. The *N*-diphenylphosphinoyl imidazoline **4** (1.0 equiv) was dissolved in dichloromethane (10 mL/mmol), then 1.0 M HCl (10 mL/mmol) was added and the mixture was stirred for 5-16 hours (followed by MS). The reaction was quenched with a solution of sodium bicarbonate to pH ca 7, then extracted with dichloromethane (2 × 6 mL), washed with water (5 mL) and brine (5 mL), dried over anhydrous sodium sulphate, filtered and concentrated under reduced pressure. The crude was purified by flash column chromatography using EtOAc:MeOH 9:1 to obtain compound **5**.

### 2.4.1 Synthesis and characterization of (4*S*,5*R*)-methyl-4,5-dimethyl-4-phenyl-4,5-dihydro-1*H*-imidazole-5-carboxylate **5a**

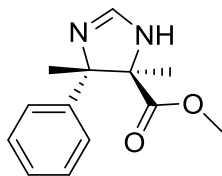

According to general procedure A, using methyl 2-isocyanoopropanoate **2a** (40 mg, 0.35 mmol) and *P,P*-diphenyl-*N*-(1-phenylethylidene)phosphinic amide **3a** (124.2 mg, 0.39 mmol), ligand **1a** (42 mg, 0.07 mmol), Ag<sub>2</sub>O (4.1 mg, 0.017 mmol) as starting materials and ethyl acetate (4 mL) as solvent, imidazoline **4a** was obtained in 63% yield (96 mg, *trans*:*cis* = 98:2). Deprotection of imidazoline *trans*-**4a** (95 mg, 0.219 mmol) using dichloromethane (1.0 mL) as solvent according to general procedure A gave imidazoline **5a** as a white solid in 93% yield (47 mg, 59% yield over two steps). The ee was determined by HPLC using a Chiralpak AD column [hexane/*iso*-propanol 90:10, λ 230 nm, 1 mL/min]: t (minor) = 7.3 min; t (major) = 8.2 min (89% ee).

[α]<sub>D</sub><sup>25</sup> = +236 (*c* = 0.5 in CHCl<sub>3</sub>). **M.p.** 104 – 105 °C; **IR** (film) ν = 3087, 1728, 1604, 1446, 1276, 1134, 763, 734 cm<sup>-1</sup>; **<sup>1</sup>H-NMR** (500 MHz, CDCl<sub>3</sub>) δ 7.59 – 7.54 (m, 2H, CHAr), 7.34 (t, *J* = 7.5 Hz, 2H, CHAr), 7.30 – 7.25 (m, 1H, CHAr), 7.22 (s, 1H, CH=N), 4.17 (s, 1H, NH), 3.83 (s, 3H, OCH<sub>3</sub>), 1.50 (s, 3H, CH<sub>3</sub>-C-Ar), 0.89 (s, 3H, CH<sub>3</sub>-C-CO); **<sup>13</sup>C-NMR** (125 MHz, CDCl<sub>3</sub>) δ 174.1 (C=O), 151.7 (CH=N), 141.8 (CAr), 128.0 CHAr), 127.4 (CHAr), 127.0 (CHAr), 74.9 (C-CO), 73.5 (C-Ar), 52.4 (OCH<sub>3</sub>), 25.9 (CH<sub>3</sub>-C-Ar), 24.4 (CH<sub>3</sub>-C-CO); **HRMS** (ESI): calcd. for C<sub>13</sub>H<sub>17</sub>N<sub>2</sub>O<sub>2</sub><sup>+</sup> [M+H]<sup>+</sup> 233.1285, found *m/z* 233.1284.

#### 2.4.2 Synthesis and characterization of (4*S*,5*R*)-isopropyl-4,5-dimethyl-4-phenyl-4,5-dihydro-1*H*-imidazole-5-carboxylate **5b**

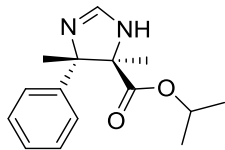

According to general procedure A, using isopropyl 2-isocyanopropanoate **2b** (23 mg, 0.16 mmol) and *P,P*-diphenyl-*N*-(1-phenylethylidene)phosphinic amide **3a** (56.5 mg, 0.18 mmol), ligand **1a** (19.7 mg, 0.032 mmol), Ag<sub>2</sub>O (1.9 mg, 0.008 mmol) as starting materials and ethyl acetate (2 mL) as solvent, imidazoline **4b** was obtained in 87% yield (71 mg, *trans*:*cis* = 98:2). Deprotection of imidazoline *trans*-**4b** (60 mg, 0.13 mmol) using dichloromethane (0.8 mL) as solvent according to general procedure A gave imidazoline **5b** as a colorless oil in 88% yield (30 mg, 77% yield over two steps). The ee was determined by HPLC using a Chiralpak AD column [hexane/*iso*-propanol 80:20, λ 230 nm, 1 mL/min]: t (minor) = 4.1 min; t (major) = 4.6 min (80% ee).

[α]<sub>D</sub><sup>25</sup> = +150 (*c* = 0.5 in CHCl<sub>3</sub>). IR (film) ν = 2979, 1719, 1603, 1447, 1274, 1145, 1101, 700 cm<sup>-1</sup>; <sup>1</sup>H-NMR (500 MHz, CDCl<sub>3</sub>) δ 7.64 – 7.58 (m, 2H, CHAr), 7.34 (t, *J* = 7.5 Hz, 2H, CHAr), 7.30 – 7.24 (m, 1H, CHAr), 7.19 (s, 1H, CH=N), 5.17 (hept, *J* = 6.3 Hz, 1H, CH-(CH<sub>3</sub>)<sub>2</sub>), 1.53 (s, 3H, CH<sub>3</sub>-C-Ar), 1.39 (d, *J* = 6.3 Hz, 3H, CH-(CH<sub>3</sub>)<sub>2</sub>), 1.31 (d, *J* = 6.3 Hz, 3H, CH-(CH<sub>3</sub>)<sub>2</sub>), 0.88 (s, 3H, CH<sub>3</sub>-C-CO); <sup>13</sup>C-NMR (125 MHz, CDCl<sub>3</sub>) δ 173.1 (C=O), 151.3 (CH=N), 142.1 (CAr), 127.9 (CHAr), 127.2 (CHAr), 74.3 (C-Ar), 73.7 (C-CO), 69.3 (CH-(CH<sub>3</sub>)<sub>2</sub>), 25.8 (CH<sub>3</sub>-C-Ar), 24.6 (CH<sub>3</sub>-C-CO), 22.0 (CH-(CH<sub>3</sub>)<sub>2</sub>), 21.9 (CH-(CH<sub>3</sub>)<sub>2</sub>); HRMS (ESI): calcd. for C<sub>15</sub>H<sub>21</sub>N<sub>2</sub>O<sub>2</sub><sup>+</sup> [M+H]<sup>+</sup> 261.1598, found *m/z* 261.1605.

#### 2.4.3 Synthesis and characterization of *tert*-butyl (4*S*,5*R*)-4,5-dimethyl-4-phenyl-4,5-dihydro-1*H*-imidazole-5-carboxylate **5c**

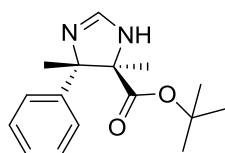

The general procedure B was followed. The desired product was obtained as a colorless oil in 90% yield (40 mg, *trans* diastereoisomer only). The ee was determined by HPLC using a Chiralpak AD column [hexane/*iso*-propanol 95:5, λ 220 nm, 1 mL/min]: t (minor) = 9.4 min, t (major) = 11.6 min (89% ee).

[α]<sub>D</sub><sup>25</sup> = +197 (*c* = 0.5 in CHCl<sub>3</sub>). IR (film) ν = 2976, 2931, 1729, 1606, 1448, 1393, 1292, 701 cm<sup>-1</sup>; <sup>1</sup>H-NMR (500 MHz, CDCl<sub>3</sub>) δ 7.63 – 7.58 (m, 2H, CHAr), 7.33 (t, *J* = 7.5 Hz, 2H, CHAr), 7.29 – 7.24 (m, 1H, CHAr), 7.17 (s, 1H, CH=N), 4.35 (br s, 1H, NH), 1.56 (s, 12H, CH<sub>3</sub>-C-CAr and C(CH<sub>3</sub>)<sub>3</sub>), 0.86 (s, 3H, CH<sub>3</sub>-C-CO); <sup>13</sup>C-NMR (125 MHz, CDCl<sub>3</sub>) δ 172.7 (C=O), 151.1 (CH=N), 142.3 (CAr), 127.8 (CHAr), 127.3 (CHAr), 127.2 (CHAr), 82.3 (C(CH<sub>3</sub>)<sub>3</sub>), 74.6 (C-CAr), 73.6 (C-CO), 28.2 (C(CH<sub>3</sub>)<sub>3</sub>), 25.8 (CH<sub>3</sub>-C-CAr), 24.8 (CH<sub>3</sub>-C-CO); HRMS (ESI): calcd. for C<sub>16</sub>H<sub>23</sub>N<sub>2</sub>O<sub>2</sub><sup>+</sup> [M+H]<sup>+</sup> 275.1754, found *m/z* 275.1757.

#### 2.4.4 Synthesis and characterization of (4*S*,5*R*)-benzyl-4,5-dimethyl-4-phenyl-4,5-dihydro-1*H*-imidazole-5-carboxylate **5d**

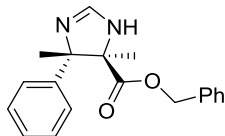

According to general procedure A, using benzyl 2-isocyanopropanoate **2d** (30 mg, 0.16 mmol) and *P,P*-diphenyl-*N*-(1-phenylethylidene)phosphinic amide **3a** (57.5 mg, 0.17 mmol), ligand **1a** (19.4 mg, 0.032 mmol), Ag<sub>2</sub>O

(1.9 mg, 0.008 mmol) as starting materials and ethyl acetate (2 mL) as solvent, imidazoline **4d** was obtained in 85% yield (69 mg, *trans:cis* = 97:3). Deprotection of imidazoline *trans*-**4d** (66 mg, 0.13 mmol) using dichloromethane (0.8 mL) as solvent according to general procedure A gave imidazoline **5d** as a colorless oil in 91% yield (36 mg, 77% yield over two steps). The ee was determined by HPLC using a Chiralpak AD column [hexane/*iso*-propanol 80:20,  $\lambda$  230 nm, 1 mL/min]: t (minor) = 5.4 min; t (major) = 6.3 min (83% ee).

$[\alpha]_D^{25} = +154$  ( $c = 0.5$  in  $\text{CHCl}_3$ ). **IR** (film)  $\nu = 3064, 1729, 1605, 1495, 1270, 1131, 699 \text{ cm}^{-1}$ ;  **$^1\text{H-NMR}$**  (500 MHz,  $\text{CDCl}_3$ )  $\delta$  7.54 – 7.49 (m, 2H, CHAr), 7.46 – 7.33 (m, 5H, CHAr), 7.33 – 7.23 (m, 3H, CHAr), 7.21 (s, 1H, CH=N), 5.31 (d,  $J = 12.2$  Hz, 1H,  $\text{CH}_{2a}$ ), 5.26 (d,  $J = 12.2$  Hz, 1H,  $\text{CH}_{2b}$ ), 1.44 (s, 3H,  $\text{CH}_3\text{-C-Ar}$ ), 0.92 (s, 3H,  $\text{CH}_3\text{-C-CO}$ );  **$^{13}\text{C-NMR}$**  (125 MHz,  $\text{CDCl}_3$ )  $\delta$  173.3 (C=O), 151.5 (CH=N), 141.7 (CAr), 135.5 (CAr), 128.8 (CHAr), 128.8 (CHAr), 128.7 (CHAr), 127.9 (CHAr), 127.3 (CHAr), 127. (CHAr), 74.4 (C-CO), 74.1 (C-Ar), 67.4 ( $\text{CH}_2$ ), 25.8 ( $\text{CH}_3\text{-C-Ar}$ ), 24.4 ( $\text{CH}_3\text{-C-CO}$ ); **HRMS** (ESI): calcd. for  $\text{C}_{19}\text{H}_{21}\text{N}_2\text{O}_2^+$   $[\text{M}+\text{H}]^+$  309.1598, found  $m/z$  309.1598.

#### 2.4.5 Synthesis and characterization of (4*S*,5*R*)-diphenylmethyl-4,5-dimethyl-4-phenyl-4,5-dihydro-1*H*-imidazole-5-carboxylate **5e**

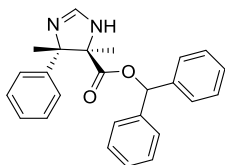

According to general procedure A, using diphenylmethyl 2-isocyanopropanoate **2e** (40 mg, 0.16 mmol) and *P,P*-diphenyl-*N*-(1-phenylethylidene)phosphinic amide **3a** (0.17 mmol, 53.0 mg), precatalyst **1a** (17.6 mg, 0.03 mmol),  $\text{Ag}_2\text{O}$  (1.8 mg, 0.0076 mmol) as starting materials and ethyl acetate (2 mL) as solvent, imidazoline **4e** was obtained in 76% yield (67 mg, *trans:cis*  $\geq$  99:1). Deprotection of imidazoline *trans*-**4e** (65 mg, 0.111 mmol) using dichloromethane (0.7 mL) as solvent according to general procedure A gave imidazoline **5e** as a white solid in 82% yield (35 mg, 62% yield over two steps). The ee was determined by HPLC using a Chiralpak AD column [hexane/*iso*-propanol 80:20,  $\lambda$  240 nm, 1 mL/min]: t (minor) = 6.3 min; t (major) = 11.2 min (84% ee).

$[\alpha]_D^{25} = +111$  ( $c = 0.5$  in  $\text{CHCl}_3$ ). **M.p.** 176 – 177 °C; **IR** (film)  $\nu = 3062, 1734, 1605, 1449, 1264, 1127, 698 \text{ cm}^{-1}$ ;  **$^1\text{H-NMR}$**  (500 MHz,  $\text{CDCl}_3$ )  $\delta$  7.48 – 7.43 (m, 4H, CHAr), 7.40 (t,  $J = 7.4$  Hz, 2H, CHAr), 7.38 – 7.30 (m, 5H, CHAr), 7.31 – 7.24 (m, 4H, CHAr), 7.23 (s, 1H, CH=N), 7.05 (s, 1H, CH-(Ph)<sub>2</sub>), 3.91 (s, 1H, NH), 1.32 (s, 3H,  $\text{CH}_3\text{-C-Ar}$ ), 0.97 (s, 3H,  $\text{CH}_3\text{-C-CO}$ );  **$^{13}\text{C-NMR}$**  (125 MHz,  $\text{CDCl}_3$ )  $\delta$  172.3 (C=O), 151.6 (CH=N), 141.5 (CAr), 139.8 (CAr), 139.6 (CAr), 128.8 (CHAr), 128.7 (CHAr), 128.6 (CHAr), 128.1 (CHAr), 128.1 (CHAr), 127.9 (CHAr), 127.4 (CHAr), 127.3 (CHAr), 126.8 (CHAr), 78.2 (CH-(Ph)<sub>2</sub>), 74.3 (C-CH<sub>3</sub>), 74.2 (C-CH<sub>3</sub>), 25.4 ( $\text{CH}_3\text{-C-Ar}$ ), 24.4 ( $\text{CH}_3\text{-C-CO}$ ); **HRMS** (ESI): calcd. for  $\text{C}_{25}\text{H}_{25}\text{N}_2\text{O}_2^+$   $[\text{M}+\text{H}]^+$  385.1911, found  $m/z$  385.1917.

#### 2.4.6 Synthesis and characterization of *tert*-butyl (4*S*,5*R*)-4,5-dimethyl-4-(*p*-tolyl)-4,5-dihydro-1*H*-imidazole-5-carboxylate **5f**

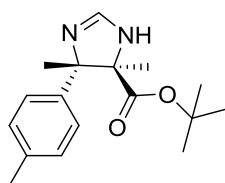

The general procedure B was followed. The desired product was obtained as a colorless oil in 71% yield (33 mg, *trans* diastereoisomer only). The ee was determined by HPLC using a Chiralpak AD column [hexane/*iso*-

propanol 95:5,  $\lambda$  220 nm, 1 mL/min]: t (minor) = 13.7 min, t (major) = 16.4 min (89% ee).

$[\alpha]_D^{25} = +148$  ( $c = 1.0$  in  $\text{CHCl}_3$ ). **IR** (film)  $\nu = 2976, 2929, 1732, 1606, 1513, 1451, 1393, 1368, 1291, 1259, 1133, 848, 807 \text{ cm}^{-1}$ ;  **$^1\text{H-NMR}$**  (500 MHz,  $\text{CDCl}_3$ )  $\delta$  7.48 (d,  $J = 7.1$  Hz, 2H, CHAr), 7.21 (s, 1H, CH=N), 7.13 (d,  $J = 7.1$  Hz, 2H, CHAr), 4.50 (br s, 1H, NH), 2.34 (s, 3H,  $\text{CH}_3\text{-CAr}$ ) 1.55 (s, 9H,  $\text{C}(\text{CH}_3)_3$ ), 1.54 (s, 3H,  $\text{CH}_3\text{-C-CAr}$ ), 0.86 (s, 3H,  $\text{CH}_3\text{-C-CO}$ );  **$^{13}\text{C-NMR}$**  (125 MHz,  $\text{CDCl}_3$ )  $\delta$  172.6 (C=O), 151.2 (CH=N), 139.2 (CAr), 136.8 (CAr), 128.5 (CHAr), 127.2 (CHAr), 82.3 ( $\text{C}(\text{CH}_3)_3$ ), 74.3 (C-CAr), 73.7 (C-CO), 28.2 ( $\text{C}(\text{CH}_3)_3$ ), 25.8 ( $\text{CH}_3\text{-C-CAr}$ ), 24.8 ( $\text{CH}_3\text{-C-CO}$ ), 21.2 ( $\text{CH}_3\text{-CAr}$ ); **HRMS** (ESI): calcd. for  $\text{C}_{17}\text{H}_{25}\text{N}_2\text{O}_2^+$   $[\text{M}+\text{H}]^+$  289.1911, found  $m/z$  289.1913.

#### 2.4.7 Synthesis and characterization of *tert*-butyl (4*S*,5*R*)-4-([1,1'-biphenyl]-4-yl)-4,5-dimethyl-4,5-dihydro-1*H*-imidazole-5-carboxylate **5g**

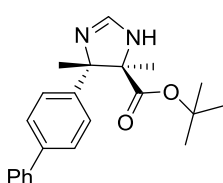

The general procedure B was followed. The desired product was obtained as a pale yellow solid in 87% yield (49 mg, *trans* diastereoisomer only). The ee was determined by HPLC using a Chiralpak AD column [hexane/*iso*-propanol 95:5,  $\lambda$  220 nm, 1 mL/min] t (minor) = 16.7 min, t (major) = 21.8 min (88% ee).

$[\alpha]_D^{25} = +60$  ( $c = 0.53$  in  $\text{CHCl}_3$ ). **M.p.** 70 – 71 °C; **IR** (film)  $\nu = 2976, 2931, 1730, 1605, 1487, 1449, 1369, 1291, 1135, 734 \text{ cm}^{-1}$ ;  **$^1\text{H-NMR}$**  (500 MHz,  $\text{CDCl}_3$ )  $\delta$  7.68 (d,  $J = 8.5$  Hz, 2H, CHAr), 7.62 (dd,  $J = 8.3, 1.2$  Hz, 2H, CHAr), 7.57 (d,  $J = 8.5$  Hz, 2H, CHAr), 7.43 (t,  $J = 7.7$  Hz, 2H, CHAr), 7.36 – 7.29 (m, 1H, CHAr), 7.21 (s, 1H, CH=N), 4.10 (br s, 1H, NH), 1.59 (s, 3H,  $\text{CH}_3\text{-C-CAr}$ ), 1.58 (s, 9H,  $\text{C}(\text{CH}_3)_3$ ), 0.92 (s, 3H,  $\text{CH}_3\text{-C-CO}$ );  **$^{13}\text{C-NMR}$**  (125 MHz,  $\text{CDCl}_3$ )  $\delta$  172.6 (C=O), 151.2 (CH=N), 141.4 (CAr), 140.9 (CAr), 139.9 (CAr), 128.9 (CHAr), 127.8 (CHAr), 127.3 (CHAr), 127.1 (CHAr), 126.4 (CHAr), 82.4 ( $\text{C}(\text{CH}_3)_3$ ), 74.5 (C-CAr), 73.6 (C-CO), 28.2 ( $\text{C}(\text{CH}_3)_3$ ), 25.8 ( $\text{CH}_3\text{-C-CAr}$ ), 24.9 ( $\text{CH}_3\text{-C-CO}$ ); **HRMS** (ESI): calcd. for  $\text{C}_{22}\text{H}_{27}\text{N}_2\text{O}_2^+$   $[\text{M}+\text{H}]^+$  351.2067, found  $m/z$  351.2056.

#### 2.4.8 Synthesis and characterization of *tert*-butyl (4*S*,5*R*)-4-(4-fluorophenyl)-4,5-dimethyl-4,5-dihydro-1*H*-imidazole-5-carboxylate **5h**

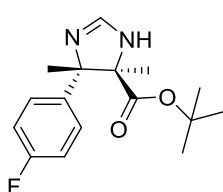

The general procedure B was followed. The desired product was obtained as a pale yellow solid in 89% yield (42 mg, *trans* diastereoisomer only). The ee was determined by HPLC using a Chiralpak AD-H column [hexane/*iso*-propanol 90:10,  $\lambda$  220 nm, 1 mL/min] t (minor) = 5.0 min, t (major) = 5.8 min (90% ee).

$[\alpha]_D^{25} = +175$  ( $c = 0.5$  in  $\text{CHCl}_3$ ). **M.p.** 38 – 39 °C; **IR** (film)  $\nu = 2977, 1730, 1608, 1509, 1369, 1133, 840 \text{ cm}^{-1}$ ;  **$^1\text{H-NMR}$**  (500 MHz,  $\text{CDCl}_3$ )  $\delta$  7.58 (dd,  $J = 8.8, 5.5$  Hz, 2H, CHAr), 7.12 (s, 1H, CH=N), 6.99 (t,  $J = 8.8$  Hz, 2H, CHAr), 4.27 (br s, 1H, NH), 1.54 (s, 9H,  $\text{C}(\text{CH}_3)_3$ ), 1.51 (s, 3H,  $\text{CH}_3\text{-C-CAr}$ ), 0.83 (s, 3H,  $\text{CH}_3\text{-C-CO}$ );  **$^{13}\text{C-NMR}$**  (125 MHz,  $\text{CDCl}_3$ )  $\delta$  172.6 (C=O), 162.0 (d,  $J = 245.4$  Hz, C-F), 151.0 (CH=N), 138.2 (d,  $J = 3.1$  Hz, CAr), 129.0 (d,  $J = 7.8$  Hz, CHAr), 114.4 (d,  $J = 21.0$  Hz, CHAr), 82.4 ( $\text{C}(\text{CH}_3)_3$ ), 74.6 (C-CAr), 73.1 (C-CO), 28.2 ( $\text{C}(\text{CH}_3)_3$ ),

25.8 (CH<sub>3</sub>-C-CAr), 24.9 (CH<sub>3</sub>-C-CO); **HRMS** (ESI): calcd. for C<sub>16</sub>H<sub>22</sub>FN<sub>2</sub>O<sub>2</sub><sup>+</sup> [M+H]<sup>+</sup> 293.1660, found *m/z* 293.1667.

#### 2.4.9 Synthesis and characterization of *tert*-butyl (4*S*,5*R*)-4-(4-chlorophenyl)-4,5-dimethyl-4,5-dihydro-1*H*-imidazole-5-carboxylate **5i**

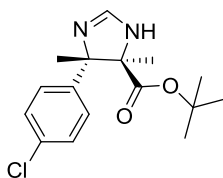

The general procedure B was followed. The desired product was obtained as a white solid in 80% yield (39 mg, *trans* diastereoisomer only). The ee was determined by HPLC using a Chiralpak AD column [hexane/*iso*-propanol 95:5, λ 220 nm, 1 mL/min]: *t* (minor) = 20.0 min, *t* (major) = 23.3 min (89% ee).

[α]<sub>D</sub><sup>25</sup> = +105 (*c* = 0.61 in CHCl<sub>3</sub>). **M.p.** 41 – 42 °C; **IR** (film) ν = 2977, 1730, 1606, 1492, 1452, 1394, 1291, 1132, 1094, 836 cm<sup>-1</sup>; **<sup>1</sup>H-NMR** (500 MHz, CDCl<sub>3</sub>) δ 7.56 (d, *J* = 8.8 Hz, 2H, CHAr), 7.28 (d, *J* = 8.8 Hz, 2H, CHAr), 7.13 (s, 1H, CH=N), 4.20 (br s, 1H, NH), 1.54 (s, 9H, C(CH<sub>3</sub>)<sub>3</sub>), 1.51 (s, 3H, CH<sub>3</sub>-C-CAr), 0.84 (s, 3H, CH<sub>3</sub>-C-CO); **<sup>13</sup>C-NMR** (125 MHz, CDCl<sub>3</sub>) δ 172.5 (C=O), 151.1 (CH=N), 141.0 (CAr), 133.0 (CAr), 128.9 (CHAr), 127.9 (CHAr), 82.5 (C(CH<sub>3</sub>)<sub>3</sub>), 74.7 (C-CAr), 73.0 (C-CO), 28.2 (C(CH<sub>3</sub>)<sub>3</sub>), 25.7 (CH<sub>3</sub>-C-CAr), 24.9 (CH<sub>3</sub>-C-CO); **HRMS** (ESI): calcd. for C<sub>16</sub>H<sub>22</sub>ClN<sub>2</sub>O<sub>2</sub><sup>+</sup> [M+H]<sup>+</sup> 309.1364, found *m/z* 309.1366.

#### 2.4.10 Synthesis and characterization of *tert*-butyl (4*S*,5*R*)-4-(4-methoxyphenyl)-4,5-dimethyl-4,5-dihydro-1*H*-imidazole-5-carboxylate **5j**

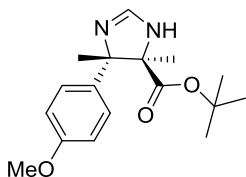

The general procedure B was followed. The desired product was obtained as a colorless oil in 80% yield (39 mg, *trans* diastereoisomer only). The ee was determined by HPLC using a Chiralpak AD column [hexane/*iso*-propanol 85:15, λ 280 nm, 1 mL/min] *t* (minor) = 5.2 min, *t* (major) = 6.0 min (90% ee).

[α]<sub>D</sub><sup>25</sup> = +120 (*c* = 0.8 in CHCl<sub>3</sub>). **IR** (film) ν = 2976, 1729, 1612, 1512, 1455, 1298, 1248, 1180, 1134 cm<sup>-1</sup>; **<sup>1</sup>H-NMR** (500 MHz, CDCl<sub>3</sub>) δ 7.51 (d, *J* = 8.9 Hz, 2H, CHAr), 7.13 (s, 1H, CH=N), 6.85 (d, *J* = 8.9 Hz, 2H, CHAr), 4.12 (br s, 1H, NH), 3.80 (s, 3H, OCH<sub>3</sub>), 1.54 (s, 9H, C(CH<sub>3</sub>)<sub>3</sub>), 1.52 (s, 3H, CH<sub>3</sub>-C-CAr), 0.84 (s, 3H, CH<sub>3</sub>-C-CO); **<sup>13</sup>C-NMR** (125 MHz, CDCl<sub>3</sub>) δ 172.8 (C=O), 158.7 (C-OCH<sub>3</sub>), 151.0 (CH=N), 134.5 (CAr), 128.4 (CHAr), 113.0 (CHAr), 82.2 (C(CH<sub>3</sub>)<sub>3</sub>), 74.2 (C-CAr), 73.6 (C-CO), 55.3 (OCH<sub>3</sub>), 28.2 (C(CH<sub>3</sub>)<sub>3</sub>), 25.8 (CH<sub>3</sub>-C-CAr), 24.8 (CH<sub>3</sub>-C-CO); **HRMS** (ESI): calcd. for C<sub>17</sub>H<sub>25</sub>N<sub>2</sub>O<sub>3</sub><sup>+</sup> [M+H]<sup>+</sup> 305.1860, found *m/z* 305.1858.

#### 2.4.11 Synthesis and characterization of *tert*-butyl (4*S*,5*R*)-4-(3-chlorophenyl)-4,5-dimethyl-4,5-dihydro-1*H*-imidazole-5-carboxylate **5k**

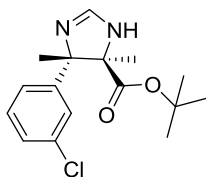

The general procedure B was followed. The desired product was obtained as a colorless oil in 65% yield (32 mg, *trans* diastereoisomer only). The ee was determined by HPLC using a Chiralpak OD-H column [hexane/*iso*-propanol 95:5, λ 220 nm, 1 mL/min] *t* (minor) = 13.7 min, *t* (major) = 29.4 min (87% ee).

$[\alpha]_D^{25} = +113$  ( $c = 1.50$  in  $\text{CHCl}_3$ ). **IR** (film)  $\nu = 2977, 1729, 1596, 1360, 1131, 785, 729, 698$   $\text{cm}^{-1}$ ;  **$^1\text{H-NMR}$**  (400 MHz,  $\text{CDCl}_3$ )  $\delta$  7.58 (m, 1H, CHAr), 7.47 (m, 1H, CHAr), 7.19 (m, 2H, CHAr), 7.06 (s, 1H, CH=N), 1.50 (s, 9H,  $\text{C}(\text{CH}_3)_3$ ), 1.46 (s, 3H,  $\text{CH}_3\text{-C-Car}$ ), 0.81 (s, 3H,  $\text{CH}_3\text{-C-CO}$ );  **$^{13}\text{C-NMR}$**  (125 MHz,  $\text{CDCl}_3$ )  $\delta$  172.4 (C=O), 151.0 (CH=N), 144.7 (CAr), 133.9 (CAr), 129.0 (CHAr), 127.7 (CHAr), 127.3 (CHAr), 125.7 (CHAr), 82.6 ( $\text{C}(\text{CH}_3)_3$ ), 74.8 (C-CAr), 73.0 (C-CO), 28.2 ( $\text{C}(\text{CH}_3)_3$ ), 25.7 ( $\text{CH}_3\text{-C-Car}$ ), 24.9 ( $\text{CH}_3\text{-C-CO}$ ); **HRMS** (ESI): calcd. for  $\text{C}_{16}\text{H}_{22}\text{N}_2\text{O}_2\text{Cl}^+$   $[\text{M}+\text{H}]^+$  309.1364, found  $m/z$  309.1362.

#### 2.4.12 Synthesis and characterization of *tert*-butyl (4*S*,5*R*)-4-(2-fluorophenyl)-4,5-dimethyl-4,5-dihydro-1*H*-imidazole-5-carboxylate 5l

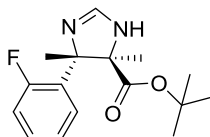

The general procedure B was followed. The desired product was obtained as a yellow oil in 63% yield (29 mg, *trans* diastereoisomer only). The ee was determined by HPLC using a Chiralpak OD-H column [hexane/*iso*-propanol 95:5,  $\lambda$  210 nm, 1 mL/min]  $t$  (minor) = 36.5 min,  $t$  (major) = 50.8 min (90% ee).

$[\alpha]_D^{25} = +71$  ( $c = 0.5$  in  $\text{CHCl}_3$ ). **M.p.** 64 – 65 °C; **IR** (film)  $\nu = 2978, 1724, 1610, 1486, 1446, 1368, 1280, 1209, 786$   $\text{cm}^{-1}$ ;  **$^1\text{H-NMR}$**  (500 MHz,  $\text{CDCl}_3$ )  $\delta$  7.55 (td,  $J = 8.0, 1.8$  Hz, 1H, CHAr), 7.29 – 7.22 (m, 1H, CHAr), 7.16 (s, 1H, CH=N), 7.09 (td,  $J = 7.7, 1.2$  Hz, 1H, CHAr), 7.03 (ddd,  $J = 12.1, 8.0, 1.2$  Hz, 1H, CHAr), 1.69 (d,  $J = 1.9$  Hz, 3H,  $\text{CH}_3\text{-C-Ar}$ ), 1.52 (s, 9H,  $\text{C}(\text{CH}_3)_3$ ), 1.00 (s, 3H,  $\text{CH}_3\text{-C-CO}$ );  **$^{13}\text{C-NMR}$**  (125 MHz,  $\text{CDCl}_3$ )  $\delta$  172.6 (C=O), 160.8 (d,  $J = 248.2$  Hz, C-F), 151.1 (CH=N), 130.1 (d,  $J = 4.4$  Hz, CHAr), 129.5 (d,  $J = 12.3$  Hz, CAr), 129.3 (d,  $J = 8.5$  Hz, CHAr), 123.7 (d,  $J = 3.3$  Hz, CHAr), 116.2 (d,  $J = 24.1$  Hz, CHAr), 82.3 ( $\text{C}(\text{CH}_3)_3$ ), 75.4 (C-Ar), 72.4 (C-CO), 28.0 ( $\text{C}(\text{CH}_3)_3$ ), 25.4 (d,  $J = 7.2$  Hz,  $\text{CH}_3\text{-C-Ar}$ ), 24.0 ( $\text{CH}_3\text{-C-CO}$ ); **HRMS** (ESI): calcd. for  $\text{C}_{16}\text{H}_{22}\text{FN}_2\text{O}_2^+$   $[\text{M}+\text{H}]^+$  293.1660, found  $m/z$  293.1669.

#### 2.4.13 Synthesis and characterization of *tert*-butyl (4*S*,5*R*)-4-(pyridin-3-yl)-4,5-dimethyl-4,5-dihydro-1*H*-imidazole-5-carboxylate 5m

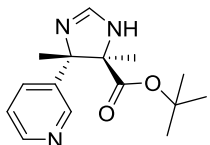

The general procedure B was followed. The desired product was obtained as a pale yellow solid in 80% yield (35 mg, *trans* diastereoisomer only). The ee was determined by HPLC using a Chiralpak AD column [hexane/*iso*-propanol 90:10,  $\lambda$  220 nm, 1 mL/min]  $t$  (minor) = 8.9 min,  $t$  (major) = 11.1 min (87% ee).

$[\alpha]_D^{25} = +127$  ( $c = 0.6$  in  $\text{CHCl}_3$ ). **IR** (film)  $\nu = 2977, 1729, 1607, 1369, 1289, 1129, 715$   $\text{cm}^{-1}$ ;  **$^1\text{H-NMR}$**  (500 MHz,  $\text{CDCl}_3$ )  $\delta$  8.85 (d,  $J = 1.6$  Hz, 1H, CHAr), 8.50 (dd,  $J = 4.7, 1.6$  Hz, 1H, CHAr), 7.94 (dt,  $J = 7.8, 2.0$  Hz, 1H, CHAr), 7.27 (s, 1H, CH=N), 7.24 (m, 1H, CHAr), 5.11 (br s, 1H, NH), 1.55 (s, 3H,  $\text{CH}_3\text{-C-Car}$ ), 1.54 (s, 9H,  $\text{C}(\text{CH}_3)_3$ ), 0.86 (s, 3H,  $\text{CH}_3\text{-C-CO}$ );  **$^{13}\text{C-NMR}$**  (125 MHz,  $\text{CDCl}_3$ )  $\delta$  172.0 (C=O), 151.6 (CH=N), 148.9 (CHAr), 148.5 (CHAr), 137.7 (CAr), 135.0 (CHAr), 122.8 (CHAr), 82.9 ( $\text{C}(\text{CH}_3)_3$ ), 73.6 (C-CAr), 73.0 (C-CO), 28.1 ( $\text{C}(\text{CH}_3)_3$ ), 25.3 ( $\text{CH}_3\text{-C-Car}$ ), 25.0 ( $\text{CH}_3\text{-C-CO}$ ); **HRMS** (ESI): calcd. for  $\text{C}_{15}\text{H}_{22}\text{N}_3\text{O}_2^+$   $[\text{M}+\text{H}]^+$  276.1707, found  $m/z$  276.1711.

#### 2.4.14 Synthesis and characterization of *tert*-butyl (4*R*,5*R*)-4-(furan-2-yl)-4,5-dimethyl-4,5-dihydro-1*H*-imidazole-5-carboxylate **5n**

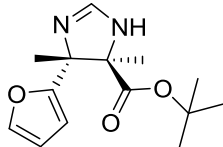

The general procedure B was followed. The desired product was obtained as a pale yellow solid in 83% yield (35 mg, *trans* diastereoisomer only). The ee was determined by HPLC using a Chiralpak AD column [hexane/*iso*-propanol 95:5,  $\lambda$  220 nm, 1 mL/min] t (minor) = 12.9 min, t (major) = 18.5 min (91% ee).

$[\alpha]_D^{25} = +47$  ( $c = 0.5$  in  $\text{CHCl}_3$ ). **IR** (film)  $\nu = 2978, 1725, 1604, 1451, 1368, 1288, 1135, 733$   $\text{cm}^{-1}$ ;  **$^1\text{H-NMR}$**  (500 MHz,  $\text{CDCl}_3$ )  $\delta$  7.38 (s, 1H, CHAr), 7.18 (s, 1H, CH=N), 6.35 – 6.30 (m, 1H, CHAr), 6.29 (d,  $J = 3.2$  Hz, 1H, CHAr), 4.36 (s, 1H, NH), 1.55 (s, 3H,  $\text{CH}_3\text{-C-CAr}$ ), 1.51 (s, 9H,  $\text{C}(\text{CH}_3)_3$ ), 1.05 (s, 3H,  $\text{CH}_3\text{-C-CO}$ );  **$^{13}\text{C-NMR}$**  (125 MHz,  $\text{CDCl}_3$ )  $\delta$  172.1 (C=O), 155.8 (CAr), 152.6 (CH=N), 141.9 (CHAr), 110.3 (CHAr), 107.5 (CHAr), 82.3 ( $\text{C}(\text{CH}_3)_3$ ), 73.6 (C- $\text{CH}_3$ ), 72.0 (C- $\text{CH}_3$ ), 28.1 ( $\text{C}(\text{CH}_3)_3$ ), 23.2 ( $\text{CH}_3\text{-C-CAr}$ ), 22.8 ( $\text{CH}_3\text{-C-CO}$ ); **HRMS** (ESI): calcd. for  $\text{C}_{14}\text{H}_{21}\text{N}_2\text{O}_3^+$  [M+H] $^+$  265.1547, found  $m/z$  265.1554.

#### 2.4.15 Synthesis and characterization of *tert*-butyl (4*S*,5*R*)-4,5-dimethyl-4-phenethyl-4,5-dihydro-1*H*-imidazole-5-carboxylate **5o**

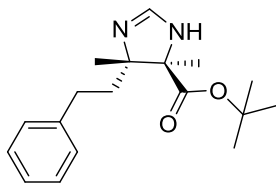

The general procedure B was followed. The asymmetric reaction affords **4o** as a 5:1 mixture of *trans* and *cis* diastereomers. (determined by  $^1\text{H-NMR}$  analysis of the crude reaction mixture). The desired product **5o** was obtained as a clear oil in 48% yield (23 mg, *trans* diastereoisomer only). The ee was determined by HPLC using a Chiralpak OD-H column [hexane/*iso*-propanol 90:10,  $\lambda$  220 nm, 0.5 mL/min] t (minor) = 22.0 min, t (major) = 28.5 min (87% ee).

$[\alpha]_D^{25} = +21$  ( $c = 0.65$  in  $\text{CHCl}_3$ ). **IR** (film)  $\nu = 2973, 1731, 1601, 1454, 1368, 1138, 701$   $\text{cm}^{-1}$ ;  **$^1\text{H-NMR}$**  (500 MHz,  $\text{CDCl}_3$ )  $\delta$  7.32 (m, 2H, CHAr), 7.27 (m, 2H, CHAr), 7.22 (t,  $J = 7.3$  Hz, 1H, CHAr), 7.05 (s, 1H, CH=N), 3.99 (br s, 1H, NH), 2.85 (app dd,  $J = 7.0, 10.1$  Hz, 2H,  $\text{CH}_2\text{Ph}$ ), 2.00 (m, 2H,  $\text{CH}_2\text{CH}_2\text{Ph}$ ), 1.52 (s, 9H,  $\text{C}(\text{CH}_3)_3$ ), 1.34 (s, 3H,  $\text{CO-C-CH}_3$ ), 1.25 (s, 3H,  $\text{CH}_2\text{-C-CH}_3$ );  **$^{13}\text{C-NMR}$**  (125 MHz,  $\text{CDCl}_3$ )  $\delta$  172.6 (C=O), 151.3 (CH=N), 142.9 (CAr), 128.6 (CHAr, CHAr), 125.9 (CHAr), 82.0 ( $\text{C}(\text{CH}_3)_3$ ), 73.2 (C-CO), 70.5 (C- $\text{CH}_2$ ), 38.0 ( $\text{CH}_2\text{-CH}_2\text{Ph}$ ), 31.4 ( $\text{CH}_2\text{Ph}$ ), 28.1 ( $\text{C}(\text{CH}_3)_3$ ), 21.7 ( $\text{CH}_2\text{-C-CH}_3$ ), 21.5 ( $\text{CO-C-CH}_3$ ); **HRMS** (ESI): calcd. for  $\text{C}_{18}\text{H}_{27}\text{N}_2\text{O}_2^+$  [M+H] $^+$  303.20670, found  $m/z$  303.20584.

#### 2.4.16 Synthesis and characterization of *tert*-butyl (4*S*,5*R*)-5-ethyl-4-methyl-4-phenyl-4,5-dihydro-1*H*-imidazole-5-carboxylate **5p**

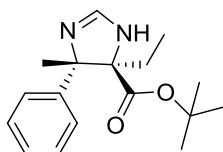

The general procedure B was followed. The desired product was obtained as a pale yellow solid in 62% yield (29 mg, *trans* diastereoisomer only). The ee was determined by HPLC using a Chiralpak AD column [hexane/*iso*-propanol 95:5,  $\lambda$  220 nm, 1 mL/min] t (minor) = 8.5 min, t (major) = 10.1 min (90% ee).



$[\alpha]_D^{25} = +155$  ( $c = 0.5$  in  $\text{CHCl}_3$ ). **M.p.** 170 – 171 °C; **IR** (film)  $\nu = 3088, 2976, 2933, 1732, 1604, 1369, 1250, 1137, 763, 701 \text{ cm}^{-1}$ ;  **$^1\text{H-NMR}$**  (500 MHz,  $\text{CDCl}_3$ )  $\delta$  7.59 (d,  $J = 7.2$  Hz, 2H, CHAr), 7.32 (t,  $J = 7.5$  Hz, 2H, CHAr), 7.28 – 7.22 (m, 1H, CHAr), 7.13 (s, 1H, CH=N), 4.65 (br s, 1H, NH), 1.57 (s, 9H,  $\text{C}(\text{CH}_3)_3$ ), 1.54 (s, 3H,  $\text{CH}_3$ ), 1.18 (dq,  $J = 14.6, 7.4$  Hz, 1H,  $\text{CH}_{2a}\text{-CH}_3$ ), 0.94 (dt,  $J = 14.6, 7.4$  Hz, 1H,  $\text{CH}_{2a}\text{-CH}_3$ ), 0.68 (t,  $J = 7.4$  Hz, 3H,  $\text{CH}_2\text{-CH}_3$ );  **$^{13}\text{C-NMR}$**  (125 MHz,  $\text{CDCl}_3$ )  $\delta$  172.1 (C=O), 151.0 (CH=N), 142.5 (CAr), 127.6 (CHAr), 127.6 (CHAr), 127.0 (CHAr), 82.4 ( $\text{C}(\text{CH}_3)_3$ ), 76.5 (C-CO), 76.0 (C-CAr), 30.7 ( $\text{CH}_2\text{-CH}_3$ ), 28.2 ( $\text{C}(\text{CH}_3)_3$ ), 26.2 ( $\text{CH}_3$ ), 8.7 ( $\text{CH}_2\text{-CH}_3$ ); **HRMS** (ESI): calcd. for  $\text{C}_{17}\text{H}_{25}\text{N}_2\text{O}_2^+$   $[\text{M}+\text{H}]^+$  289.1911, found  $m/z$  289.1913.

#### 2.4.17 Synthesis and characterization of *tert*-butyl (4*S*,5*R*)-4-(4-chlorophenyl)-5-ethyl-4-methyl-4,5-dihydro-1*H*-imidazole-5-carboxylate 5q

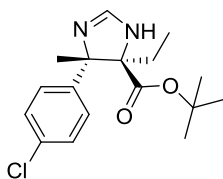

The general procedure B was followed. The desired product was obtained as a white solid in 81% yield (42 mg, *trans* diastereoisomer only). The ee was determined by HPLC using a Chiralpak AD column [hexane/*iso*-propanol 95:5,  $\lambda$  220 nm, 1 mL/min]  $t$  (minor) = 7.7 min,  $t$  (major) = 8.2 min (89% ee).

$[\alpha]_D^{25} = +99$  ( $c = 5.2$  in  $\text{CHCl}_3$ ). **M.p.** 130 – 135 °C;  **$^1\text{H-NMR}$**  (400 MHz,  $\text{CDCl}_3$ )  $\delta$  7.48 (d,  $J = 8.0$  Hz, 2H, CHAr), 7.21 (d,  $J = 8.0$  Hz, 2H, CHAr), 7.04 (s, 1H, CH=N), 1.50 (s, 9H,  $\text{C}(\text{CH}_3)_3$ ), 1.43 (s, 3H,  $\text{CH}_3$ ), 1.12 – 1.07 (m, 1H,  $\text{CH}_{2a}\text{-CH}_3$ ), 0.88 – 0.82 (m, 1H,  $\text{CH}_{2a}\text{-CH}_3$ ), 0.61 (t,  $J = 7.4$  Hz, 3H,  $\text{CH}_2\text{-CH}_3$ );  **$^{13}\text{C-NMR}$**  (125 MHz,  $\text{CDCl}_3$ )  $\delta$  171.8 (C=O), 150.9 (CH=N), 141.1 (CAr), 132.7 (CAr), 129.0 (CHAr), 127.6 (CHAr), 82.5 ( $\text{C}(\text{CH}_3)_3$ ), 75.8 (C-CAr or C-CO, one quaternary C obscured by solvent resonance), 30.6 ( $\text{CH}_{2a}\text{-CH}_3$ ), 28.1 ( $\text{C}(\text{CH}_3)_3$ ), 26.0 ( $\text{CH}_3$ ), 8.5 ( $\text{CH}_2\text{-CH}_3$ ); **HRMS** (ESI): calcd. for  $\text{C}_{17}\text{H}_{24}\text{N}_2\text{O}_2\text{Cl}^+$   $[\text{M}+\text{H}]^+$  323.1521, found  $m/z$  323.1520.

#### 2.4.18 Synthesis and characterization of *tert*-butyl (4*S*,5*R*)-5-ethyl-4-(4-methoxyphenyl)-4-methyl-4,5-dihydro-1*H*-imidazole-5-carboxylate 5r

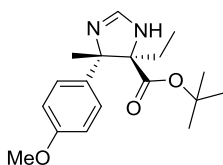

The general procedure B was followed. The desired product was obtained as an off-white solid in 79% yield (40 mg, *trans* diastereoisomer only). The ee was determined by HPLC using a Chiralpak AD column [hexane/*iso*-propanol 95:5,  $\lambda$  220 nm, 1 mL/min]  $t$  (minor) = 9.4 min,  $t$  (major) = 11.2 min (92% ee).

$[\alpha]_D^{25} = +109$  ( $c = 11.3$  in  $\text{CHCl}_3$ ). **M.p.** 125 – 128 °C; **IR** (film)  $\nu = 2978, 1731, 1512, 1247, 1137$ ;  **$^1\text{H-NMR}$**  (400 MHz,  $\text{CDCl}_3$ )  $\delta$  7.44 (d,  $J = 12.0$  Hz, 2H, CHAr), 7.05 (s, 1H, CH=N), 6.79 (d,  $J = 12.0$  Hz, 2H, CHAr), 3.47 (s, 1H,  $\text{OCH}_3$ ), 1.50 (s, 9H,  $\text{C}(\text{CH}_3)_3$ ), 1.44 (s, 3H,  $\text{CH}_3$ ), 1.14 – 1.09 (m, 1H,  $\text{CH}_{2a}\text{-CH}_3$ ), 0.90 – 0.86 (m, 1H,  $\text{CH}_{2a}\text{-CH}_3$ ), 0.61 (t,  $J = 8.0$  Hz, 3H,  $\text{CH}_2\text{-CH}_3$ );  **$^{13}\text{C-NMR}$**  (125 MHz,  $\text{CD}_2\text{Cl}_2$ )  $\delta$  171.8 (C=O), 158.5 (CAr), 150.7 (CH=N), 134.7 (CAr), 128.6 (CHAr), 112.6 (CHAr), 82.0 ( $\text{C}(\text{CH}_3)_3$ ), 76.5 (C-CO), 75.3 (C-CAr), 55.1 ( $\text{OCH}_3$ ), 30.5 ( $\text{CH}_2\text{-CH}_3$ ), 27.8 ( $\text{C}(\text{CH}_3)_3$ ), 25.9 ( $\text{CH}_3$ ), 8.3 ( $\text{CH}_2\text{-CH}_3$ ); **HRMS** (ESI): calcd. for  $\text{C}_{18}\text{H}_{27}\text{N}_2\text{O}_3^+$   $[\text{M}+\text{H}]^+$  319.2016, found  $m/z$  319.2015.

#### 2.4.19 Synthesis and characterization of *tert*-butyl (4*R*,5*R*)-5-ethyl-4-(furan-2-yl)-4-methyl-4,5-dihydro-1*H*-imidazole-5-carboxylate 5s

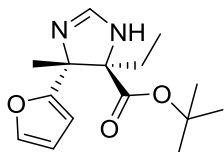

The general procedure B was followed. The desired product was obtained as a colorless oil in 84% yield (37 mg, *trans* diastereoisomer only). The ee was determined by HPLC using a Chiralpak AD column [hexane/*iso*-propanol 90:10,  $\lambda$  220 nm, 1 mL/min]: t (minor) = 8.2 min, t (major) = 10.3 min (93% ee).

$[\alpha]_D^{25} = +21.1$  ( $c = 15.1$  in  $\text{CHCl}_3$ ). **IR** (film)  $\nu = 2980, 1737, 1247, 1141$ ;  **$^1\text{H-NMR}$**  (400 MHz,  $\text{CDCl}_3$ )  $\delta$  7.32 (dd,  $J = 1.7, 0.8$  Hz, 1H, CHAr), 7.08 (s, 1H, CH=N), 6.27 (dd,  $J = 3.2, 1.7$  Hz, 1H, CHAr), 6.21 (dd,  $J = 3.2, 0.8$  Hz, 1H, CHAr), 1.48 (s, 3H, C-CH<sub>3</sub>), 1.46 (s, 9H, C(CH<sub>3</sub>)<sub>3</sub>), 1.40 – 1.30 (m, 1H, CH<sub>2a</sub>-CH<sub>3</sub>), 1.19 – 1.11 (m, 1H, CH<sub>2a</sub>-CH<sub>3</sub>), 0.68 (t,  $J = 8.0$  Hz, 3H, CH<sub>2</sub>-CH<sub>3</sub>);  **$^{13}\text{C-NMR}$**  (125 MHz,  $\text{CD}_2\text{Cl}_2$ )  $\delta$  171.1 (C=O), 156.0 (CAr), 152.9 (CH=N), 141.8 (CHAr), 110.2 (CHAr), 107.6 (CHAr), 82.3 (C(CH<sub>3</sub>)<sub>3</sub>), 77.1 (C-CO), 72.8 (C-CAr), 28.7 (CH<sub>2</sub>-CH<sub>3</sub>), 27.8 (C(CH<sub>3</sub>)<sub>3</sub>), 23.5 (CH<sub>3</sub>), 8.7 (CH<sub>2</sub>-CH<sub>3</sub>); **HRMS** (ESI): calcd. for  $\text{C}_{15}\text{H}_{23}\text{N}_2\text{O}_3^+$   $[\text{M}+\text{H}]^+$  279.1703, found  $m/z$  279.1702.

#### 2.4.20 Synthesis and characterization of *tert*-butyl (4*S*,5*R*)-5-butyl-4-methyl-4-phenyl-4,5-dihydro-1*H*-imidazole-5-carboxylate 5t

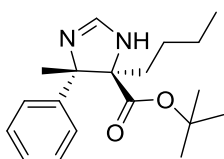

The general procedure B was followed. The desired product was obtained as a colorless oil in in 85% yield (43 mg, *trans* diastereoisomer only). The ee was determined by HPLC using a Chiralpak AD column [hexane/*iso*-propanol 95:5,  $\lambda$  220 nm, 1 mL/min]: t (minor) = 12.5 min, t (major) = 18.4 min (91% ee).

$[\alpha]_D^{25} = +131$  ( $c = 14.3$  in  $\text{CHCl}_3$ ). **IR** (film)  $\nu = 2970, 1730, 1579, 1356$   $\text{cm}^{-1}$ ;  **$^1\text{H-NMR}$**  (400 MHz,  $\text{CDCl}_3$ )  $\delta$  7.53 – 7.51 (m, 2H, CHAr), 7.27 – 7.17 (m, 3H, CHAr), 7.07 (s, 1H, CH=N), 1.50 (s, 9H, C(CH<sub>3</sub>)<sub>3</sub>), 1.46 (s, 3H, CH<sub>3</sub>), 1.08 – 0.97 (m, 4H, CH<sub>2</sub>), 0.88 – 0.83 (m, 2H, CH<sub>2</sub>), 0.65 (t,  $J = 8.0$  Hz, 3H, CH<sub>2</sub>-CH<sub>3</sub>);  **$^{13}\text{C-NMR}$**  (125 MHz,  $\text{CDCl}_3$ )  $\delta$  172.2 (C=O), 150.9 (CH=N), 142.3 (CAr), 127.6 (CHAr), 127.5 (CHAr), 126.9 (CHAr), 82.3 (C(CH<sub>3</sub>)<sub>3</sub>), 76.0 (C-CAr or C-CO, one quaternary C obscured by solvent resonance), 37.1 (CH<sub>2</sub>), 28.1 (C(CH<sub>3</sub>)<sub>3</sub>), 26.6 (CH<sub>2</sub>), 26.2 (CH<sub>3</sub>), 22.8 (C-CH<sub>3</sub>), 13.9 (CH<sub>2</sub>-CH<sub>3</sub>); **HRMS** (ESI): calcd. for  $\text{C}_{19}\text{H}_{29}\text{N}_2\text{O}_3^+$   $[\text{M}+\text{H}]^+$  317.2224, found  $m/z$  317.2225.

#### 2.4.21 Synthesis and characterization of *tert*-butyl (4*S*,5*R*)-5-butyl-4-(4-fluorophenyl)-4-methyl-4,5-dihydro-1*H*-imidazole-5-carboxylate 5u

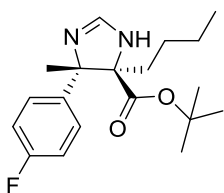

The general procedure B was followed. The desired product was obtained as an off-white solid in in 83% yield (44 mg, *trans* diastereoisomer only). The ee was determined by HPLC using a Chiralpak AD column [hexane/*iso*-propanol 90:10,  $\lambda$  220 nm, 1 mL/min] t (minor) = 4.6 min, t (major) = 5.9 min (90% ee).

$[\alpha]_D^{25} = +140$  ( $c = 15.1$  in  $\text{CHCl}_3$ ). **M.p.** 117 – 119 °C; **IR** (film)  $\nu = 2960, 1731, 1509, 1136$   $\text{cm}^{-1}$ ;  **$^1\text{H-NMR}$**  (400 MHz,  $\text{CDCl}_3$ )  $\delta$  7.56 (d, 2H,  $J = 9.0, 5.5$  Hz,  $\text{CHAr}$ ), 7.12 (s, 1H,  $\text{CH=N}$ ), 6.99 (t, 2H,  $J = 8.8$  Hz,  $\text{CHAr}$ ), 1.55 (s, 9H,  $\text{C}(\text{CH}_3)_3$ ), 1.49 (s, 3H,  $\text{CH}_3$ ), 1.15 – 1.01 (m, 4H,  $\text{CH}_2$ ), 0.97 – 0.83 (m, 2H,  $\text{CH}_2$ ), 0.66 (t,  $J = 7.0$  Hz,  $\text{CH}_2\text{-CH}_3$ );  **$^{13}\text{C-NMR}$**  (125 MHz,  $\text{CDCl}_3$ )  $\delta$  172.2 ( $\text{C=O}$ ), 162.0 (d,  $J_{\text{C,F}} = 303.7$  Hz,  $\text{CFAr}$ ), 151 ( $\text{CH=N}$ ), 138.2 (d,  $J_{\text{C,F}} = 3.7$  Hz,  $\text{CAr}$ ), 129.2 (d,  $J_{\text{C,F}} = 10.0$  Hz,  $\text{CHAr}$ ), 114.4 (d,  $J_{\text{C,F}} = 26.2$  Hz,  $\text{CHAr}$ ), 82.6 ( $\text{C}(\text{CH}_3)_3$ ), 75.7 ( $\text{C-CAr}$  or  $\text{C-CO}$ , one quaternary C obscured by solvent resonance), 37.3 ( $\text{CH}_2$ ), 28.2 ( $\text{C}(\text{CH}_3)_3$ ), 26.6 ( $\text{CH}_2$ ), 26.3 ( $\text{C-CH}_3$ ), 22.8 ( $\text{CH}_2$ ), 14.0 ( $\text{CH}_2\text{CH}_3$ ); **HRMS** (ESI): calcd. for  $\text{C}_{19}\text{H}_{28}\text{N}_2\text{O}_2\text{F}^+$   $[\text{M}+\text{H}]^+$  335.2129, found  $m/z$  335.2126.

#### 2.4.22 Synthesis and characterization of *tert*-butyl (4*S*,5*R*)-5-butyl-4-(4-chlorophenyl)-4-methyl-4,5-dihydro-1*H*-imidazole-5-carboxylate **5v**

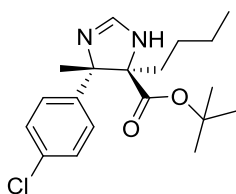

The general procedure B was followed. The desired product was obtained as an off-white solid in 80% yield (45 mg, *trans* diastereoisomer only). The ee was determined by HPLC using a Chiralpak AD column [hexane/*iso*-propanol 90:10,  $\lambda$  220 nm, 1 mL/min]  $t$  (minor) = 7.8 min,  $t$  (major) = 9.1 min (88% ee).

$[\alpha]_D^{25} = +155$  ( $c = 1.0$  in  $\text{CHCl}_3$ ). **M.p.** 130 – 140 °C; **IR** (film)  $\nu = 2959, 1731, 1606, 1136$   $\text{cm}^{-1}$ ;  **$^1\text{H-NMR}$**  (400 MHz,  $\text{CDCl}_3$ )  $\delta$  7.48 (d,  $J = 8.0$  Hz, 2H,  $\text{CHAr}$ ), 7.22 (d,  $J = 8.0$  Hz, 2H,  $\text{CHAr}$ ), 7.05 (s, 1H,  $\text{CH=N}$ ), 1.49 (s, 9H,  $\text{C}(\text{CH}_3)_3$ ), 1.42 (s, 3H,  $\text{CH}_3$ ), 1.06 – 1.00 (m, 4H,  $\text{CH}_2$ ), 0.86 – 0.82 (m, 2H,  $\text{CH}_2$ ), 0.67 (t,  $J = 8.0$  Hz, 3H,  $\text{CH}_3$ );  **$^{13}\text{C-NMR}$**  (125 MHz,  $\text{CDCl}_3$ )  $\delta$  172.0 ( $\text{C=O}$ ), 151.1 ( $\text{CH=N}$ ), 141.0 ( $\text{CAr}$ ), 132.9 ( $\text{CAr}$ ), 129.1 ( $\text{CHAr}$ ), 127.8 ( $\text{CHAr}$ ), 82.6 ( $\text{C}(\text{CH}_3)_3$ ), 75.8 ( $\text{C}$ ), 75.7 ( $\text{C}$ ), 37.3 ( $\text{CH}_2$ ), 28.2 ( $\text{C}(\text{CH}_3)_3$ ), 26.6 ( $\text{CH}_2$ ), 26.2 ( $\text{CH}_3$ ), 22.8 ( $\text{CH}_2$ ), 14.0 ( $\text{CH}_2\text{-CH}_3$ ); **HRMS** (ESI): calcd. for  $\text{C}_{19}\text{H}_{28}\text{N}_2\text{O}_2\text{Cl}^+$   $[\text{M}+\text{H}]^+$  351.1834, found  $m/z$  351.1830.

#### 2.4.23 Synthesis and characterization of *tert*-butyl (4*R*,5*R*)-5-butyl-4-(furan-2-yl)-4-methyl-4,5-dihydro-1*H*-imidazole-5-carboxylate **5w**

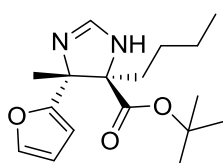

The general procedure B was followed. The desired product was obtained as a colorless oil in 83% yield (41 mg, *trans* diastereoisomer only). The ee was determined by HPLC using a Chiralpak AD column [hexane/*iso*-propanol 95:5,  $\lambda$  220 nm, 1 mL/min]:  $t$  (minor) = 14.7 min,  $t$  (major) = 26.2 min (93% ee).

$[\alpha]_D^{25} = +11$  ( $c = 2.0$  in  $\text{CHCl}_3$ ). **IR** (film)  $\nu = 2980, 1728, 1605, 1142$   $\text{cm}^{-1}$ ;  **$^1\text{H-NMR}$**  (400 MHz,  $\text{CDCl}_3$ )  $\delta$  7.37 (dd,  $J = 1.7, 0.8$  Hz, 1H,  $\text{CHAr}$ ), 7.14 (s, 1H,  $\text{CH=N}$ ), 6.32 (dd,  $J = 3.2, 1.8$  Hz, 1H,  $\text{CHAr}$ ), 6.26 (dd,  $J = 3.2, 0.8$  Hz, 1H,  $\text{CHAr}$ ), 1.53 (s, 3H,  $\text{C-CH}_3$ ), 1.51 (s, 9H,  $\text{C}(\text{CH}_3)_3$ ), 1.43 – 1.30 (m, 1H,  $\text{CH}_2$ ), 1.23 – 1.07 (m, 4H,  $\text{CH}_2$ ), 1.05 – 0.93 (m, 1H,  $\text{CH}_2$ ), 0.73 (t,  $J = 7.3$  Hz, 3H,  $\text{CH}_3$ );  **$^{13}\text{C-NMR}$**  (125 MHz,  $\text{CDCl}_3$ )  $\delta$  171.7 ( $\text{C=O}$ ), 155.8 ( $\text{CAr}$ ), 152.5 ( $\text{CH=N}$ ), 141.6 ( $\text{CHAr}$ ), 110.1 ( $\text{CHAr}$ ), 107.4 ( $\text{CHAr}$ ), 82.2 ( $\text{C}(\text{CH}_3)_3$ ), 35.1 ( $\text{CH}_{2a}\text{-CH}_2$ ), 28.0 ( $\text{C}(\text{CH}_3)_3$ ), 26.9 ( $\text{CH}_{2a}\text{-CH}_2$ ), 23.5 ( $\text{CH}_3$ ), 22.8 ( $\text{CH}_{2a}\text{-CH}_3$ ), 13.8 ( $\text{CH}_{2a}\text{-CH}_3$ ); **HRMS** (ESI): calcd. for  $\text{C}_{17}\text{H}_{27}\text{N}_2\text{O}_3^+$   $[\text{M}+\text{H}]^+$  307.2016, found  $m/z$  307.2013.

#### 2.4.24 Synthesis and characterization of methyl (4*S*,5*R*)-4,5-dimethyl-4-(*p*-tolyl)-4,5-dihydro-1*H*-imidazole-5-carboxylate **5y**

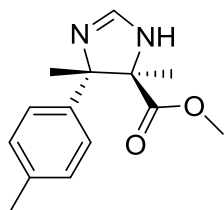

The general procedure B was followed. The desired product was obtained as a white solid in 28% yield (11 mg, *trans* diastereoisomer only). The ee was determined by HPLC using a Chiralpak OJ column [hexane/*iso*-propanol 90:10,  $\lambda$  220 nm, 1 mL/min]: *t* (major) = 8.9 min, *t* (minor) = 15.6 min (87% ee).

$[\alpha]_D^{25} = +166$  ( $c = 0.69$  in  $\text{CHCl}_3$ ). Lit. for the enantiomer:<sup>12</sup>  $[\alpha]_D^{20.7} = -173.6$  ( $c = 0.76$  in  $\text{CHCl}_3$ ). **M.p.**: 107 – 111 °C;  **$^1\text{H-NMR}$**  (400 MHz,  $\text{CDCl}_3$ )  $\delta$  7.44 (d,  $J = 8.3$  Hz, 2H, **CHAr**), 7.26 (s, 1H, **CH=N**), 7.15 (d,  $J = 8.1$  Hz, 2H, **CHAr**), 3.97 (br s, 1H, **NH**), 3.83 (s, 1H,  $\text{CO}_2\text{CH}_3$ ), 2.35 (s, 3H, **CH<sub>3</sub>-CAr**), 1.49 (s, 3H, **CH<sub>3</sub>-C-CAr**), 0.91 (s, 3H, **CH<sub>3</sub>-C-CO**);  **$^{13}\text{C-NMR}$**  (75 MHz,  $\text{CDCl}_3$ )  $\delta$  174.1 (**C=O**), 151.7 (**CH=N**), 138.8 (**CAr**), 137.1 (**CAr**), 128.8 (**CHAr**), 126.9 (**CHAr**), 74.9 (**C-CAr**), 73.5 (**C-CO**), 52.4 ( $\text{CO}_2\text{CH}_3$ ), 26.1 (**CH<sub>3</sub>-C-CAr**), 24.4 (**CH<sub>3</sub>-C-CO**), 21.1 (**CH<sub>3</sub>-CAr**). Spectroscopical data are in agreement with the reported ones;<sup>12</sup> the chemical shift of the **CH** on the imidazoline moves in the range 7.3 – 7.0 ppm depending on sample concentration, presumably because of H-bonding interactions.

<sup>12</sup> G. Lu, T. Yoshino, H. Morimoto, S. Matsunaga, M. Shibasaki, *Angew. Chem. Int. Ed.* **2011**, *50*, 4382–4385.

## 2.5 Synthesis of imidazoline derivatives

### 2.5.1 Synthesis of (2*R*,3*S*)-2,3-diamino-2-methyl-3-phenylbutanoic acid **6c**

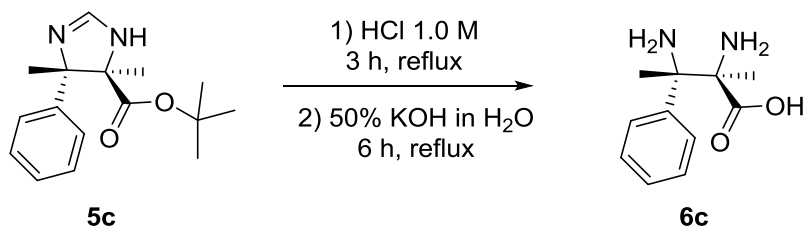

Imidazoline **5c** (15 mg, 0.055 mmol) was dissolved in HCl 1.0 M (0.3 mL). The resultant solution was refluxed for 3 hours. After solvent evaporation the residue was dissolved in aqueous 50% (w/w) KOH solution (0.3 mL) and refluxed for 6 hours. The reaction mixture was cooled to 0 °C and neutralized with 1.0 M aqueous HCl. The solvents were removed in vacuo and the remaining residue was loaded on a Dowex H<sup>+</sup> ion exchange resin. The column was flushed with water, dioxane, more water and eluted with 2.0 M aqueous ammonia. The ammoniacal fraction was evaporated to afford diaminoacid **6c** as a white solid in 69% yield (8 mg).

$[\alpha]_D^{20}$ : + 20 ( $c = 0.75$  in MeOH); **m.p.** 160 – 161 °C; **IR** (film):  $\nu = 3345, 2973, 1600, 1447, 1390, 1359, 700 \text{ cm}^{-1}$ ; **<sup>1</sup>H-NMR** (500 MHz, D<sub>2</sub>O):  $\delta$  7.47 (s, 5H, C<sub>Ar</sub>H), 1.79 (s, 3H, CH<sub>3</sub>CC<sub>Ar</sub>), 1.44 (s, 3H, CH<sub>3</sub>CCO<sub>2</sub>H); **<sup>13</sup>C-NMR** (125 MHz, D<sub>2</sub>O)  $\delta$  178.8 (COOH), 139.0 (C<sub>Ar</sub>), 129.1 (C<sub>Ar</sub>H), 128.9 (C<sub>Ar</sub>H), 126.7 (C<sub>Ar</sub>H), 64.5 (CCOOH), 60.5 (CC<sub>Ar</sub>), 21.3 (CH<sub>3</sub>CC<sub>Ar</sub>), 20.5 (CH<sub>3</sub>CCO<sub>2</sub>H); **HRMS** (ESI): calcd. for C<sub>11</sub>H<sub>16</sub>N<sub>2</sub>NaO<sub>2</sub><sup>+</sup> [M+Na]<sup>+</sup> 231.1104, found  $m/z$  231.1109.

### 3 $^1\text{H-NMR}$ and $^{13}\text{C-NMR}$ of starting materials and ligands

#### 3.1 $^1\text{H-NMR}$ and $^{13}\text{C-NMR}$ of isopropyl *N*-formylalanine 2b'

##### $^1\text{H-NMR}$

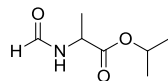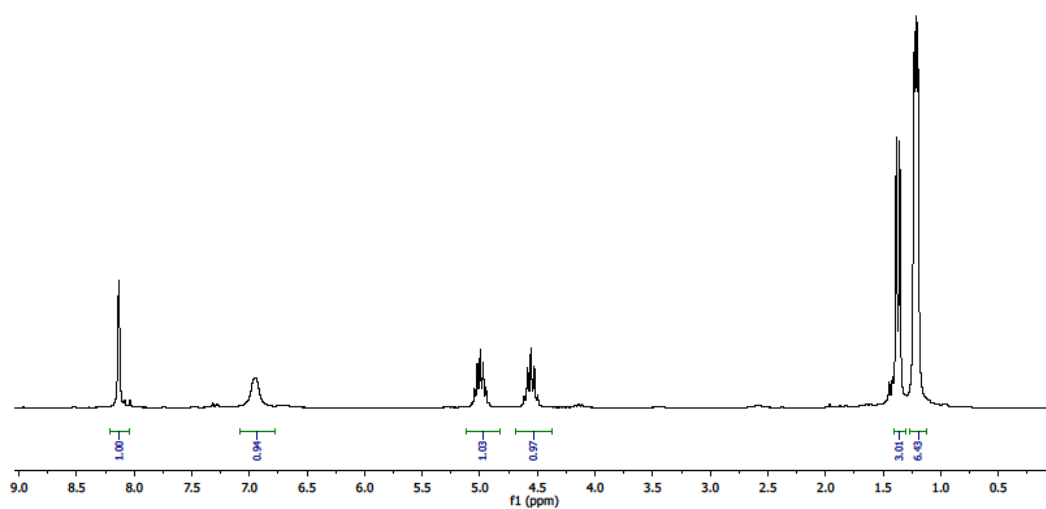

##### $^{13}\text{C-NMR}$

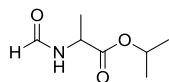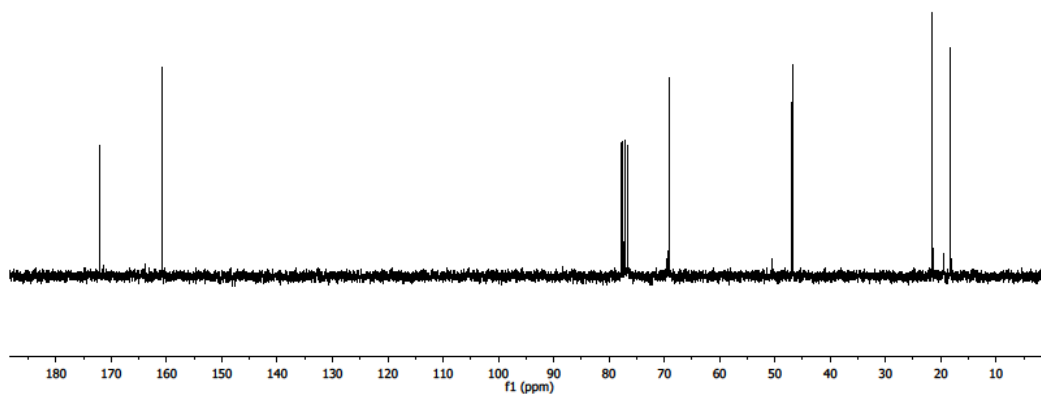

### 3.2 $^1\text{H-NMR}$ and $^{13}\text{C-NMR}$ of isopropyl 2-isocyanopropanoate 2b

#### $^1\text{H-NMR}$

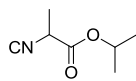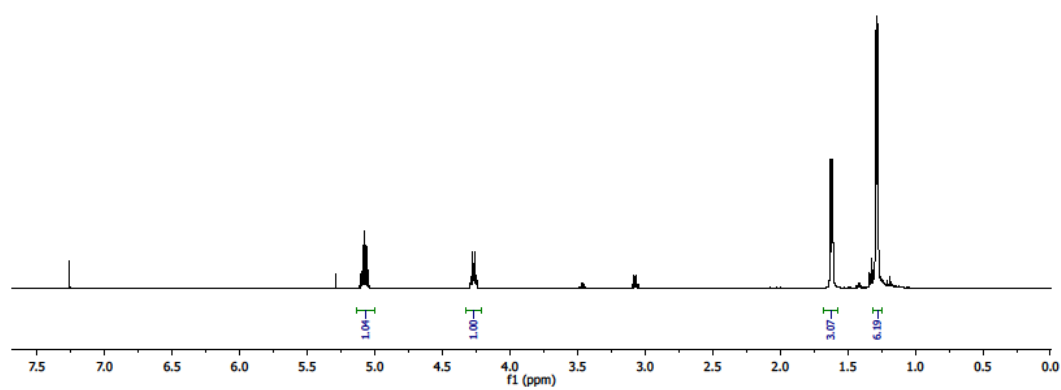

#### $^{13}\text{C-NMR}$

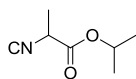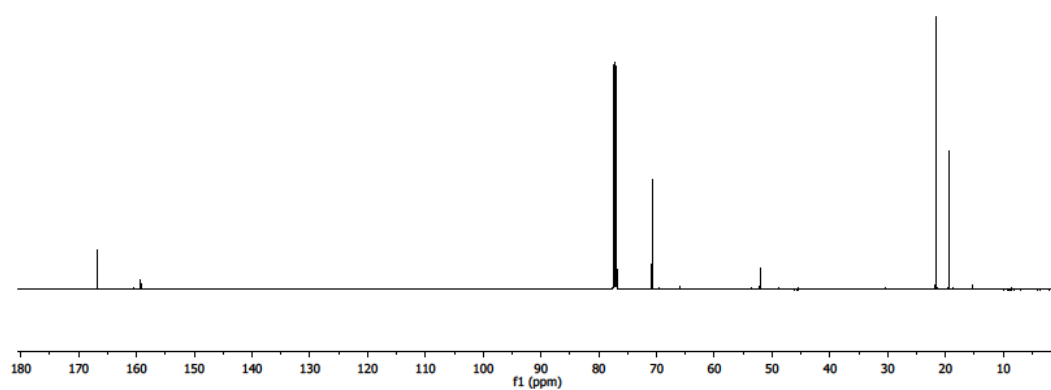

### 3.3 $^1\text{H-NMR}$ and $^{13}\text{C-NMR}$ of *tert*-butyl 2-isocyanopropanoate **2c**

#### $^1\text{H-NMR}$

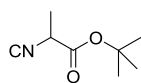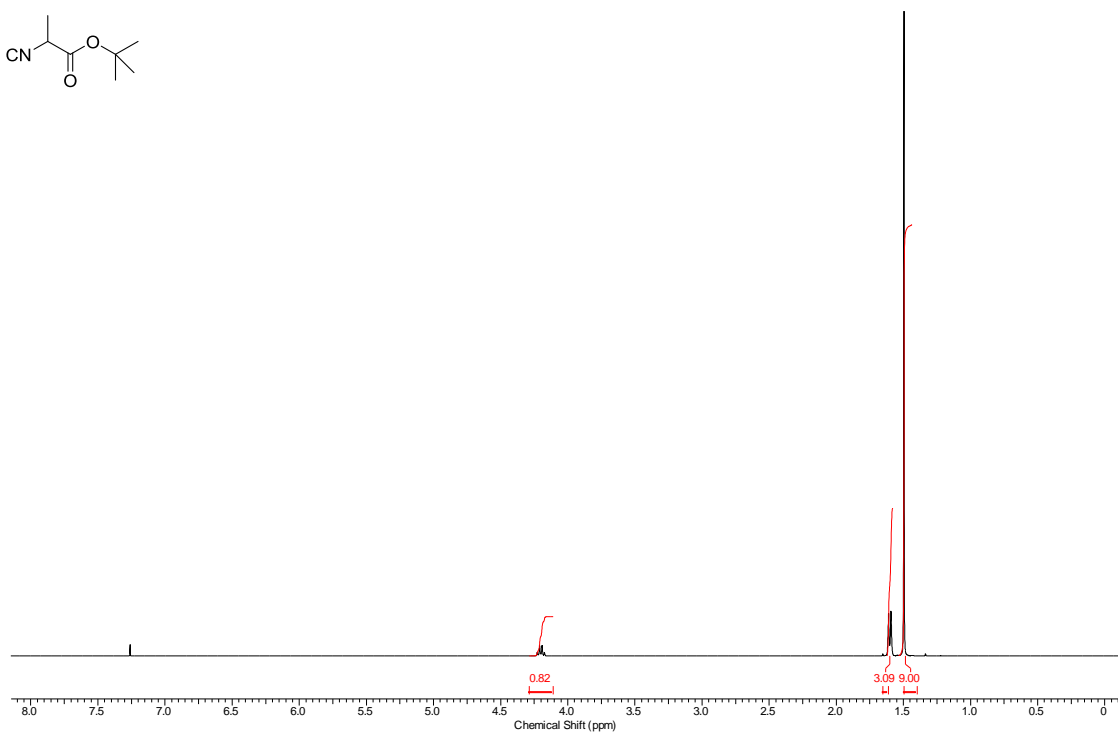

#### $^{13}\text{C-NMR}$

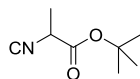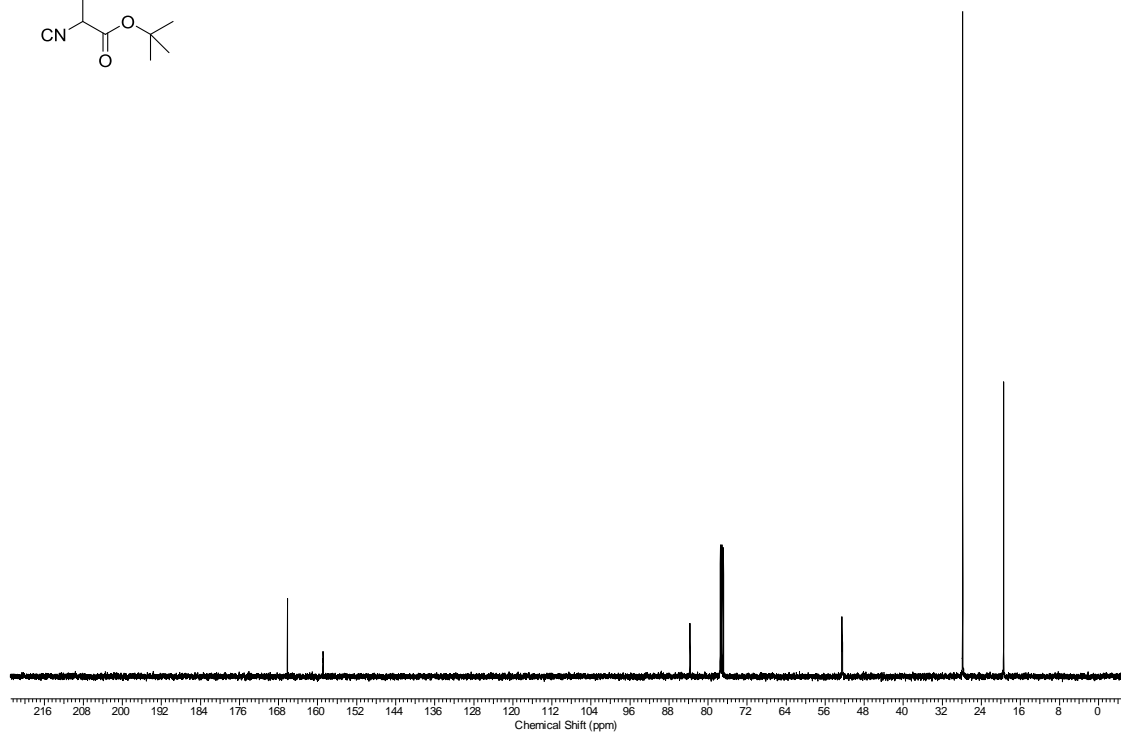



### 3.4 $^1\text{H-NMR}$ and $^{13}\text{C-NMR}$ of diphenylmethyl *N*-formylalanine **2e'**

#### $^1\text{H-NMR}$

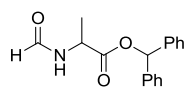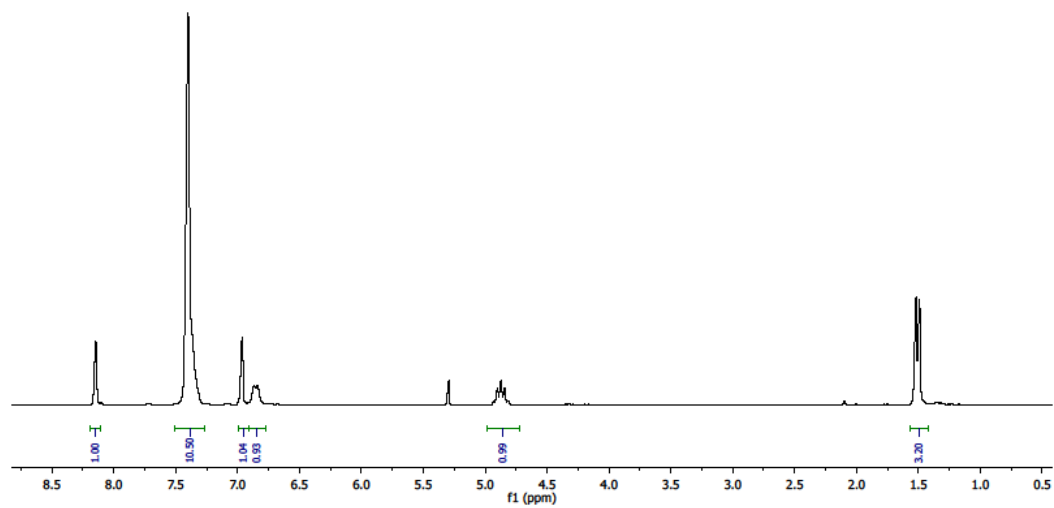

#### $^{13}\text{C-NMR}$

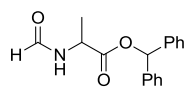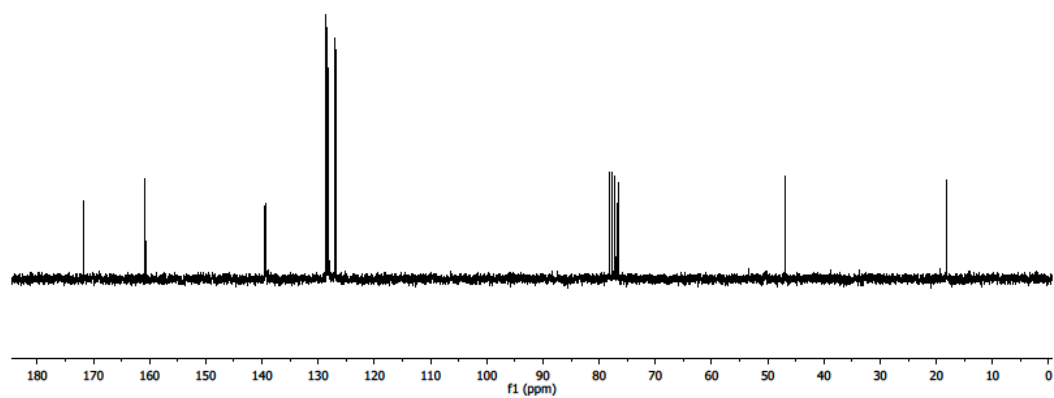

### 3.5 $^1\text{H-NMR}$ and $^{13}\text{C-NMR}$ of diphenylmethyl 2-isocyanopropanoate **2e**

#### $^1\text{H-NMR}$

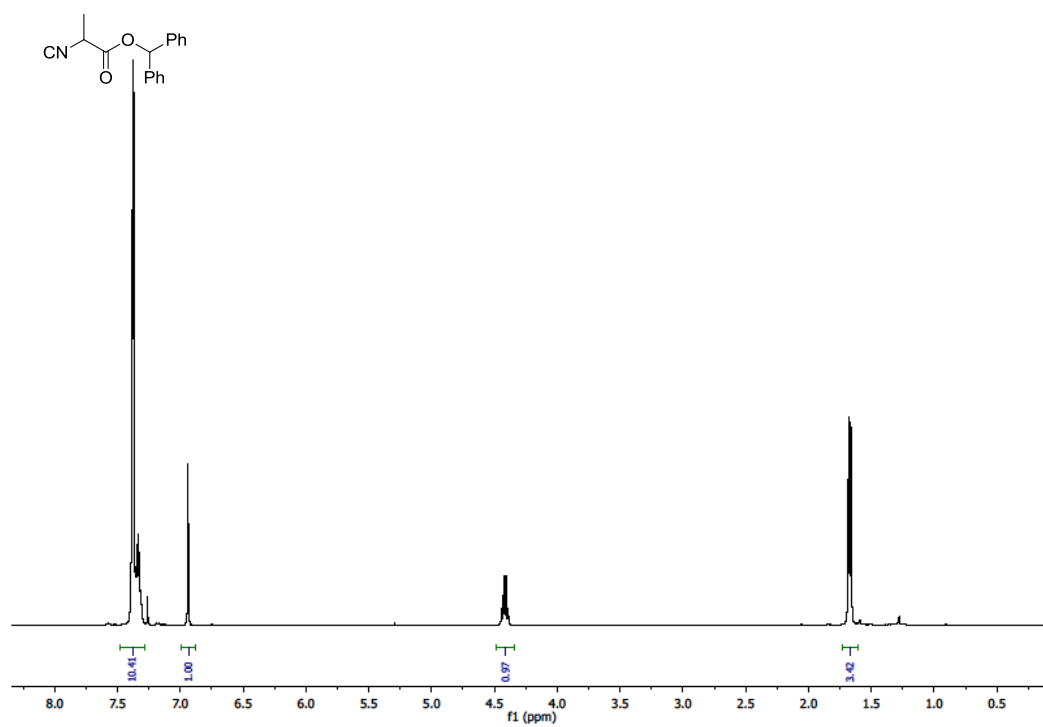

#### $^{13}\text{C-NMR}$

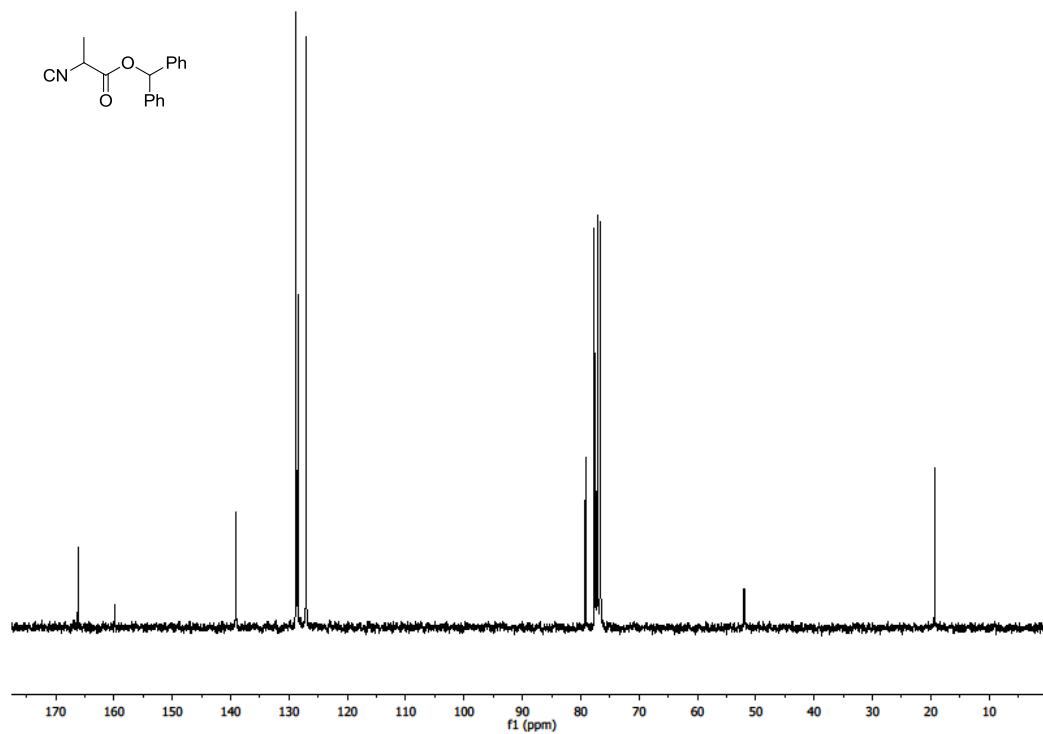

### 3.6 $^1\text{H-NMR}$ and $^{13}\text{C-NMR}$ of *tert*-butyl 2-formamidobutanoate **2f'**

#### $^1\text{H-NMR}$

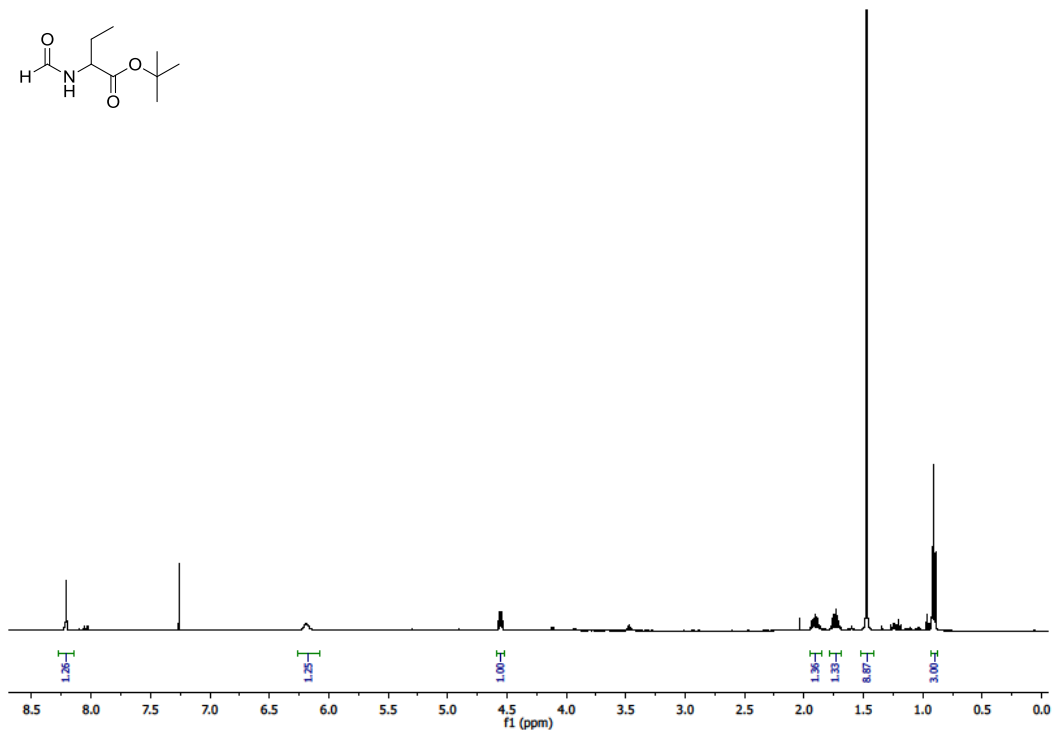

#### $^{13}\text{C-NMR}$

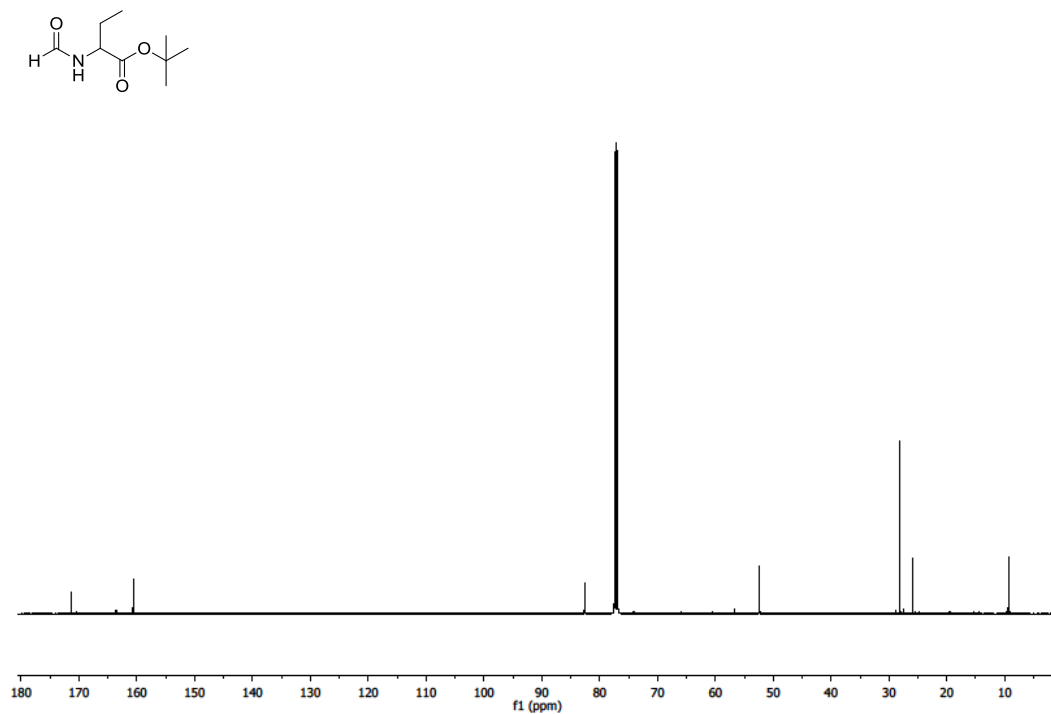

### 3.7 $^1\text{H-NMR}$ and $^{13}\text{C-NMR}$ of *tert*-butyl 2-isocyanobutanoate **2f**

#### $^1\text{H-NMR}$

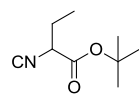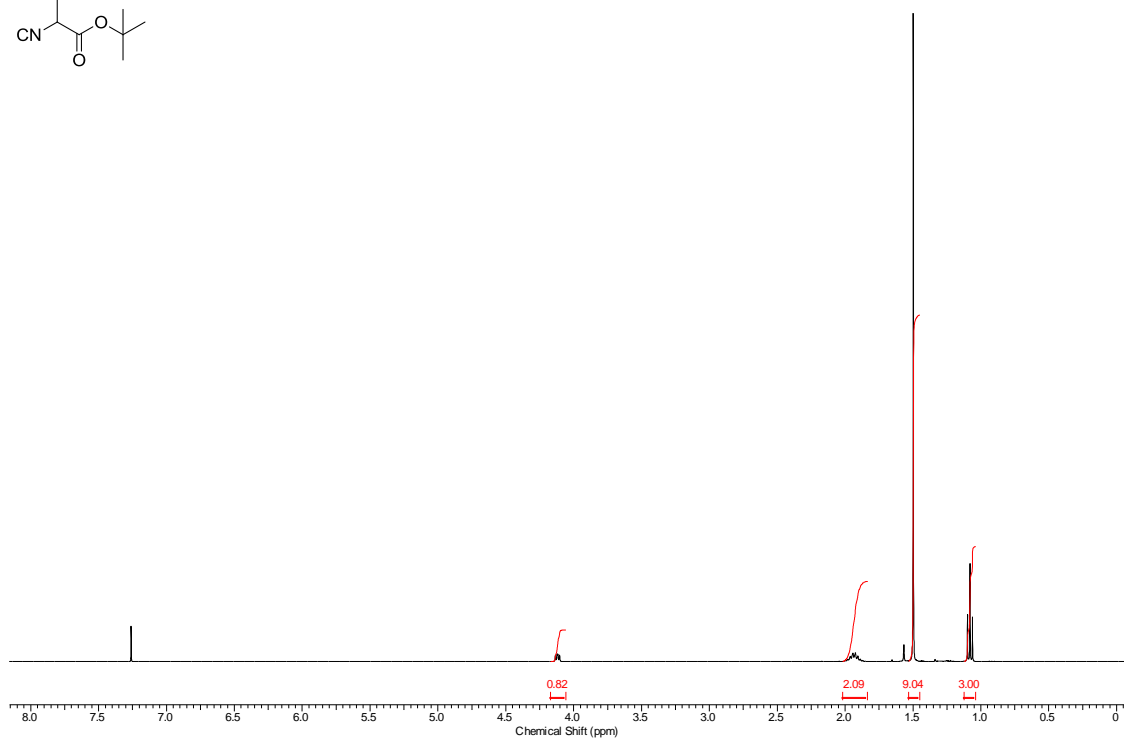

#### $^{13}\text{C-NMR}$

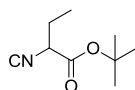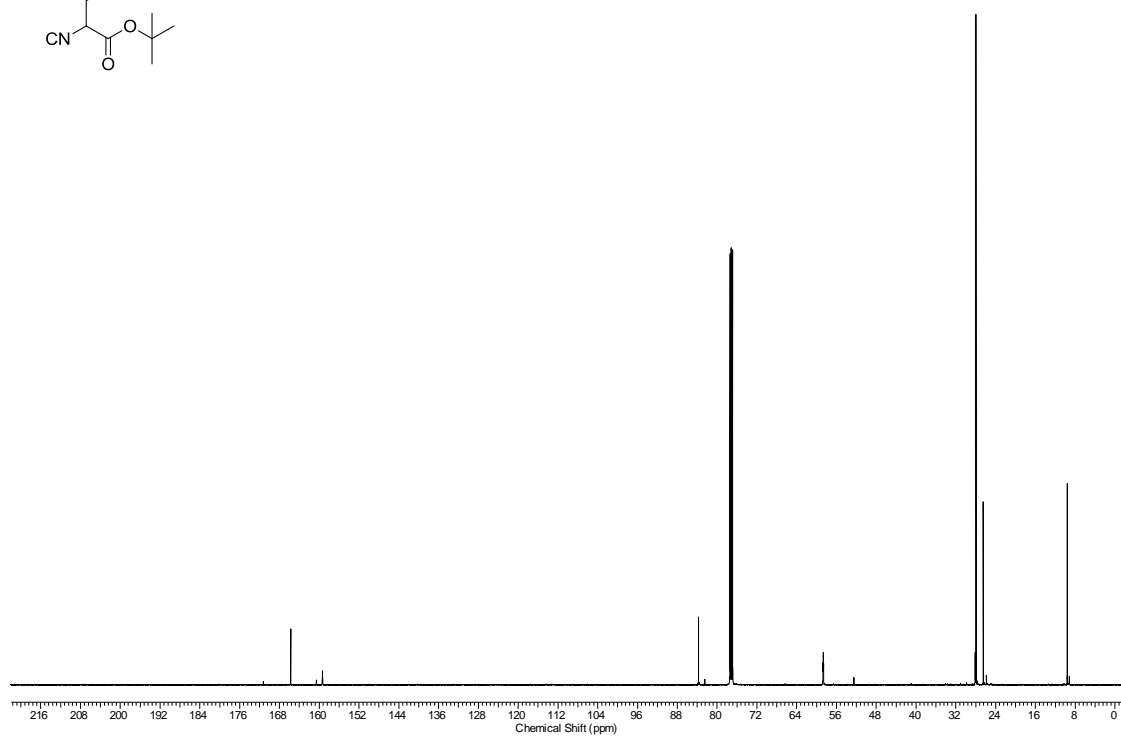

### 3.8 $^1\text{H-NMR}$ and $^{13}\text{C-NMR}$ of *ter*-butyl 2-isocyanohexanoate 2g

#### $^1\text{H-NMR}$

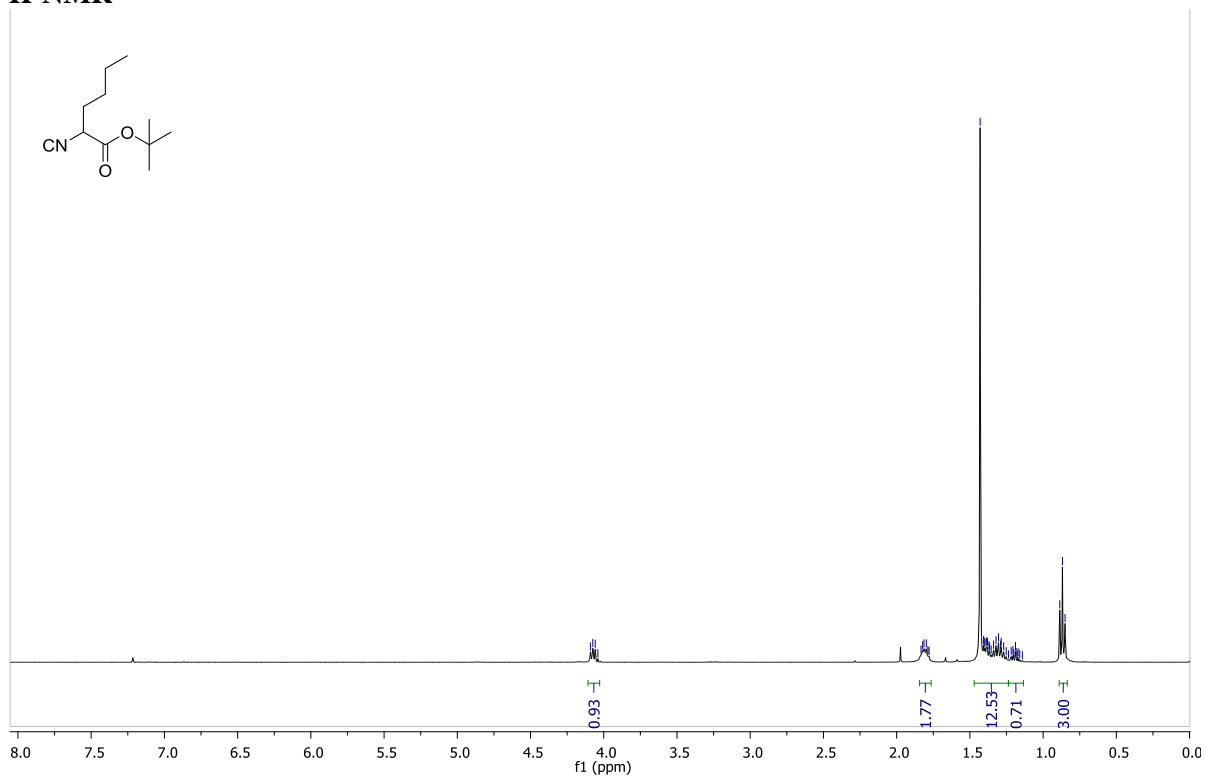

#### $^{13}\text{C-NMR}$

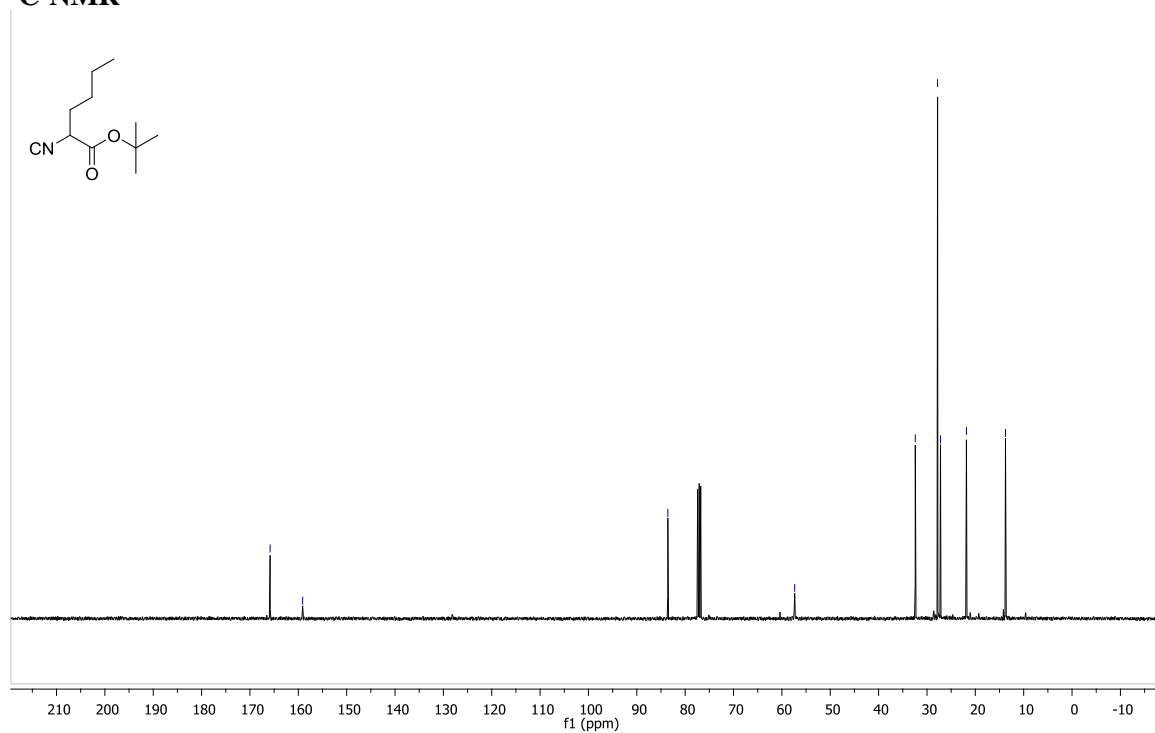

### 3.9 $^1\text{H-NMR}$ and $^{13}\text{C-NMR}$ of ligand 1d

#### $^1\text{H-NMR}$

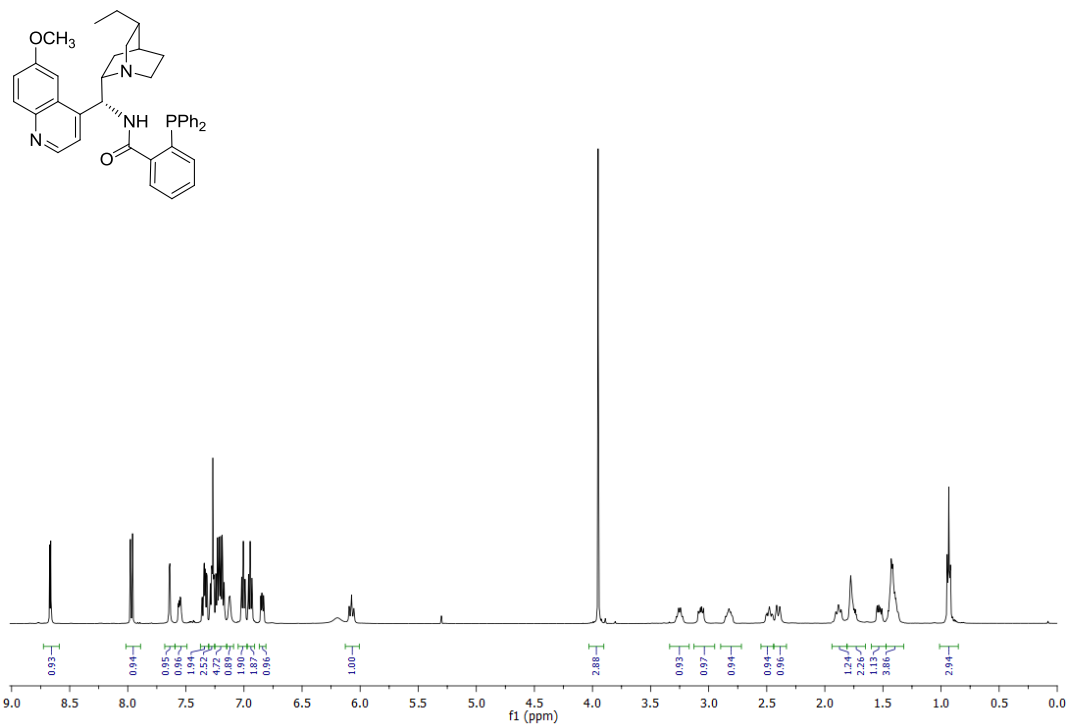

#### $^{13}\text{C-NMR}$

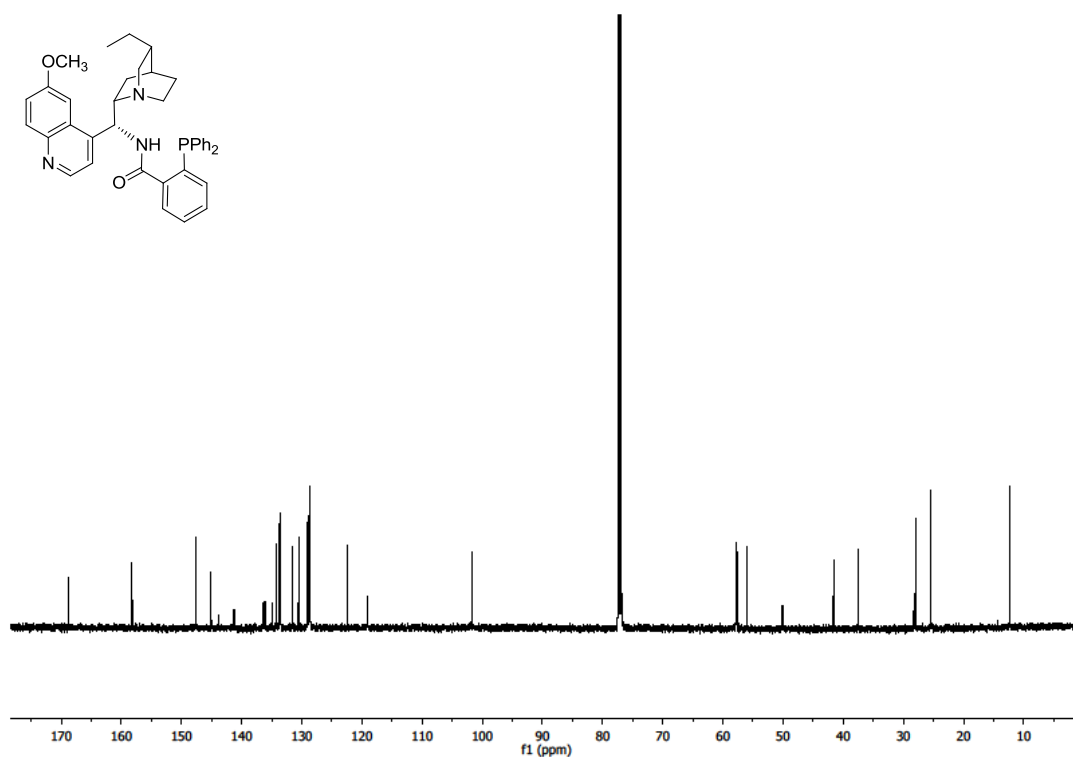

### 3.10 $^1\text{H}$ -NMR and $^{13}\text{C}$ -NMR of ligand 1e

#### $^1\text{H}$ -NMR

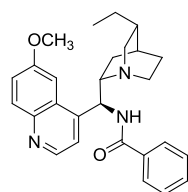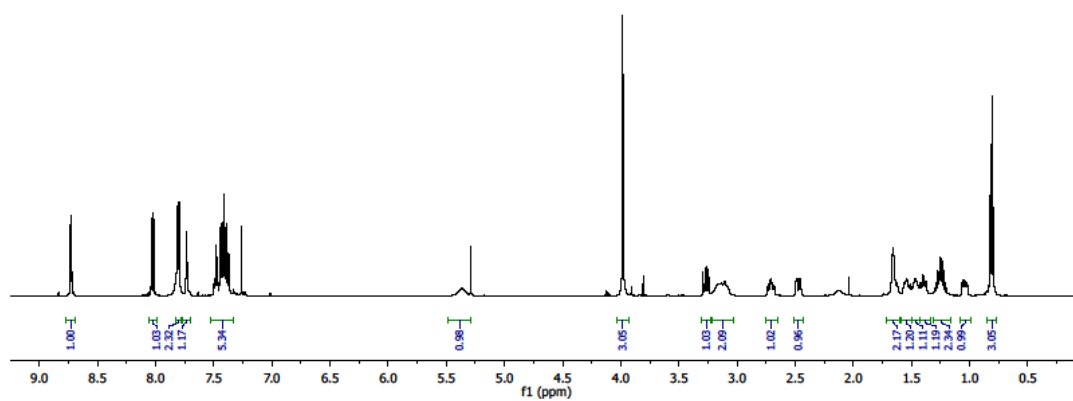

#### $^{13}\text{C}$ -NMR

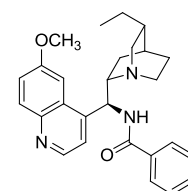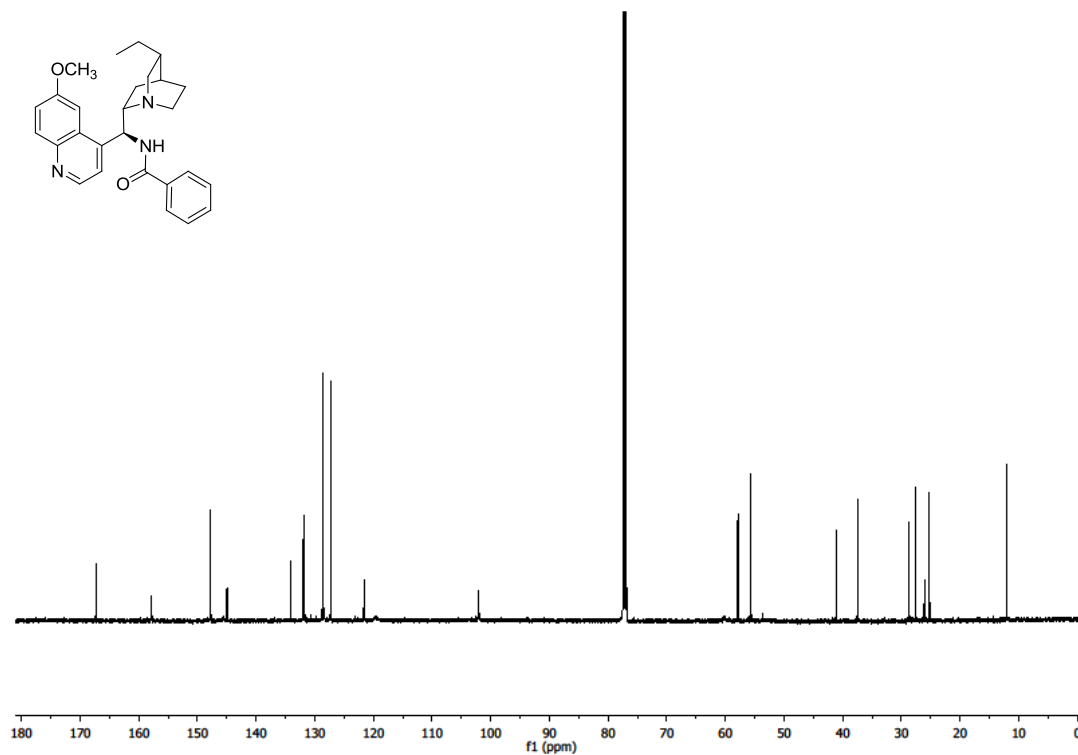

### 3.11 $^1\text{H-NMR}$ and $^{13}\text{C-NMR}$ of ligand 1f

#### $^1\text{H-NMR}$

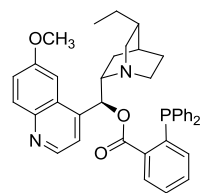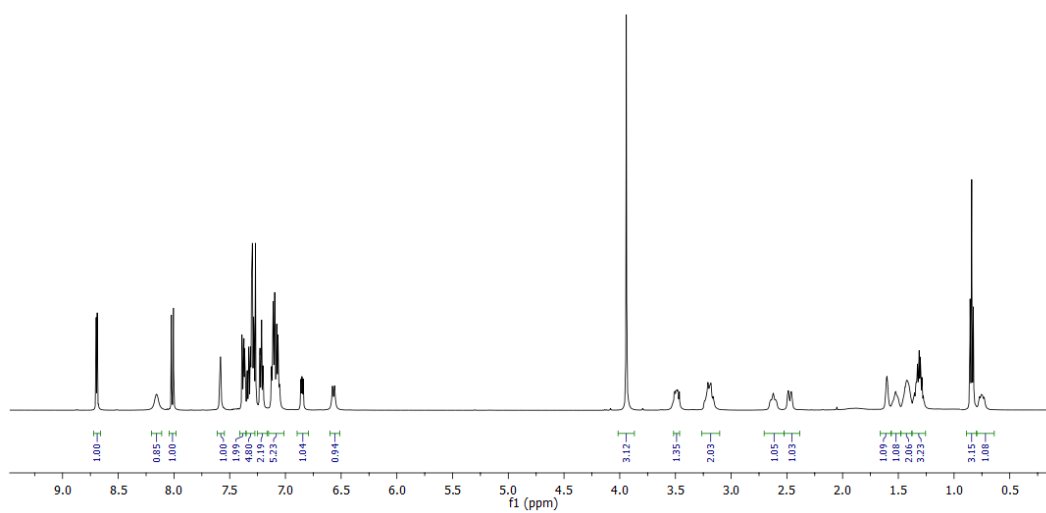

#### $^{13}\text{C-NMR}$

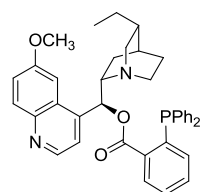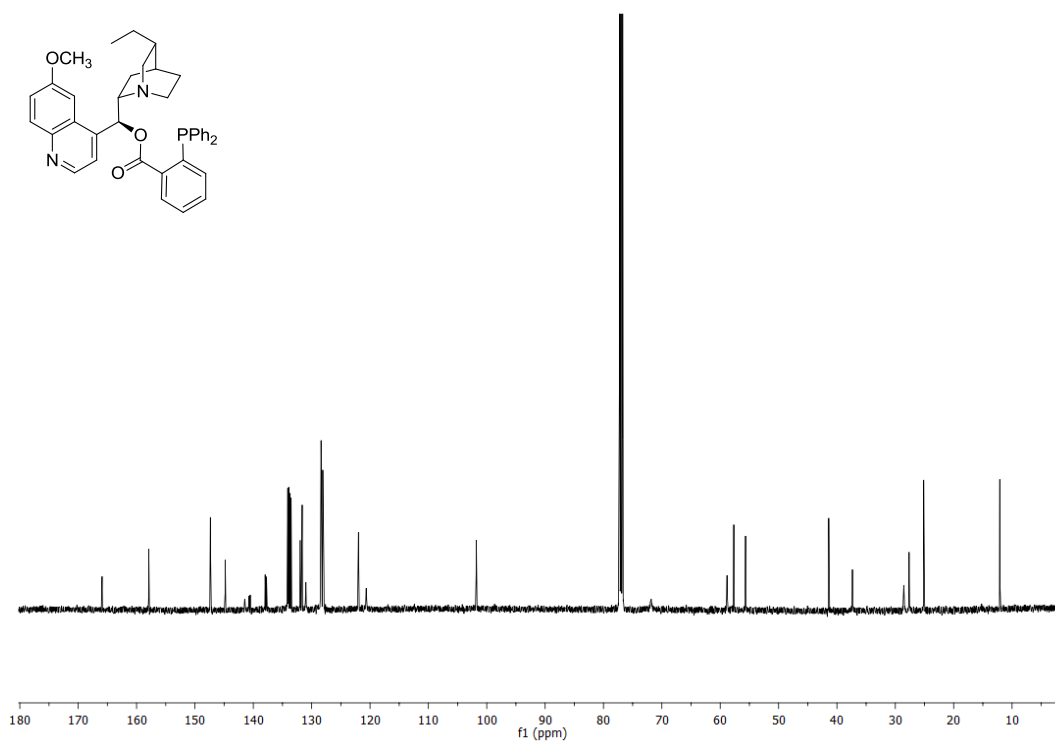



### 3.12 $^1\text{H}$ -NMR and $^{13}\text{C}$ -NMR of ligand 1g

#### $^1\text{H}$ -NMR

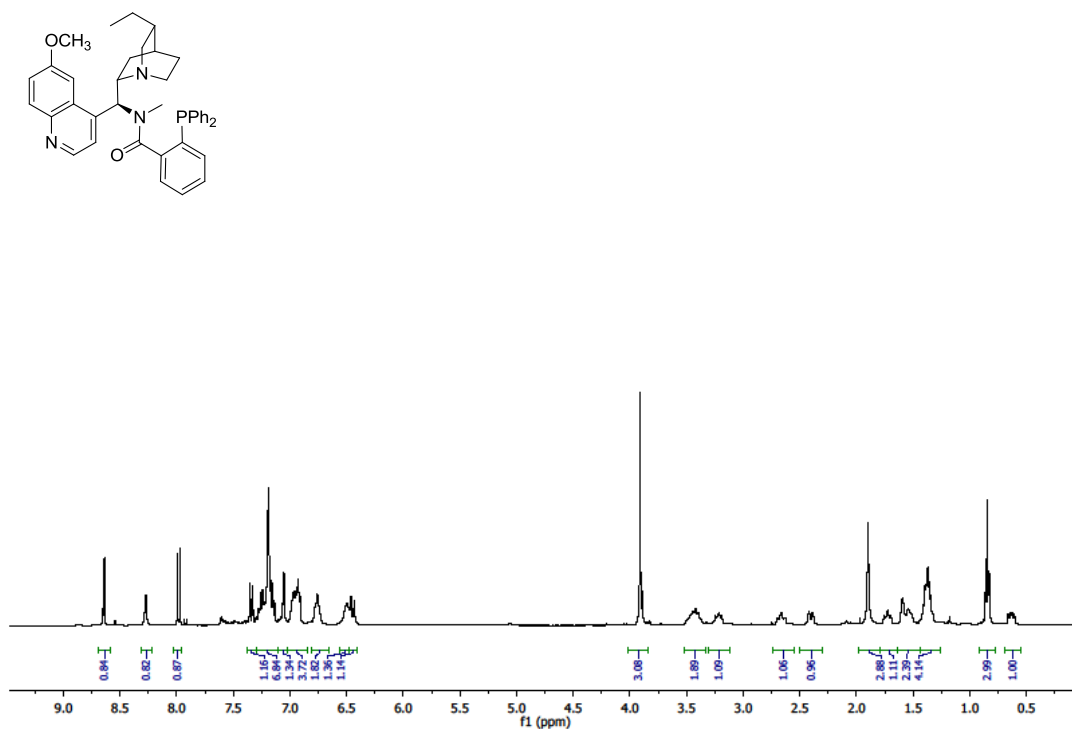

#### $^{13}\text{C}$ -NMR

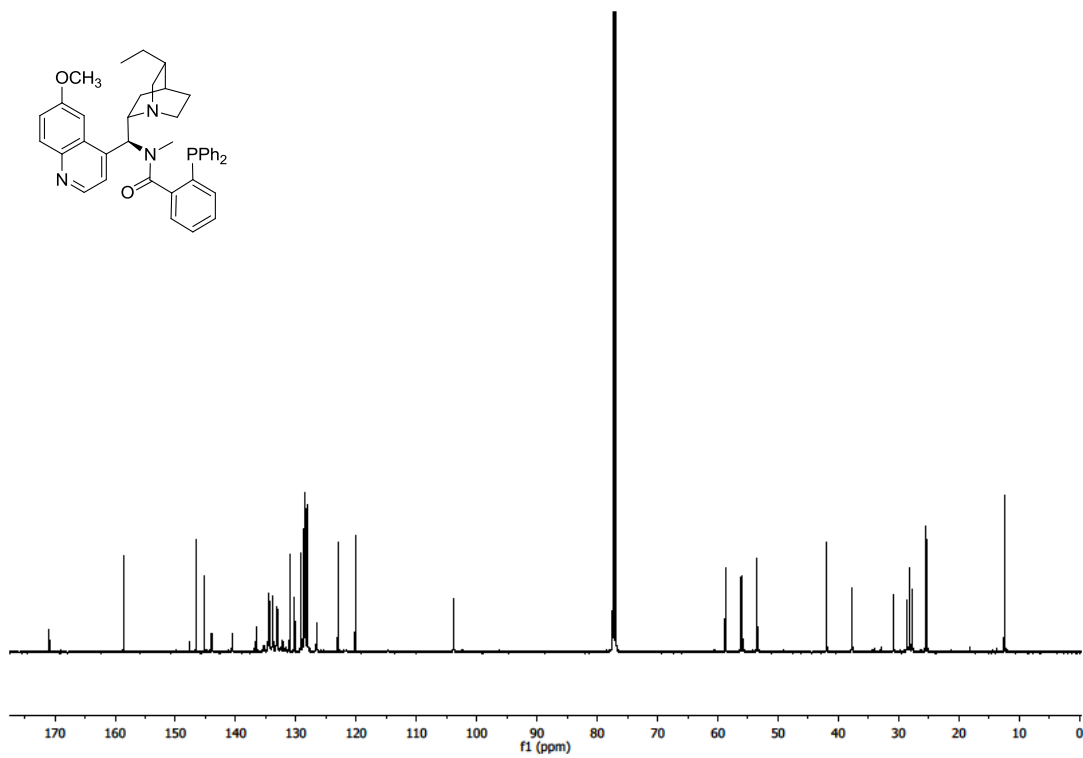

## 4 $^1\text{H-NMR}$ , $^{13}\text{C-NMR}$ , NOE and HPLC traces of imidazolines 5

### 4.1 $^1\text{H-NMR}$ , $^{13}\text{C-NMR}$ and HPLC traces of imidazoline 5a

#### $^1\text{H-NMR}$

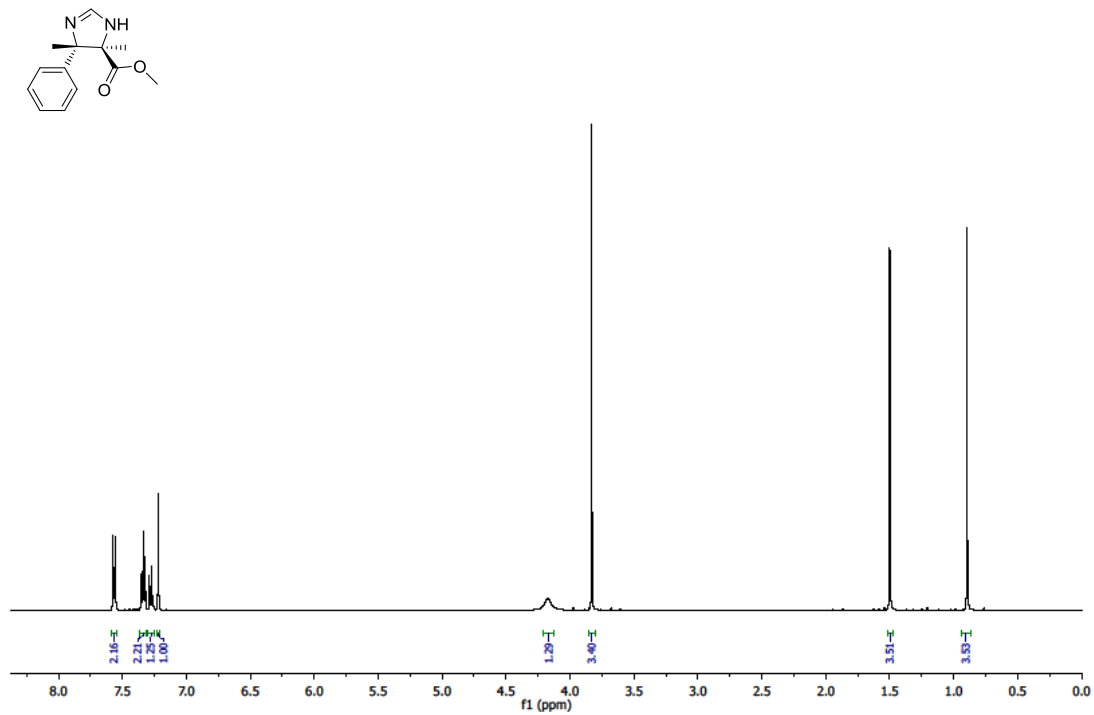

#### $^{13}\text{C-NMR}$

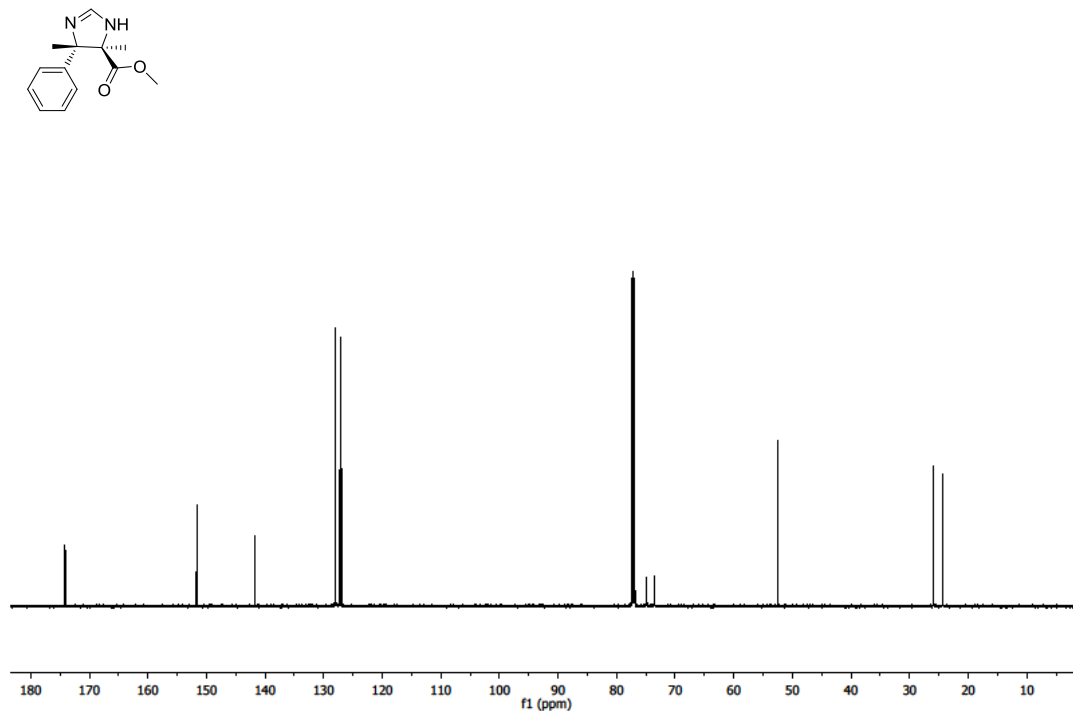

## HPLC traces of imidazoline 5a

### Racemic

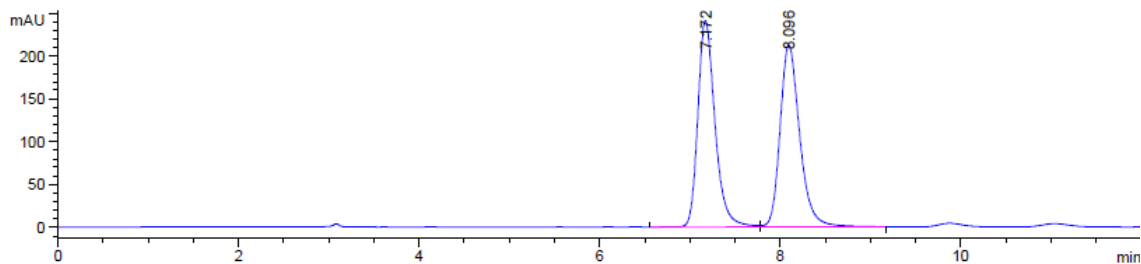

Signal 2: DAD1 B, Sig=230,16 Ref=360,100

| Peak # | RetTime [min] | Type | Width [min] | Area [mAU*s] | Height [mAU] | Area %  |
|--------|---------------|------|-------------|--------------|--------------|---------|
| 1      | 7.172         | VV   | 0.2024      | 3192.17114   | 241.26320    | 49.7568 |
| 2      | 8.096         | VB   | 0.2331      | 3223.37402   | 212.39865    | 50.2432 |

Totals : 6415.54517 453.66185

### Enantioenriched

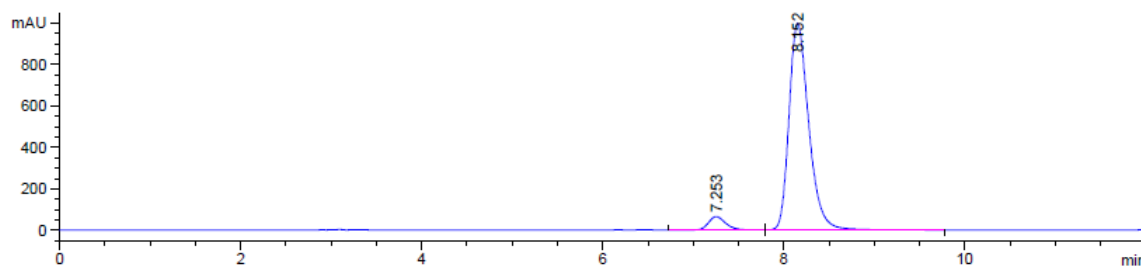

Signal 2: DAD1 B, Sig=230,16 Ref=360,100

| Peak # | RetTime [min] | Type | Width [min] | Area [mAU*s] | Height [mAU] | Area %  |
|--------|---------------|------|-------------|--------------|--------------|---------|
| 1      | 7.253         | VV   | 0.2098      | 905.01654    | 65.24442     | 5.6049  |
| 2      | 8.152         | VB   | 0.2341      | 1.52420e4    | 998.40479    | 94.3951 |

Totals : 1.61470e4 1063.64921

## 4.2 $^1\text{H-NMR}$ , $^{13}\text{C-NMR}$ and HPLC traces of imidazoline 5b

### $^1\text{H-NMR}$

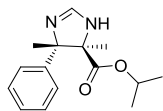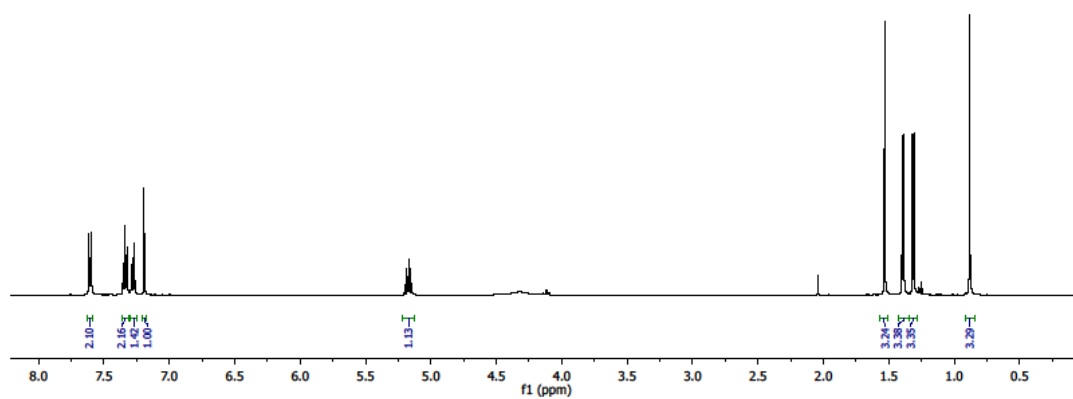

### $^{13}\text{C-NMR}$

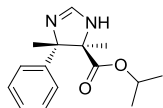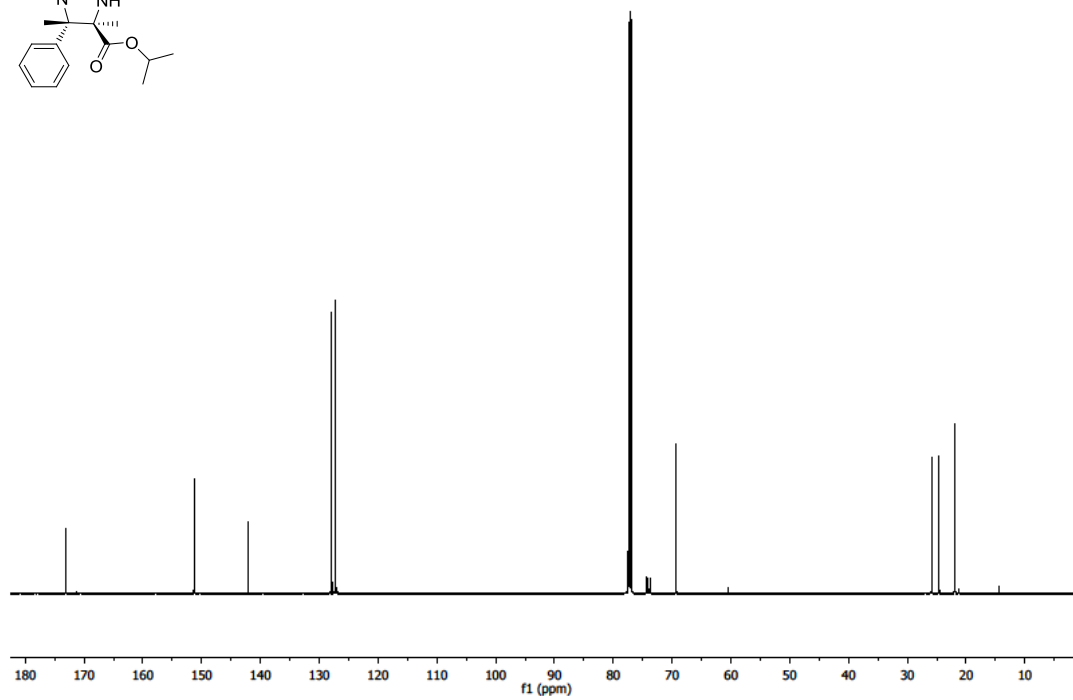

## HPLC traces of imidazoline 5b

### Racemic

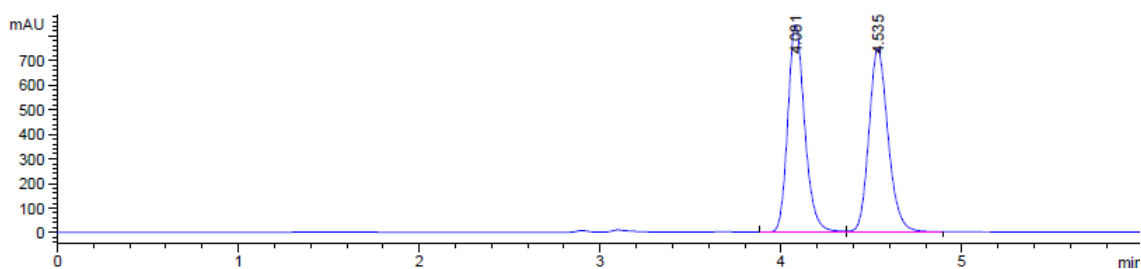

Signal 2: DAD1 B, Sig=230,16 Ref=360,100

| Peak # | RetTime [min] | Type | Width [min] | Area [mAU*s] | Height [mAU] | Area %  |
|--------|---------------|------|-------------|--------------|--------------|---------|
| 1      | 4.081         | VV   | 0.1001      | 5508.81689   | 844.99323    | 48.8619 |
| 2      | 4.535         | VV   | 0.1148      | 5561.21484   | 747.09430    | 51.1381 |

Totals : 1.10700e4 1592.08753

### Enantioenriched

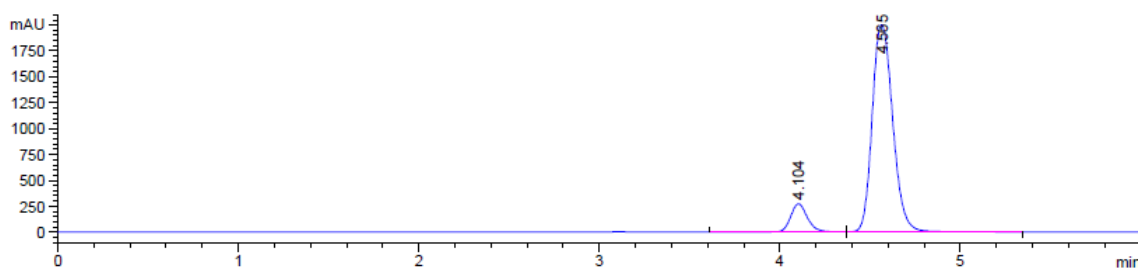

Signal 2: DAD1 B, Sig=230,16 Ref=360,100

| Peak # | RetTime [min] | Type | Width [min] | Area [mAU*s] | Height [mAU] | Area %  |
|--------|---------------|------|-------------|--------------|--------------|---------|
| 1      | 4.104         | VV   | 0.1016      | 1822.99377   | 273.94739    | 10.2690 |
| 2      | 4.565         | VV   | 0.1249      | 1.59295e4    | 2001.39014   | 89.7310 |

Totals : 1.77525e4 2275.33752

### 4.3 $^1\text{H-NMR}$ , $^{13}\text{C-NMR}$ and HPLC traces of imidazoline 5c

#### $^1\text{H-NMR}$

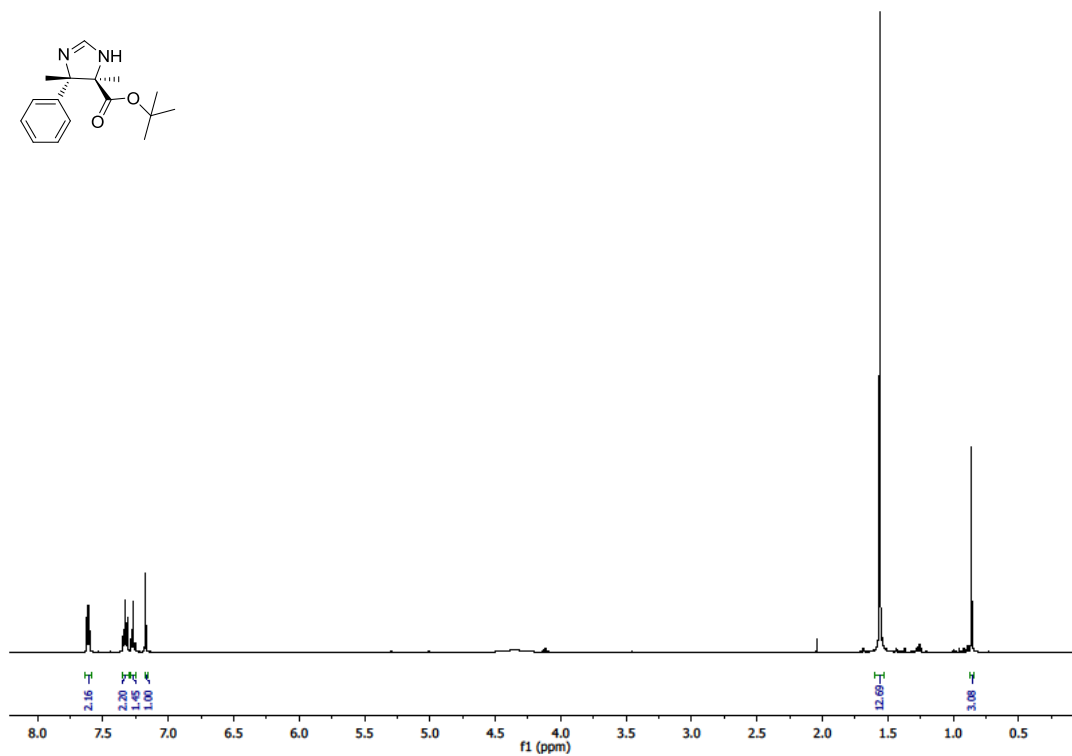

#### $^{13}\text{C-NMR}$

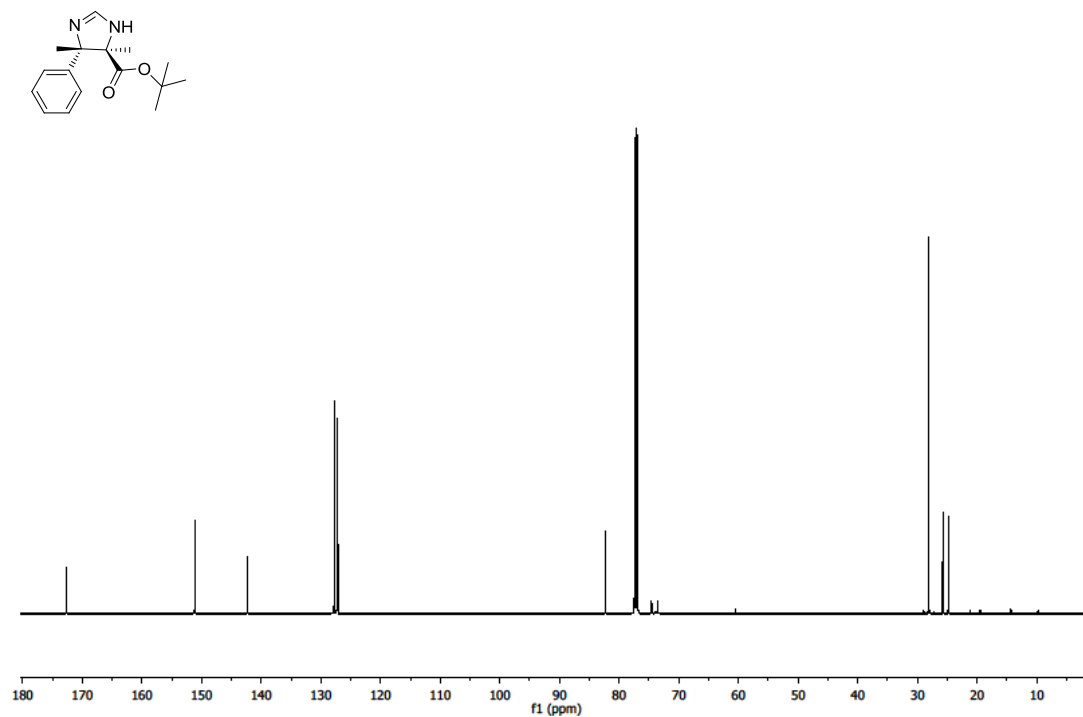

## HPLC traces of imidazoline 5c

### Racemic

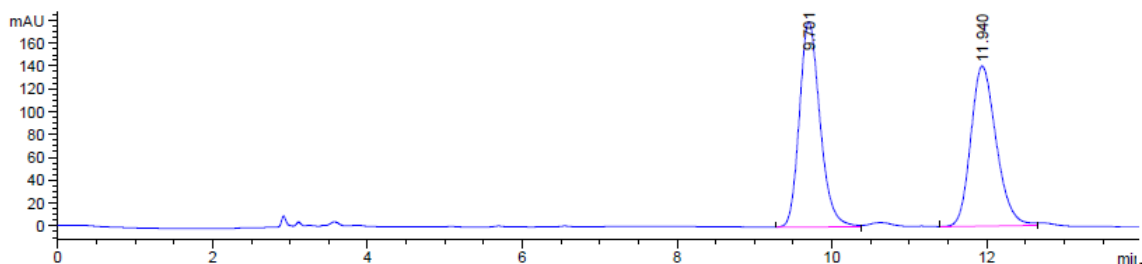

| Peak # | RetTime [min] | Type | Width [min] | Area [mAU*s] | Height [mAU] | Area %  |
|--------|---------------|------|-------------|--------------|--------------|---------|
| 1      | 9.701         | BV   | 0.2858      | 3326.81274   | 179.85448    | 50.9161 |
| 2      | 11.940        | VB   | 0.3527      | 3207.09741   | 140.27768    | 49.0839 |

### Enantioenriched

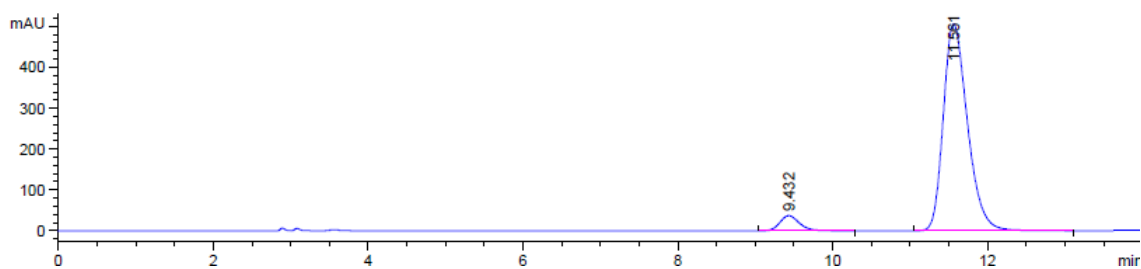

| Peak # | RetTime [min] | Type | Width [min] | Area [mAU*s] | Height [mAU] | Area %  |
|--------|---------------|------|-------------|--------------|--------------|---------|
| 1      | 9.432         | BB   | 0.2682      | 646.78839    | 36.94935     | 5.5873  |
| 2      | 11.561        | BB   | 0.3322      | 1.09293e4    | 505.66959    | 94.4127 |





## HPLC traces of imidazoline 5d

### Racemic

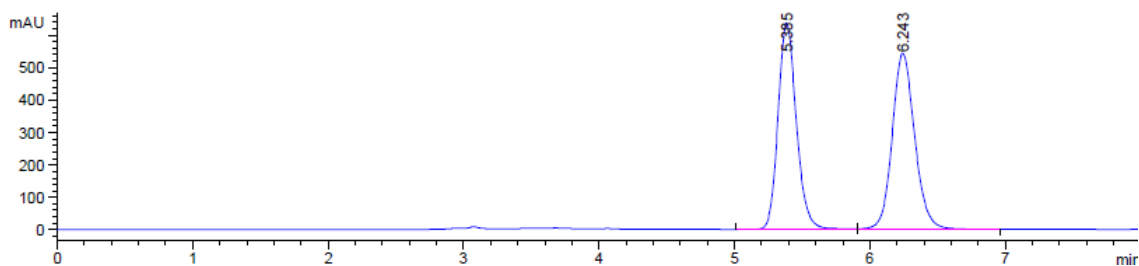

Signal 2: DAD1 B, Sig=230,16 Ref=360,100

| Peak # | RetTime [min] | Type | Width [min] | Area [mAU*s] | Height [mAU] | Area %  |
|--------|---------------|------|-------------|--------------|--------------|---------|
| 1      | 5.385         | BV   | 0.1461      | 6011.99170   | 636.97437    | 48.8733 |
| 2      | 6.243         | VB   | 0.1780      | 6289.17480   | 543.43011    | 51.1267 |

Totals : 1.23012e4 1180.40448

### Enantioenriched

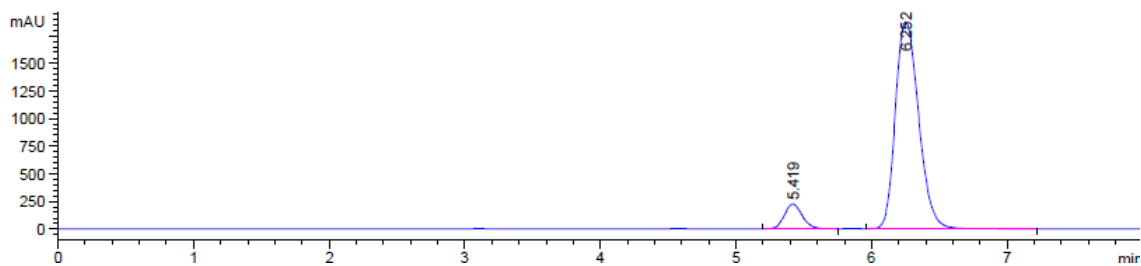

Signal 2: DAD1 B, Sig=230,16 Ref=360,100

| Peak # | RetTime [min] | Type | Width [min] | Area [mAU*s] | Height [mAU] | Area %  |
|--------|---------------|------|-------------|--------------|--------------|---------|
| 1      | 5.419         | VV   | 0.1453      | 2113.89160   | 225.63458    | 8.5841  |
| 2      | 6.252         | VV   | 0.1881      | 2.25119e4    | 1874.10986   | 91.4159 |

Totals : 2.46258e4 2099.74445

#### 4.5 $^1\text{H-NMR}$ , $^{13}\text{C-NMR}$ and HPLC traces of imidazoline 5e

##### $^1\text{H-NMR}$

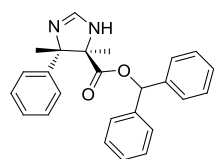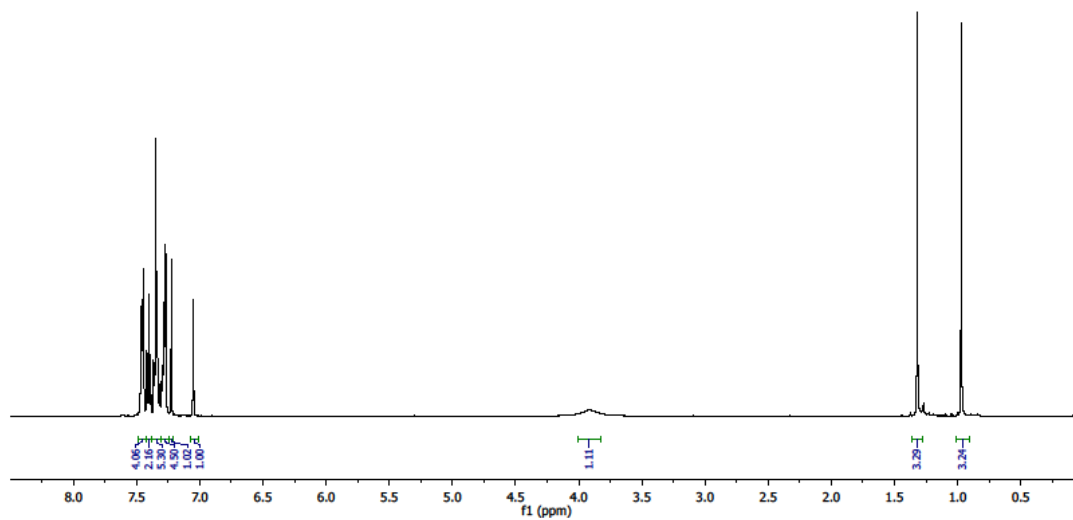

##### $^{13}\text{C-NMR}$

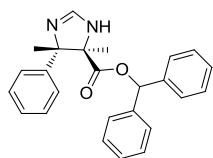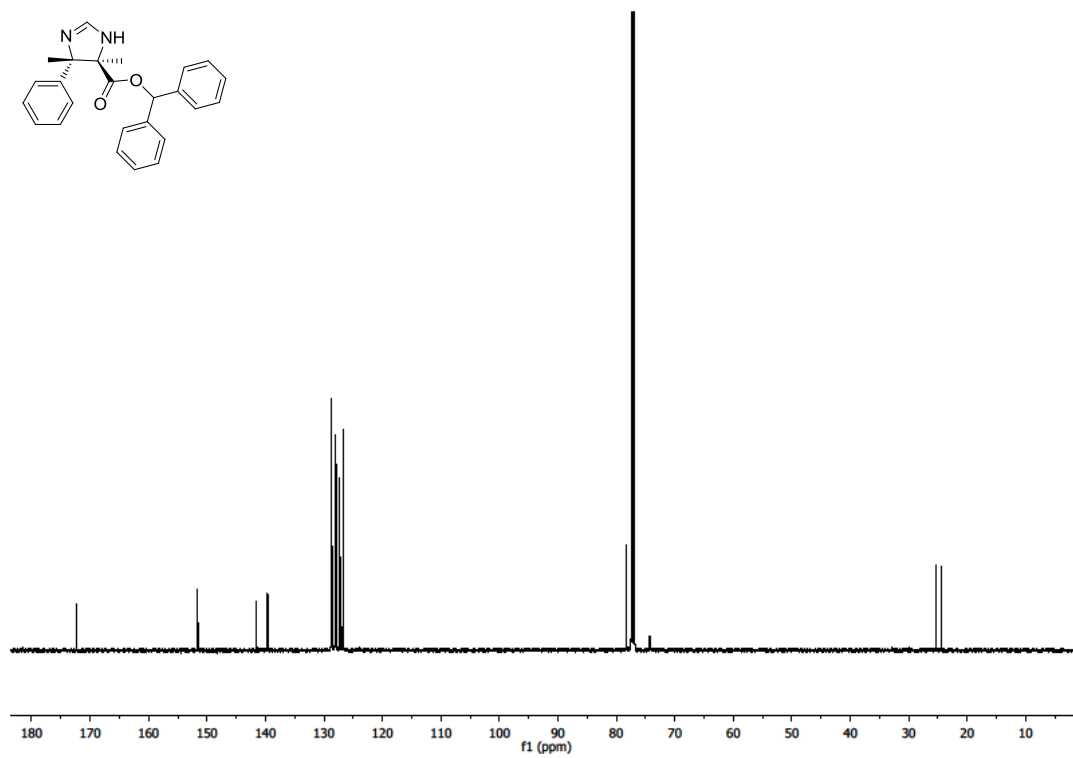

## HPLC traces of racemic imidazoline 5e

### Racemic

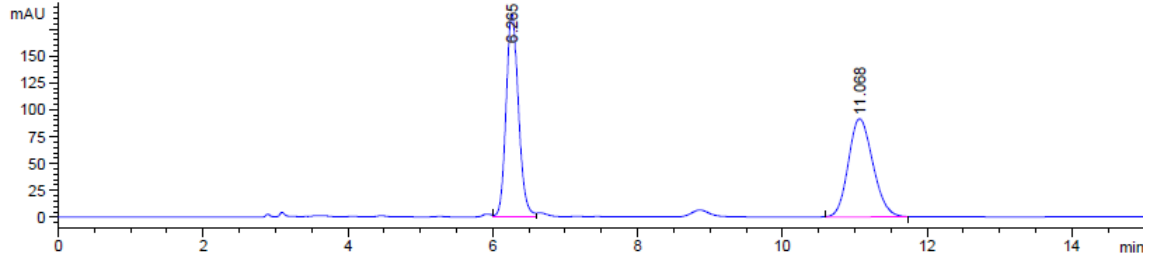

Signal 5: DAD1 E, Sig=240,16 Ref=360,100

| Peak # | RetTime [min] | Type | Width [min] | Area [mAU*s] | Height [mAU] | Area %  |
|--------|---------------|------|-------------|--------------|--------------|---------|
| 1      | 6.265         | VV   | 0.1819      | 2233.90015   | 188.94266    | 50.1657 |
| 2      | 11.068        | BB   | 0.3646      | 2145.96167   | 91.18897     | 49.8343 |

Totals : 4379.86182 280.13163

### Enantioenriched

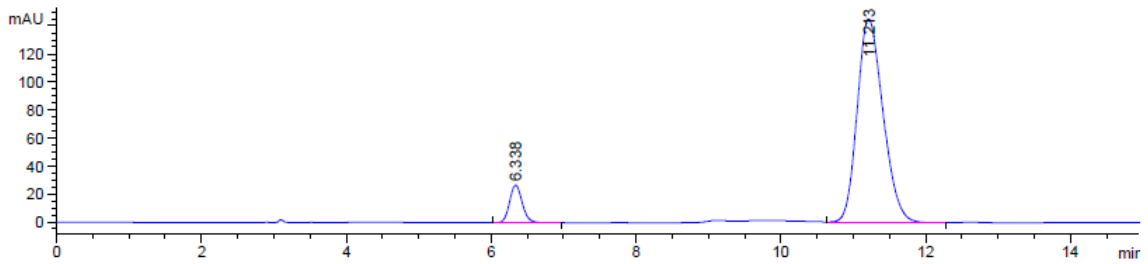

Signal 5: DAD1 E, Sig=240,16 Ref=360,100

| Peak # | RetTime [min] | Type | Width [min] | Area [mAU*s] | Height [mAU] | Area %  |
|--------|---------------|------|-------------|--------------|--------------|---------|
| 1      | 6.338         | BB   | 0.1854      | 324.71451    | 26.79047     | 8.1917  |
| 2      | 11.213        | VB   | 0.3875      | 3639.22949   | 145.66898    | 91.8083 |

Totals : 3963.94400 172.45945

#### 4.6 $^1\text{H-NMR}$ , $^{13}\text{C-NMR}$ , NOE and HPLC traces of imidazoline 5f

##### $^1\text{H-NMR}$

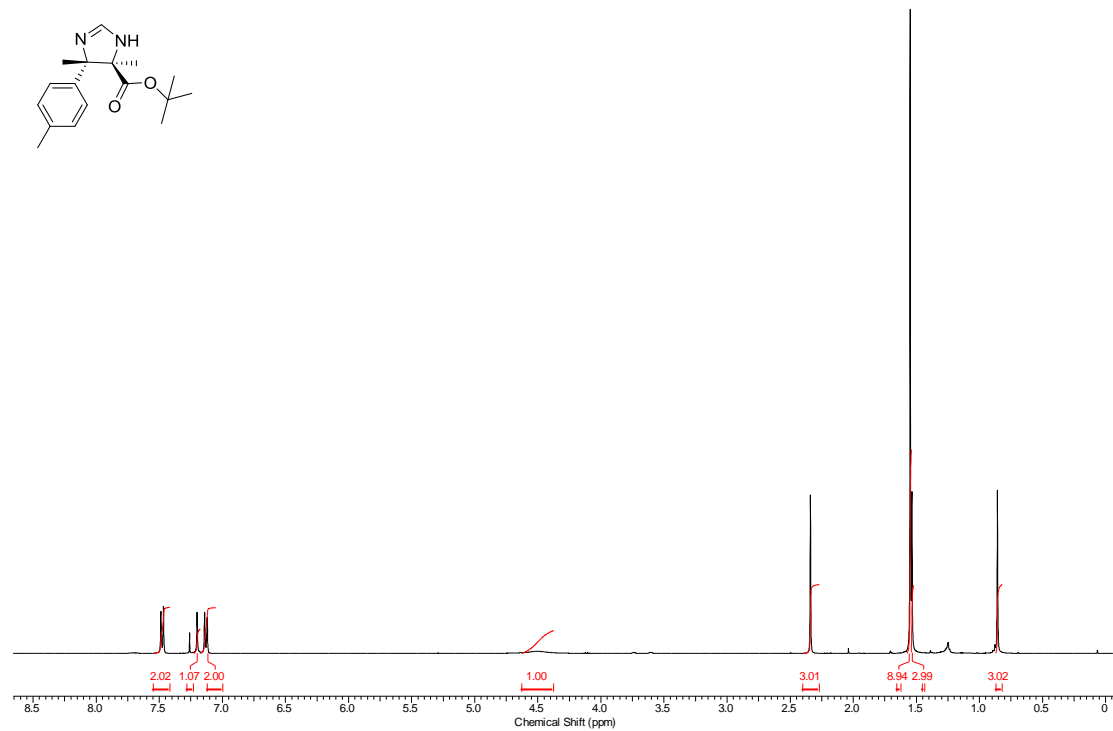

##### $^{13}\text{C-NMR}$

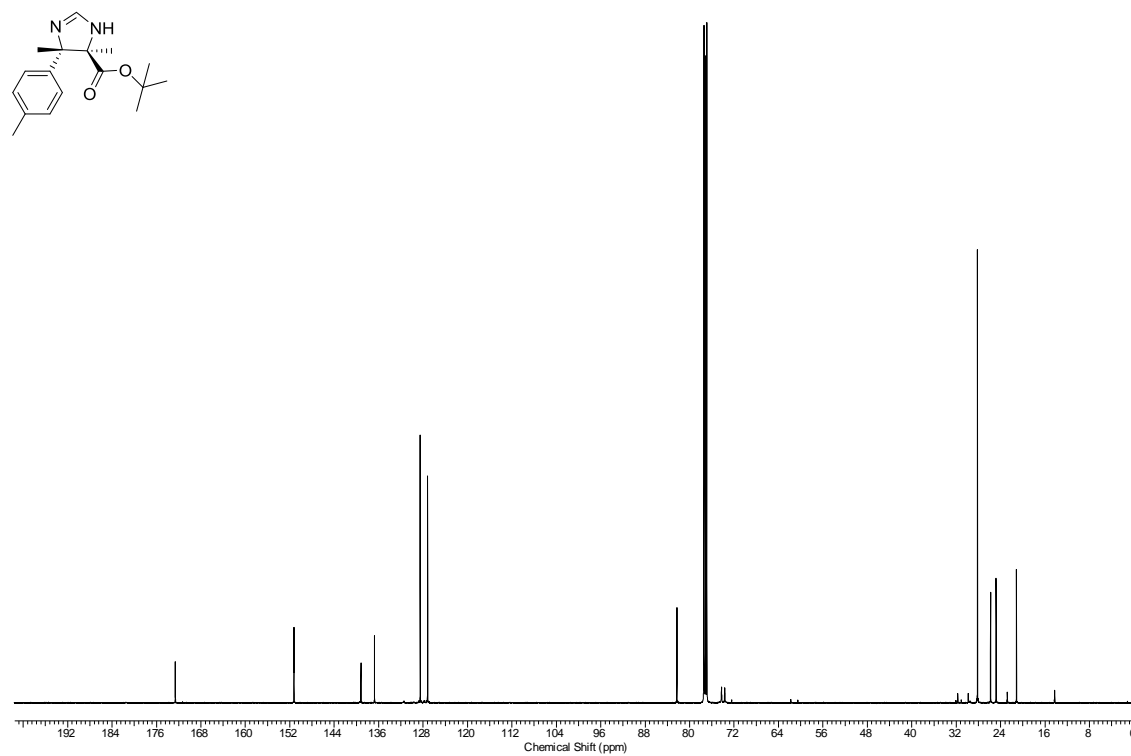

**nOe in the  $^1\text{H-NMR}$  of imidazoline 5f**  
CDCl<sub>3</sub>, 400 MHz, Tmix 800 ms

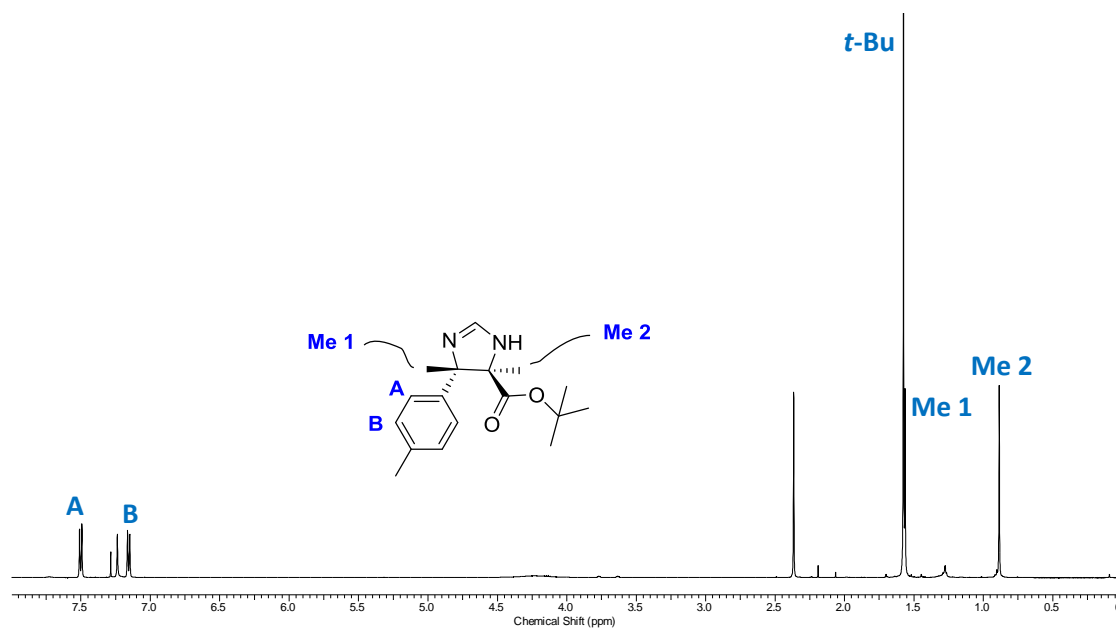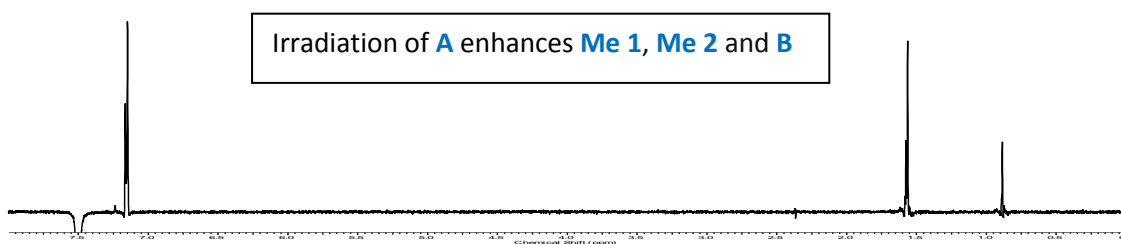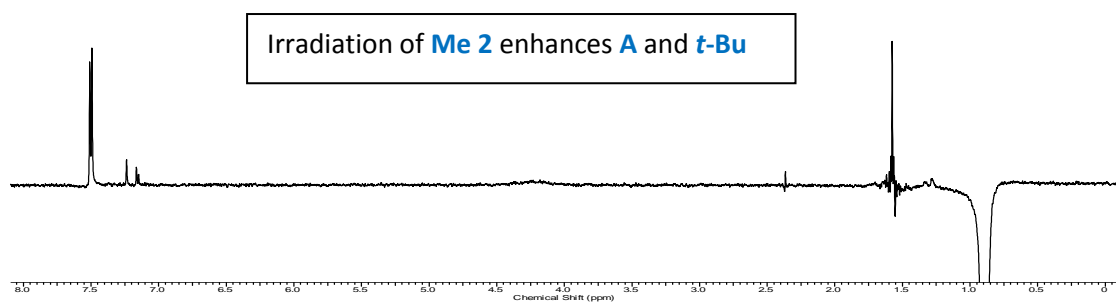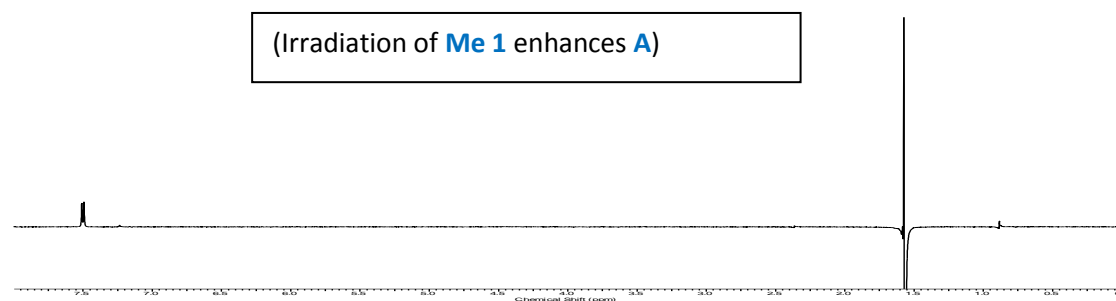

## HPLC traces of imidazoline 5f

### Racemic

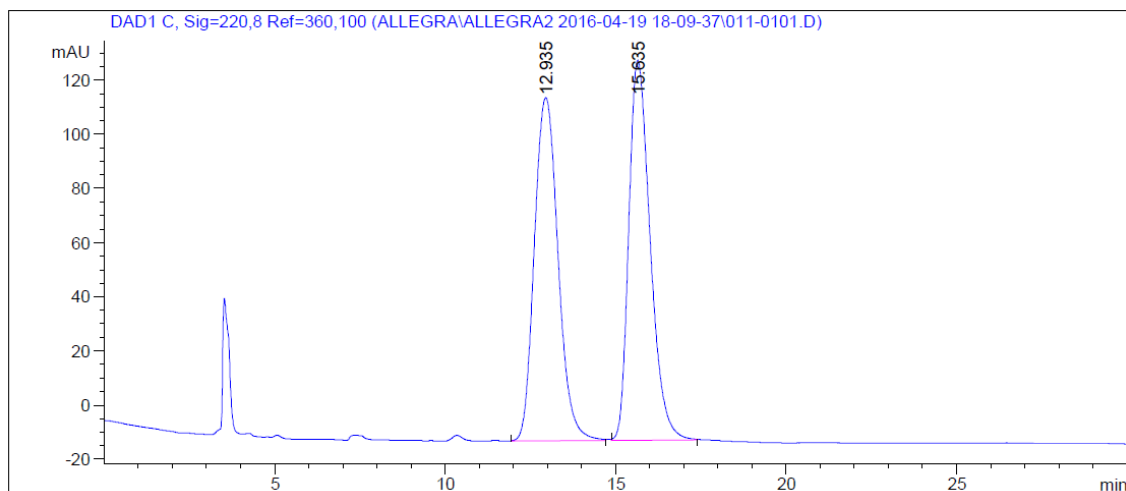

| Peak # | RetTime [min] | Type | Width [min] | Area [mAU*s] | Height [mAU] | Area %  |
|--------|---------------|------|-------------|--------------|--------------|---------|
| 1      | 12.935        | BB   | 0.7647      | 6132.23438   | 126.69684    | 50.0277 |
| 2      | 15.635        | BB   | 0.6732      | 6125.45068   | 140.33130    | 49.9723 |

### Enantioenriched

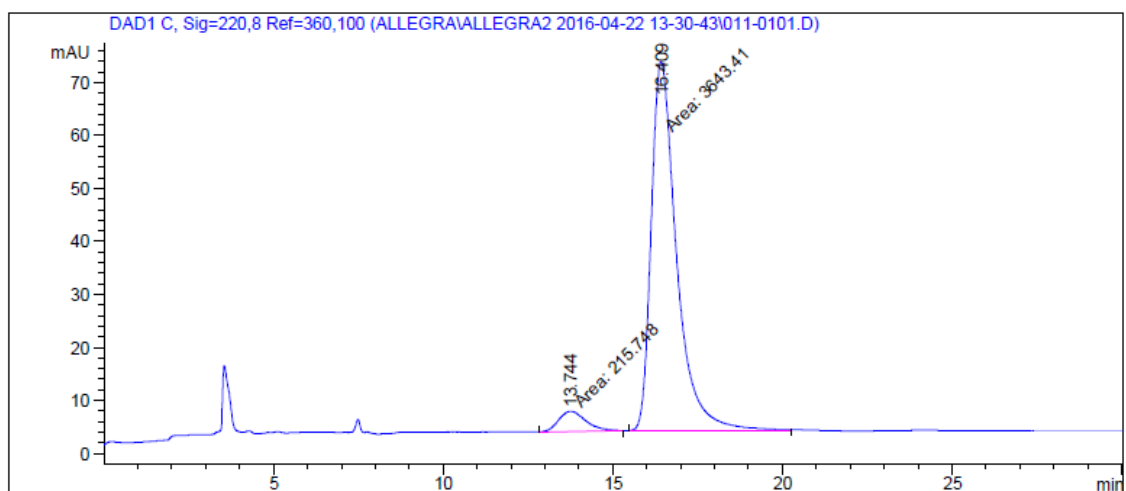

| Peak # | RetTime [min] | Type | Width [min] | Area [mAU*s] | Height [mAU] | Area %  |
|--------|---------------|------|-------------|--------------|--------------|---------|
| 1      | 13.744        | MM   | 0.9428      | 215.74811    | 3.81394      | 5.5906  |
| 2      | 16.409        | MM   | 0.8710      | 3643.40576   | 69.71594     | 94.4094 |

#### 4.7 $^1\text{H-NMR}$ , $^{13}\text{C-NMR}$ and HPLC traces of imidazoline 5g

##### $^1\text{H-NMR}$

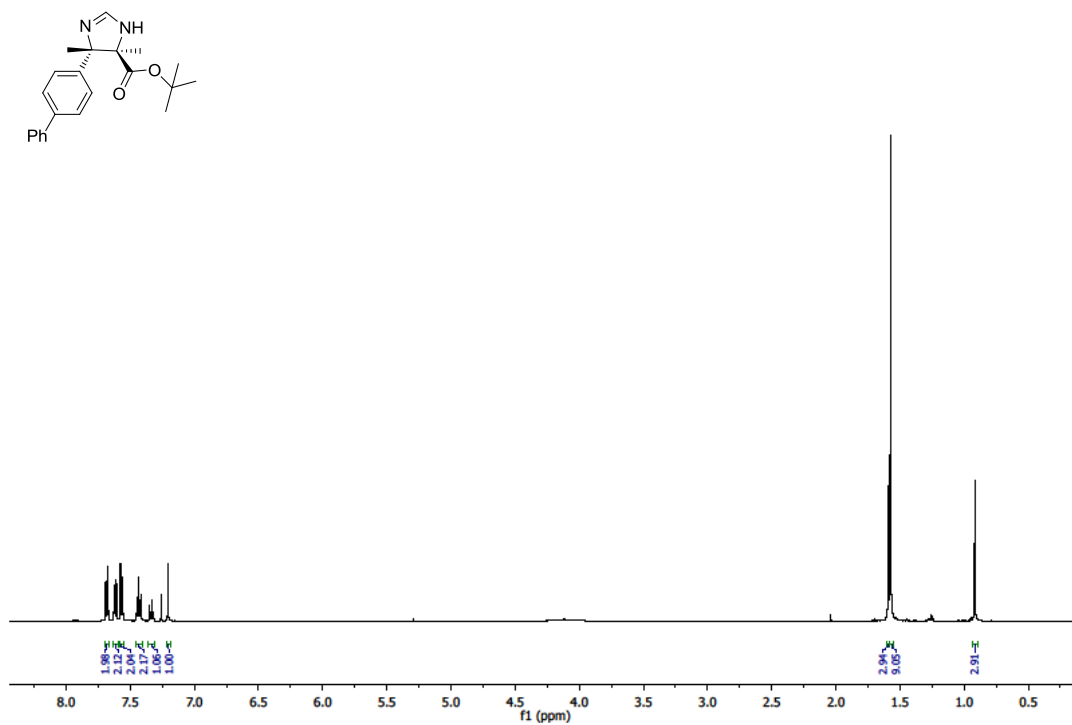

##### $^{13}\text{C-NMR}$

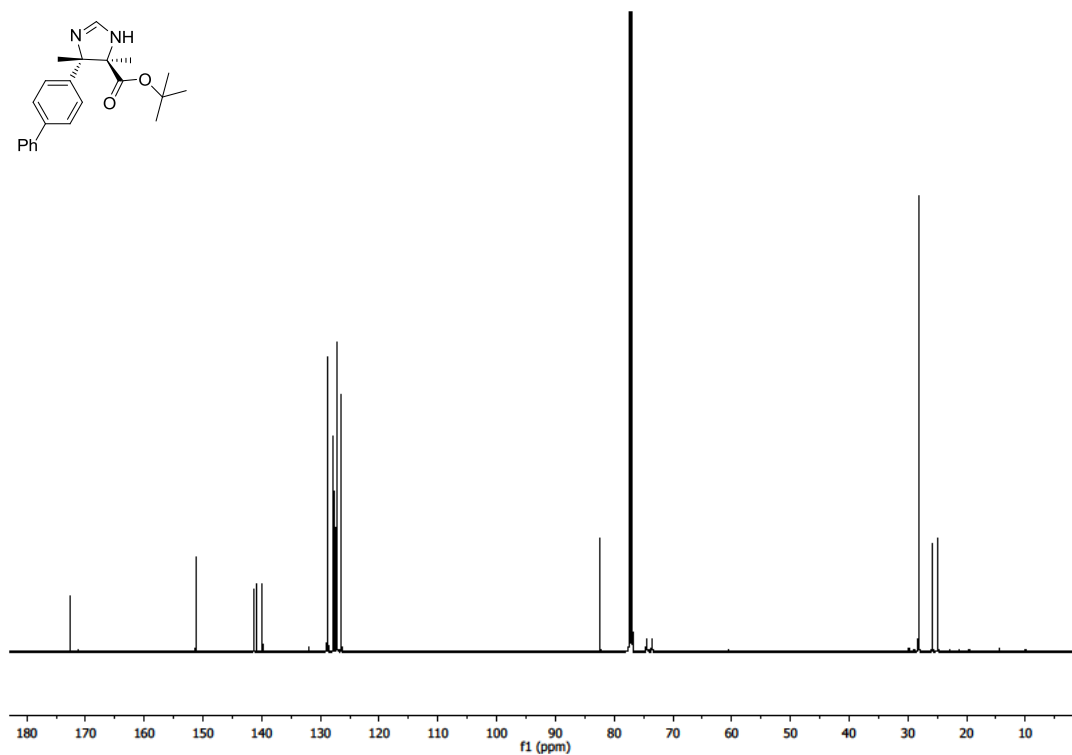

## HPLC traces of imidazoline 5g

### Racemic

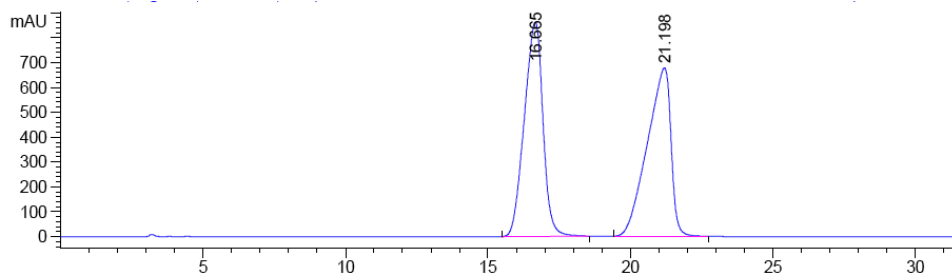

| Peak # | RetTime [min] | Type | Width [min] | Area [mAU*s] | Height [mAU] | Area %  |
|--------|---------------|------|-------------|--------------|--------------|---------|
| 1      | 16.665        | BB   | 0.7179      | 3.92650e4    | 861.20380    | 50.0310 |
| 2      | 21.198        | BB   | 0.8553      | 3.92164e4    | 677.56262    | 49.9690 |

### Enantioenriched

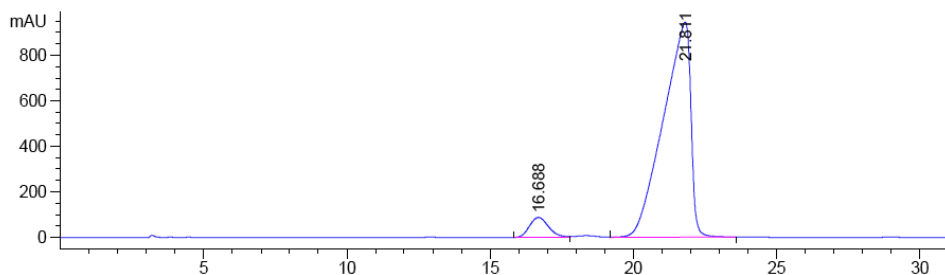

| Peak # | RetTime [min] | Type | Width [min] | Area [mAU*s] | Height [mAU] | Area %  |
|--------|---------------|------|-------------|--------------|--------------|---------|
| 1      | 16.688        | BV   | 0.7172      | 4027.33057   | 87.13321     | 6.0059  |
| 2      | 21.811        | VB   | 0.9568      | 6.30288e4    | 944.23627    | 93.9941 |



## 4.8 $^1\text{H-NMR}$ , $^{13}\text{C-NMR}$ and HPLC traces of imidazoline 5h

### $^1\text{H-NMR}$

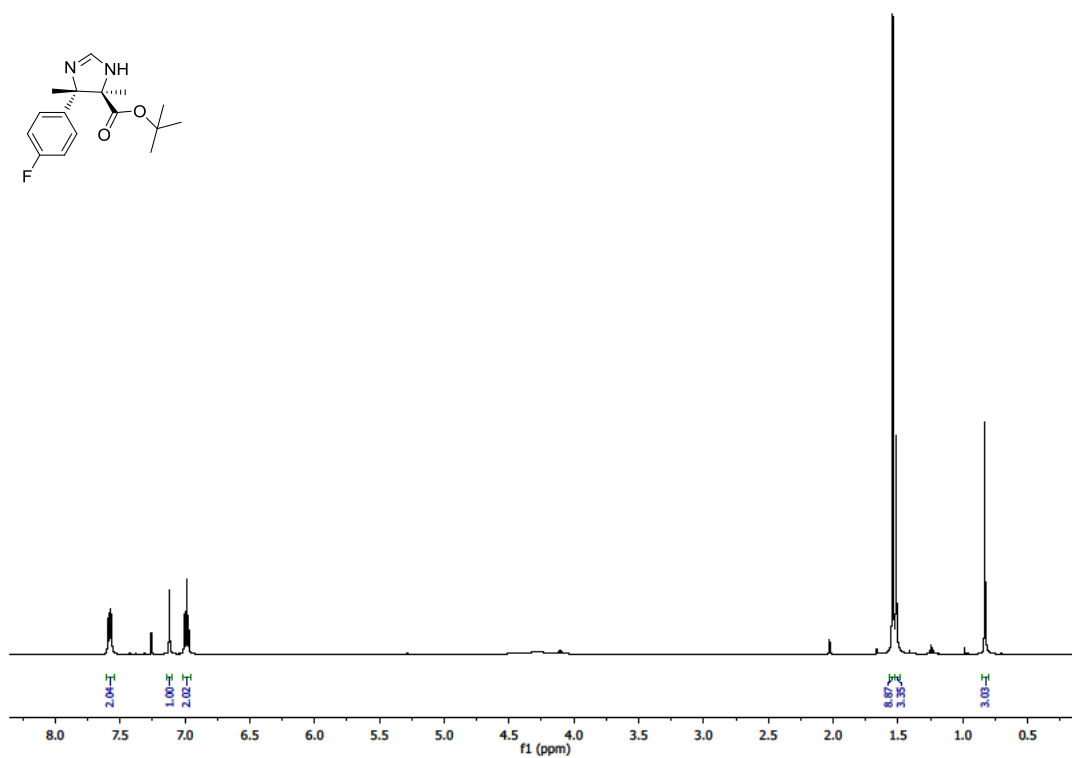

### $^{13}\text{C-NMR}$

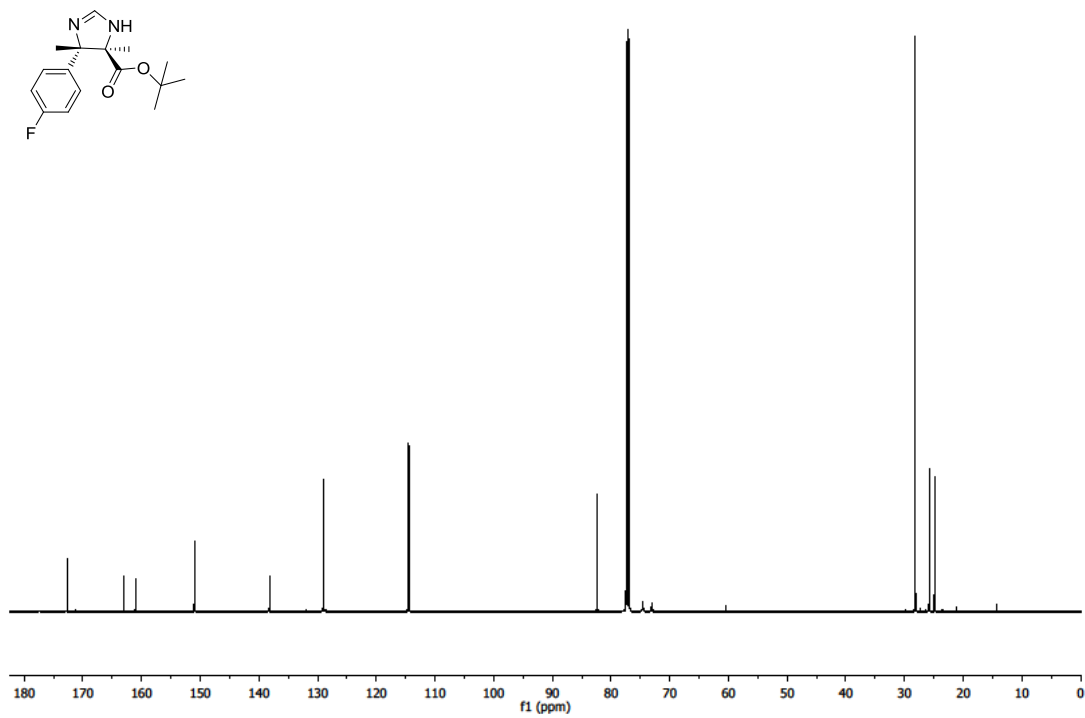

## HPLC traces of imidazoline 5h

### Racemic

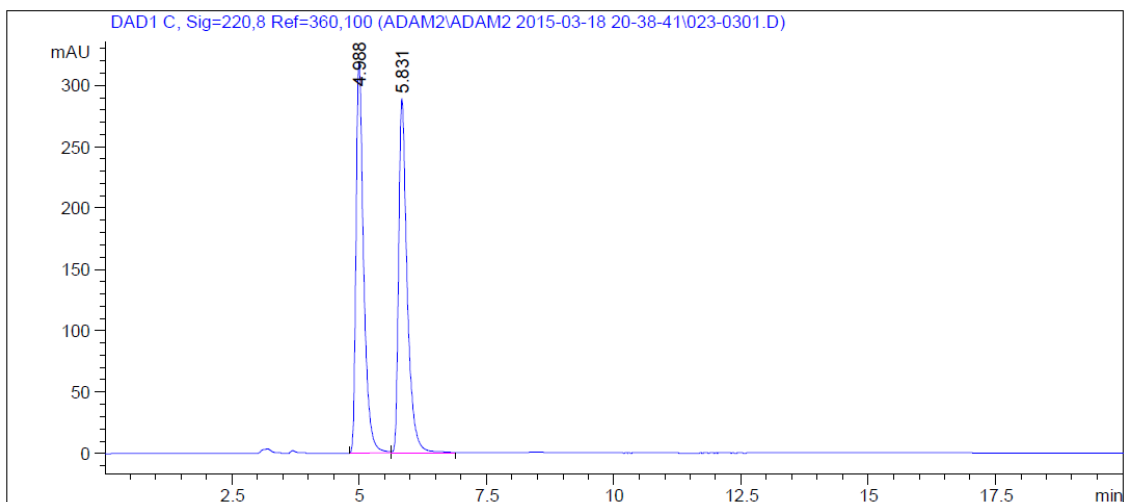

| Peak # | RetTime [min] | Type | Width [min] | Area [mAU*s] | Height [mAU] | Area %  |
|--------|---------------|------|-------------|--------------|--------------|---------|
| 1      | 4.988         | BV   | 0.1577      | 3336.00659   | 319.67346    | 49.8075 |
| 2      | 5.831         | VB   | 0.1736      | 3361.79028   | 289.13434    | 50.1925 |

### Enantioenriched

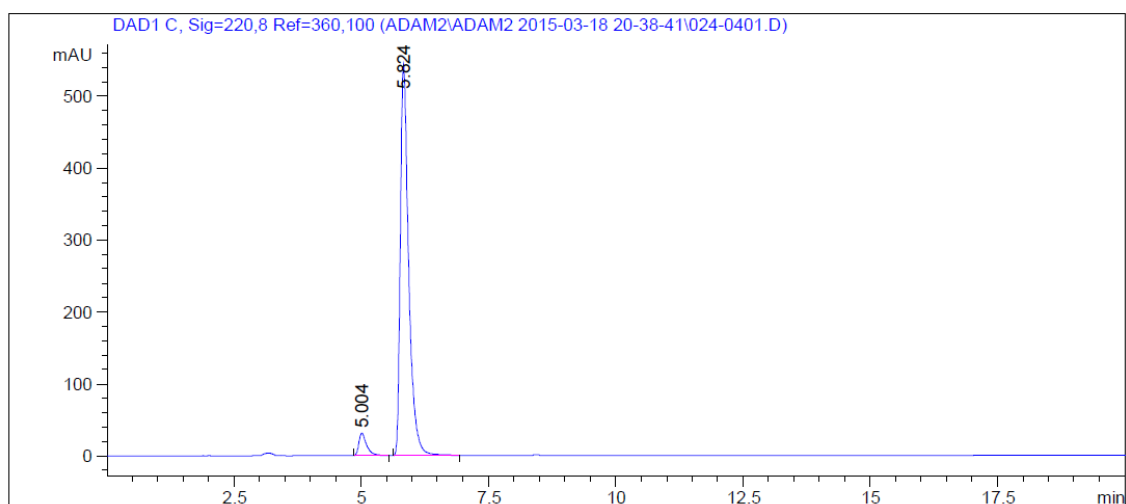

| Peak # | RetTime [min] | Type | Width [min] | Area [mAU*s] | Height [mAU] | Area %  |
|--------|---------------|------|-------------|--------------|--------------|---------|
| 1      | 5.004         | BB   | 0.1581      | 331.86877    | 31.18900     | 5.0889  |
| 2      | 5.824         | BB   | 0.1705      | 6189.50488   | 544.78314    | 94.9111 |

## 4.9 $^1\text{H-NMR}$ , $^{13}\text{C-NMR}$ and HPLC traces of imidazoline 5i

### $^1\text{H-NMR}$

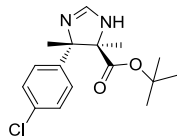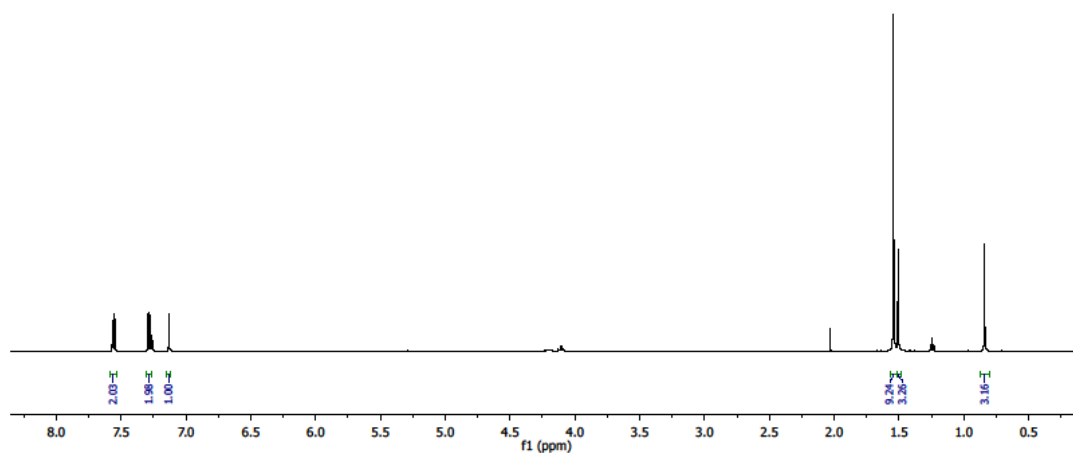

### $^{13}\text{C-NMR}$

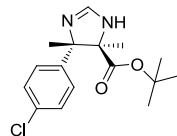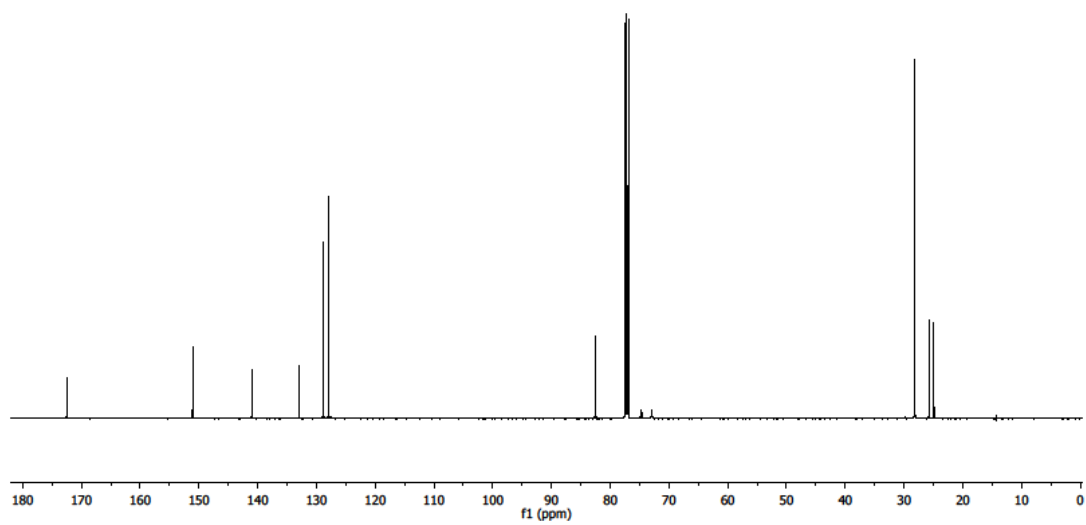

## HPLC traces of imidazoline 5i

### Racemic

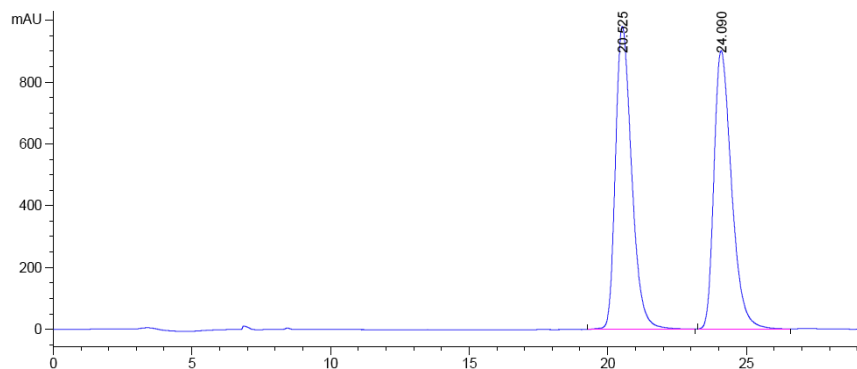

| Peak # | RetTime [min] | Type | Width [min] | Area [mAU*s] | Height [mAU] | Area %  |
|--------|---------------|------|-------------|--------------|--------------|---------|
| 1      | 20.525        | BB   | 0.6288      | 4.00605e4    | 980.26593    | 50.0240 |
| 2      | 24.090        | BB   | 0.6821      | 4.00220e4    | 901.15967    | 49.9760 |

### Enantioenriched

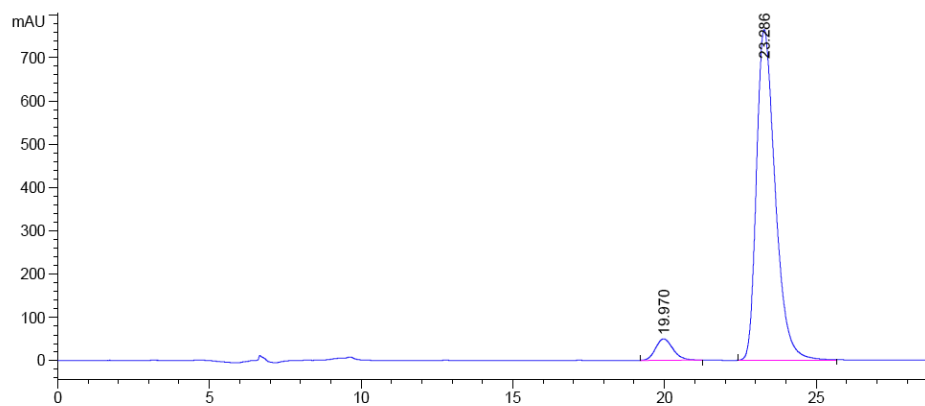

| Peak # | RetTime [min] | Type | Width [min] | Area [mAU*s] | Height [mAU] | Area %  |
|--------|---------------|------|-------------|--------------|--------------|---------|
| 1      | 19.970        | BB   | 0.6259      | 1989.75378   | 49.40577     | 5.7243  |
| 2      | 23.286        | BB   | 0.6606      | 3.27701e4    | 763.68127    | 94.2757 |

#### 4.10 $^1\text{H-NMR}$ , $^{13}\text{C-NMR}$ and HPLC traces of imidazoline 5j

##### $^1\text{H-NMR}$

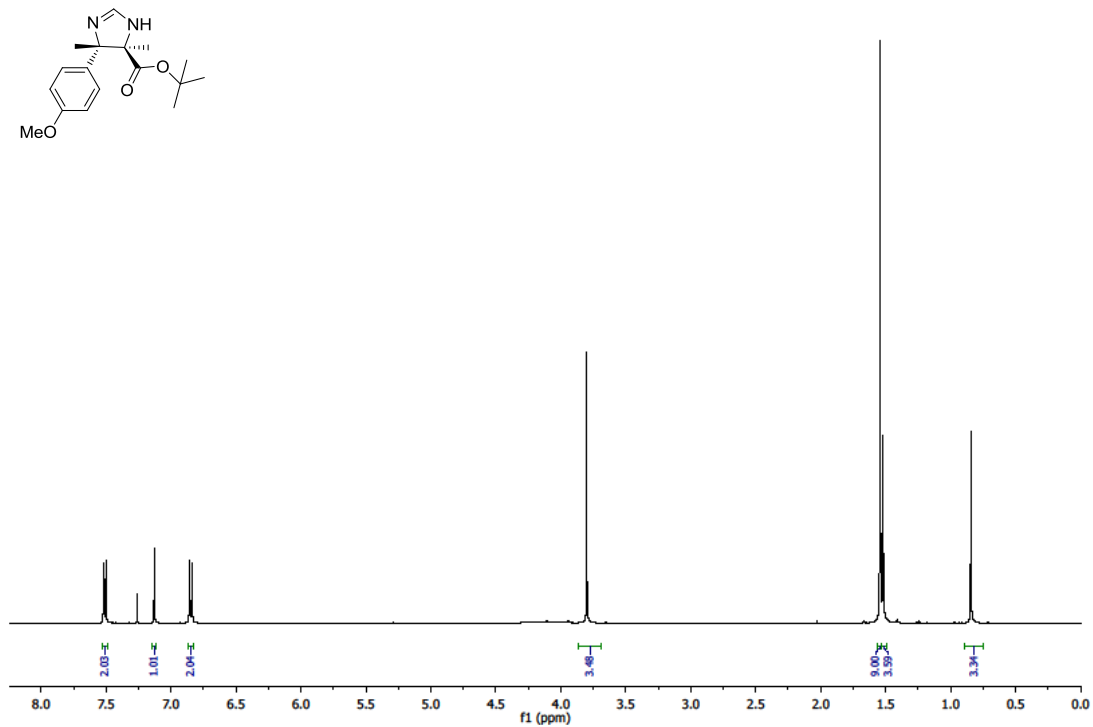

##### $^{13}\text{C-NMR}$

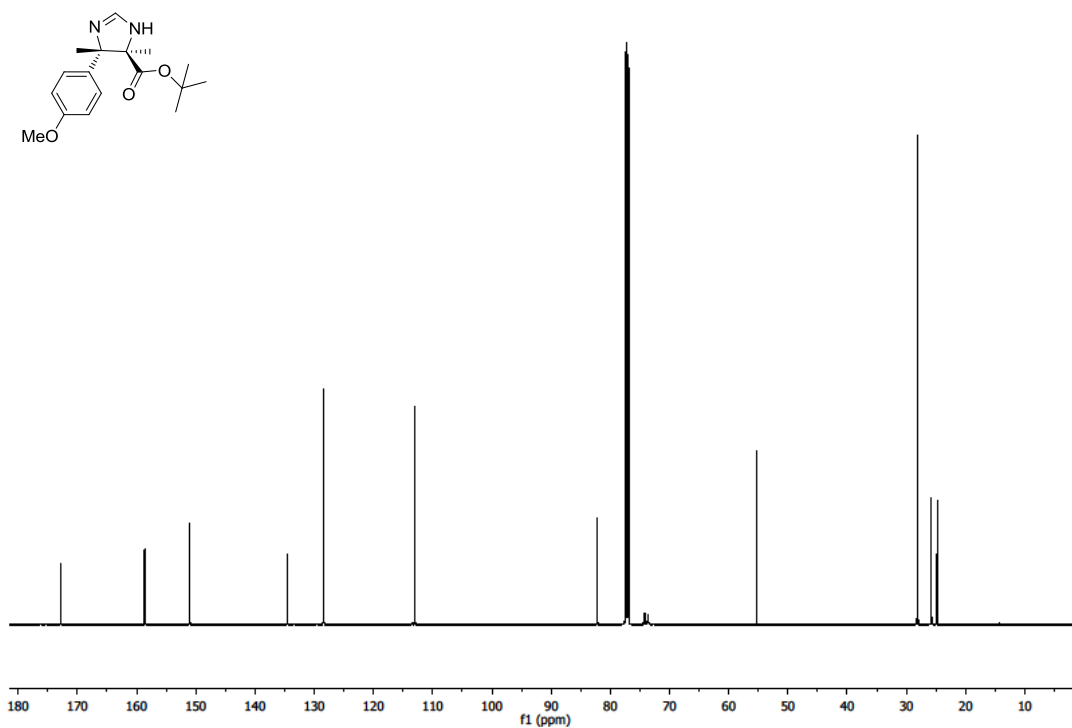

## HPLC traces of imidazoline 5j

### Racemic

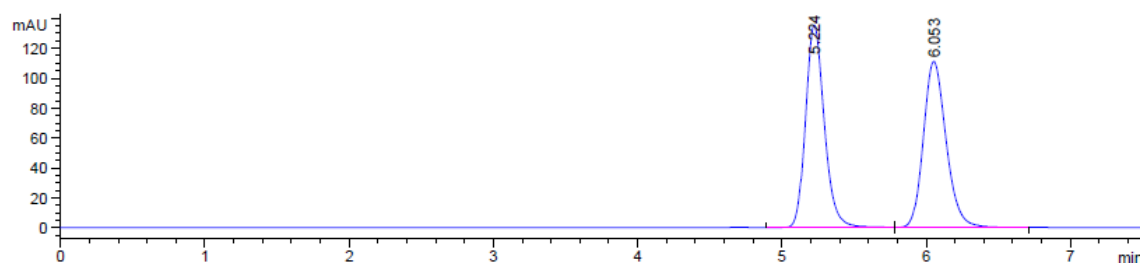

| Peak # | RetTime [min] | Type | Width [min] | Area [mAU*s] | Height [mAU] | Area %  |
|--------|---------------|------|-------------|--------------|--------------|---------|
| 1      | 5.224         | VV   | 0.1384      | 1233.69507   | 135.21347    | 50.1078 |
| 2      | 6.053         | VB   | 0.1692      | 1228.38745   | 110.94753    | 49.8922 |

### Enantioenriched

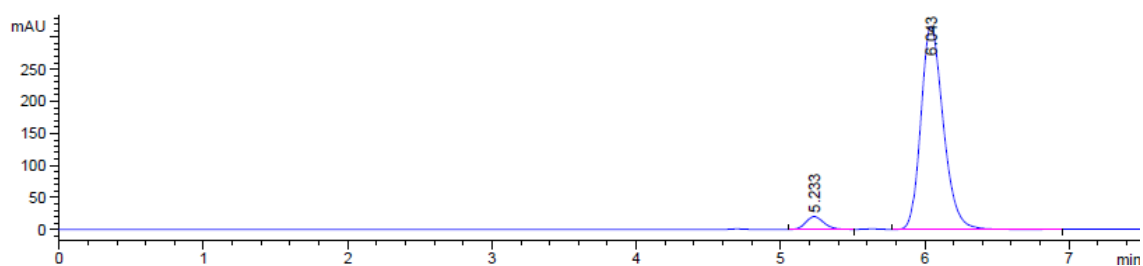

| Peak # | RetTime [min] | Type | Width [min] | Area [mAU*s] | Height [mAU] | Area %  |
|--------|---------------|------|-------------|--------------|--------------|---------|
| 1      | 5.233         | BV   | 0.1423      | 184.96959    | 20.29319     | 5.0898  |
| 2      | 6.043         | VB   | 0.1673      | 3449.18726   | 316.20911    | 94.9102 |

## 4.11 $^1\text{H-NMR}$ , $^{13}\text{C-NMR}$ and HPLC traces of imidazoline 5k

### $^1\text{H-NMR}$

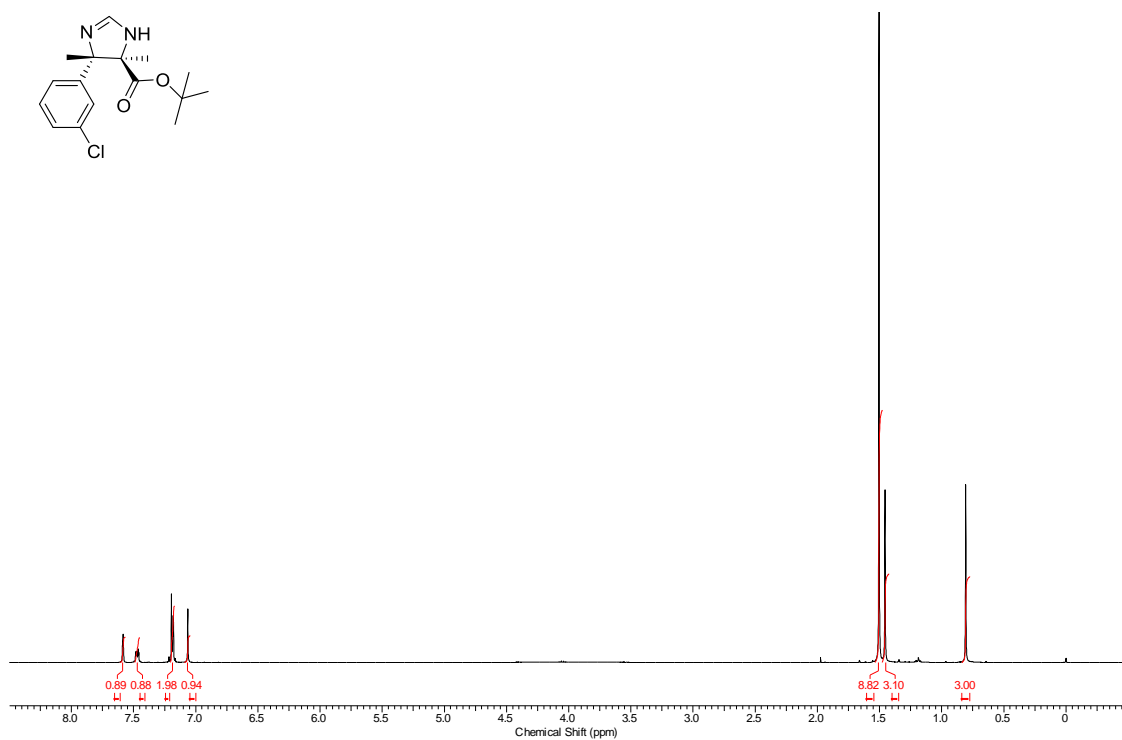

### $^{13}\text{C-NMR}$

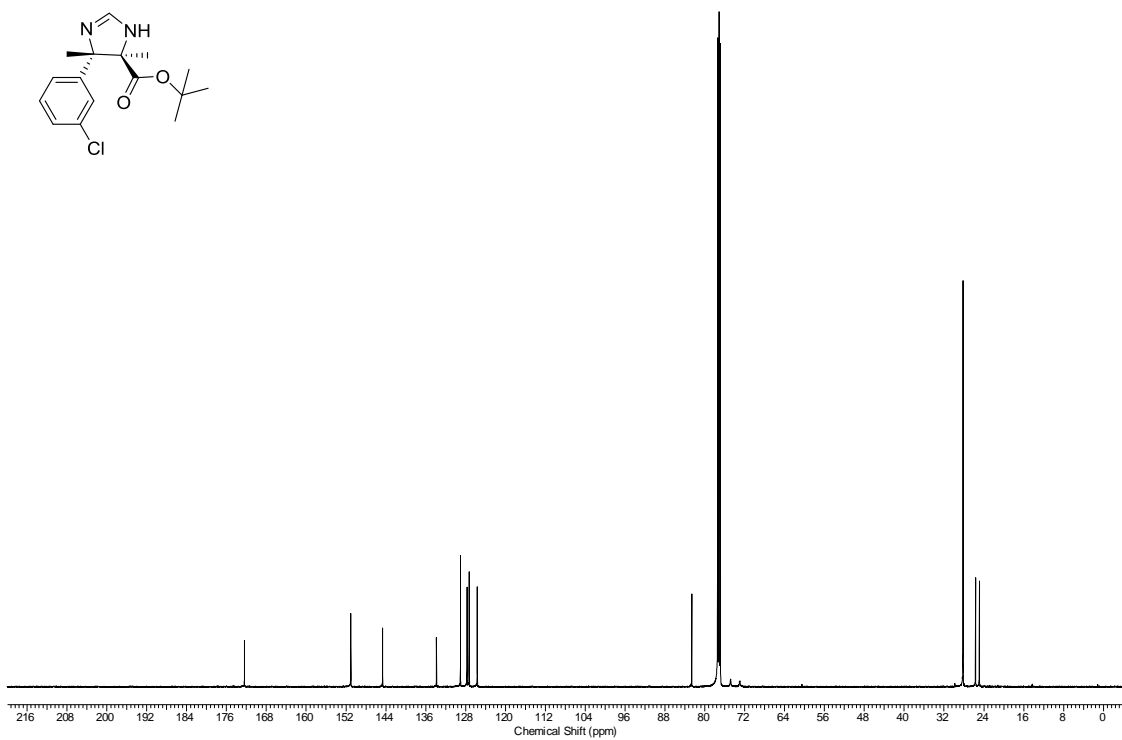

## HPLC traces of imidazoline 5k

### Racemic

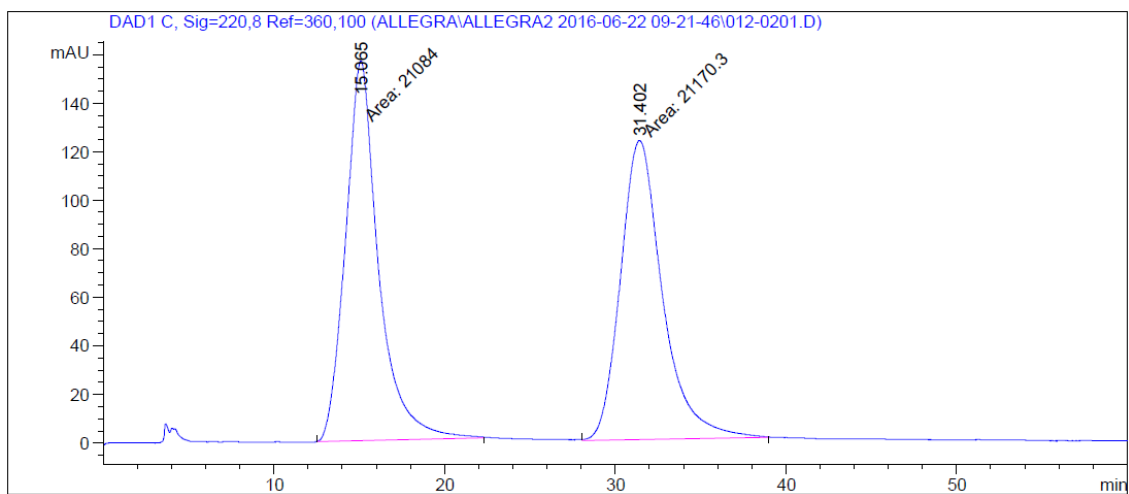

| Peak # | RetTime [min] | Type | Width [min] | Area [mAU*s] | Height [mAU] | Area %  |
|--------|---------------|------|-------------|--------------|--------------|---------|
| 1      | 15.065        | MM   | 2.2439      | 2.10840e4    | 156.60271    | 49.8978 |
| 2      | 31.402        | MM   | 2.8613      | 2.11703e4    | 123.31413    | 50.1022 |

### Enantioenriched

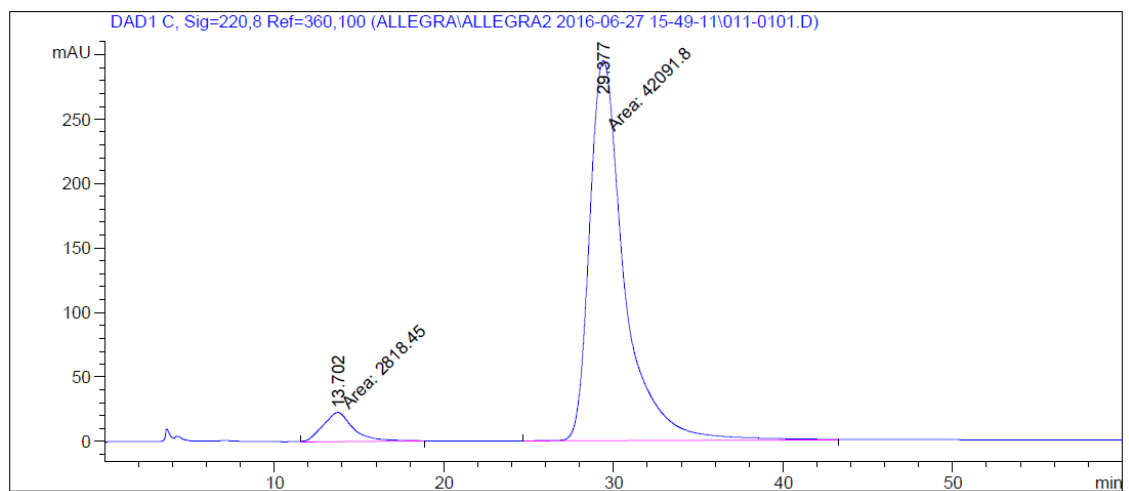

| Peak # | RetTime [min] | Type | Width [min] | Area [mAU*s] | Height [mAU] | Area %  |
|--------|---------------|------|-------------|--------------|--------------|---------|
| 1      | 13.702        | MM   | 2.0823      | 2818.44775   | 22.55852     | 6.2757  |
| 2      | 29.377        | MM   | 2.3783      | 4.20918e4    | 294.97662    | 93.7243 |



#### 4.12 $^1\text{H-NMR}$ , $^{13}\text{C-NMR}$ and HPLC traces of imidazoline 5l

##### $^1\text{H-NMR}$

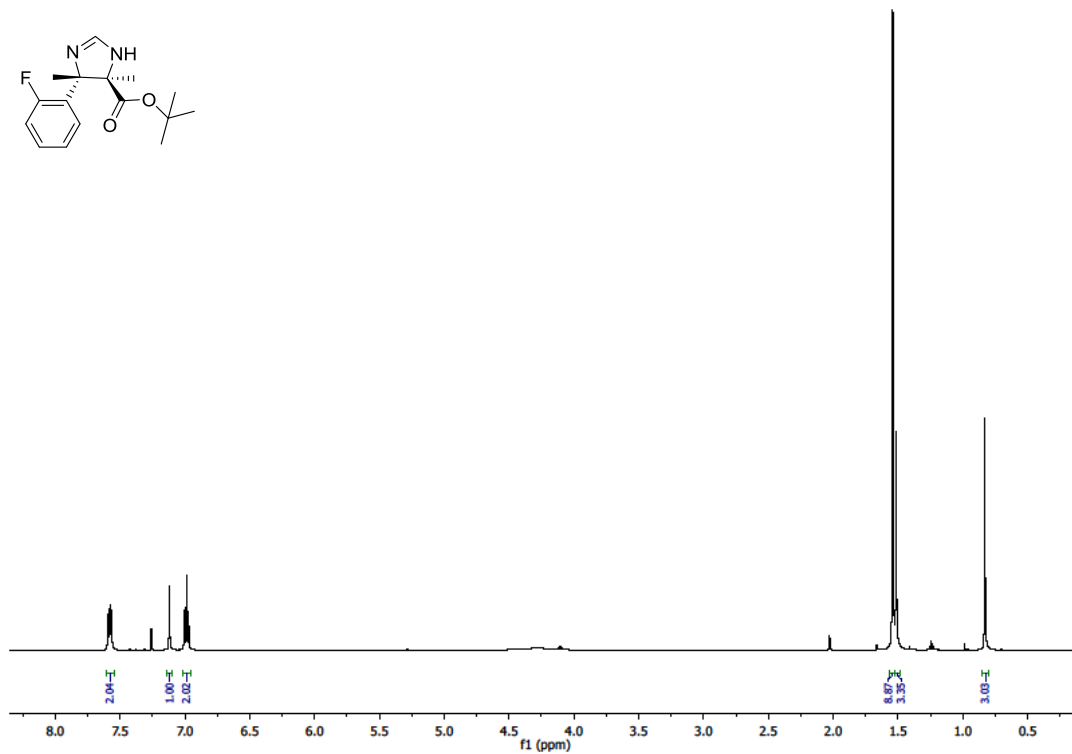

##### $^{13}\text{C-NMR}$

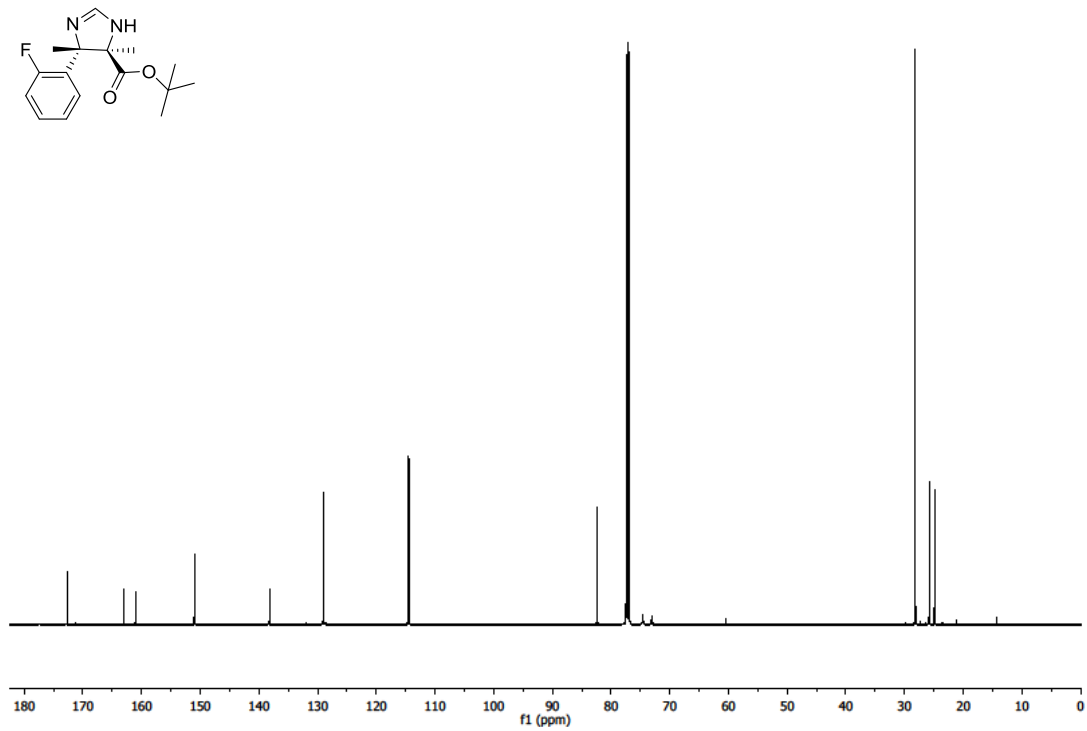

## HPLC traces of imidazoline 5l

### Racemic

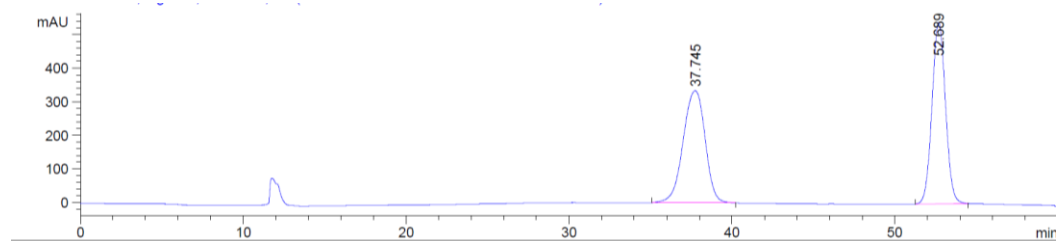

| Peak # | RetTime [min] | Type | Width [min] | Area [mAU*s] | Height [mAU] | Area %  |
|--------|---------------|------|-------------|--------------|--------------|---------|
| 1      | 37.745        | BB   | 1.1874      | 3.14818e4    | 334.68719    | 50.3278 |
| 2      | 52.689        | BB   | 0.7855      | 3.10717e4    | 540.66876    | 49.6722 |

### Enantioenriched

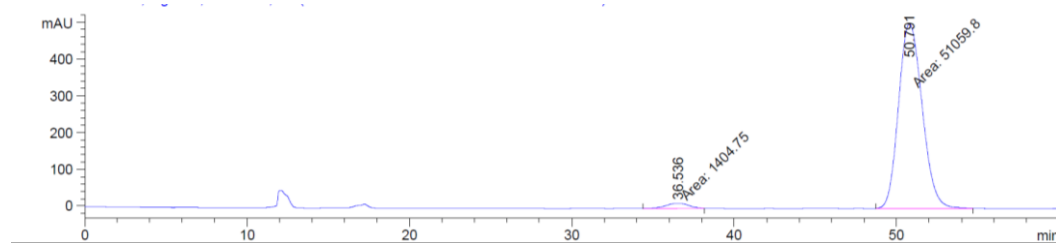

| Peak # | RetTime [min] | Type | Width [min] | Area [mAU*s] | Height [mAU] | Area %  |
|--------|---------------|------|-------------|--------------|--------------|---------|
| 1      | 36.536        | MM   | 1.6726      | 1404.74902   | 13.99772     | 2.6775  |
| 2      | 50.791        | MM   | 1.6899      | 5.10598e4    | 503.58163    | 97.3225 |

#### 4.13 $^1\text{H-NMR}$ , $^{13}\text{C-NMR}$ and HPLC traces of imidazoline 5m

##### $^1\text{H-NMR}$

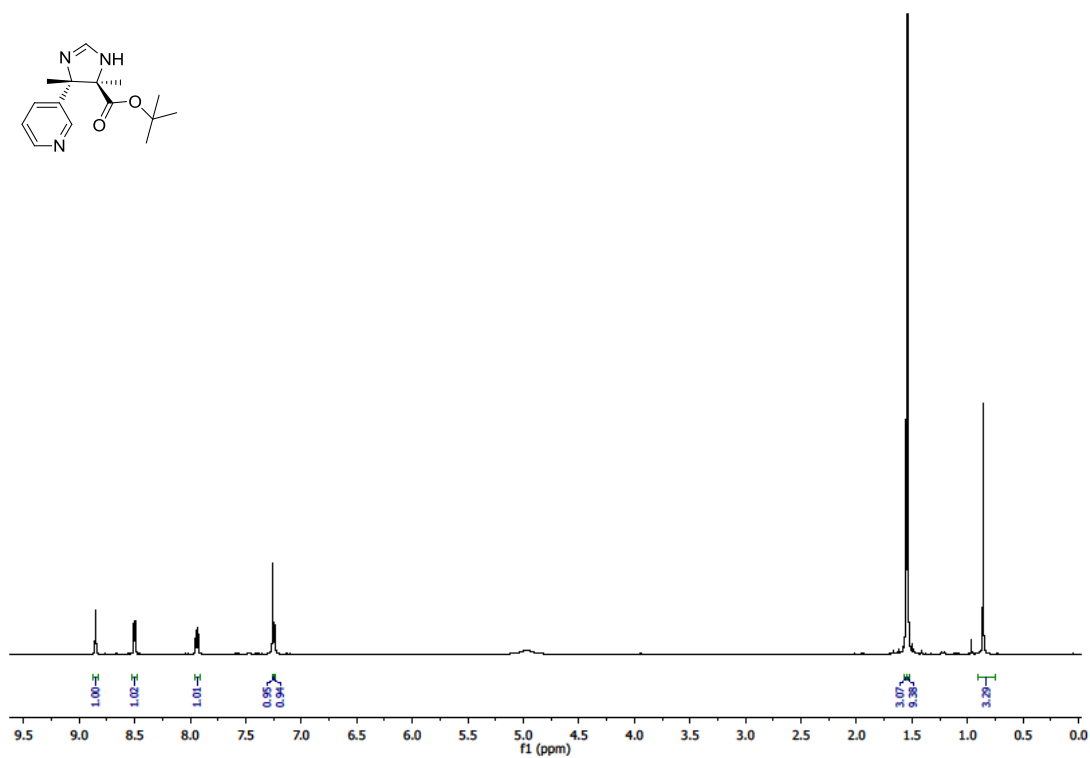

##### $^{13}\text{C-NMR}$

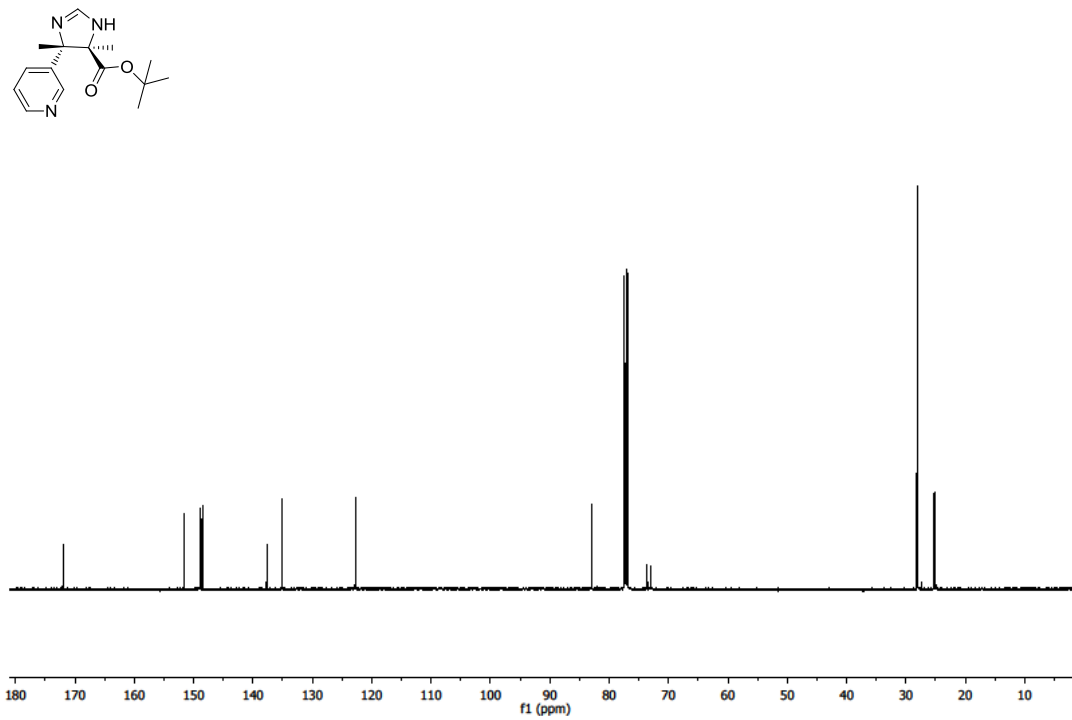

## HPLC traces of imidazoline 5m

### Racemic

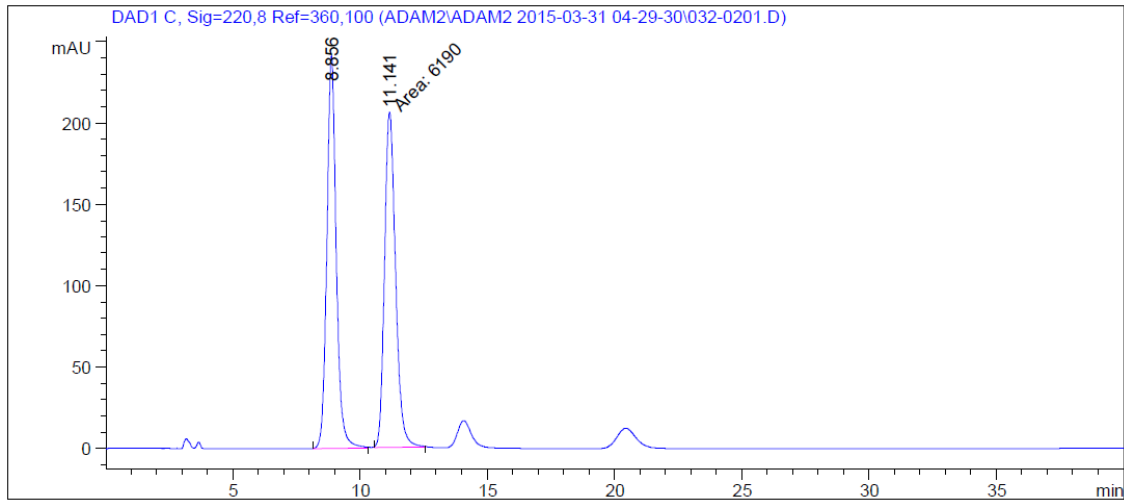

| Peak # | RetTime [min] | Type | Width [min] | Area [mAU*s] | Height [mAU] | Area %  |
|--------|---------------|------|-------------|--------------|--------------|---------|
| 1      | 8.856         | BB   | 0.3888      | 6212.50488   | 240.96596    | 50.0907 |
| 2      | 11.141        | MM   | 0.5011      | 6189.99805   | 205.88304    | 49.9093 |

### Enantioenriched

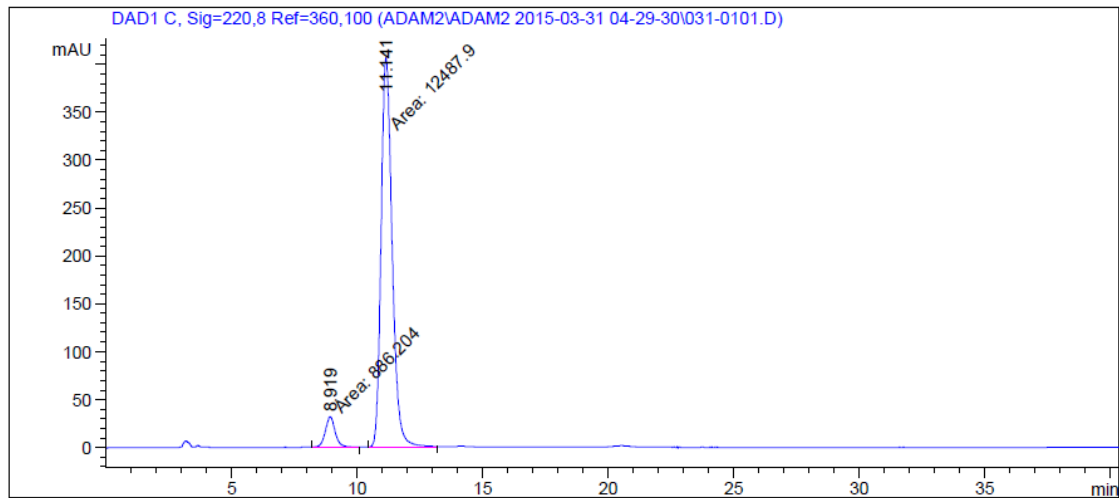

| Peak # | RetTime [min] | Type | Width [min] | Area [mAU*s] | Height [mAU] | Area %  |
|--------|---------------|------|-------------|--------------|--------------|---------|
| 1      | 8.919         | MM   | 0.4619      | 886.20422    | 31.97665     | 6.6263  |
| 2      | 11.141        | MM   | 0.5120      | 1.24879e4    | 406.51300    | 93.3737 |

#### 4.14 $^1\text{H-NMR}$ , $^{13}\text{C-NMR}$ and HPLC traces of imidazoline 5n

##### $^1\text{H-NMR}$

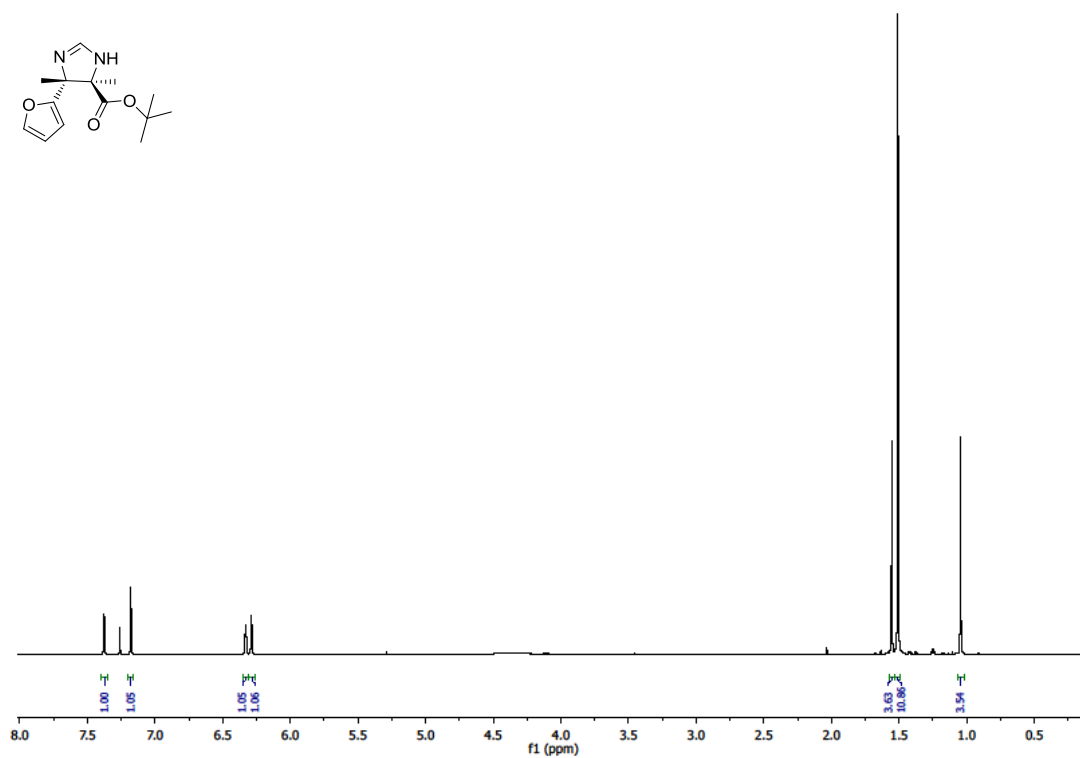

##### $^{13}\text{C-NMR}$

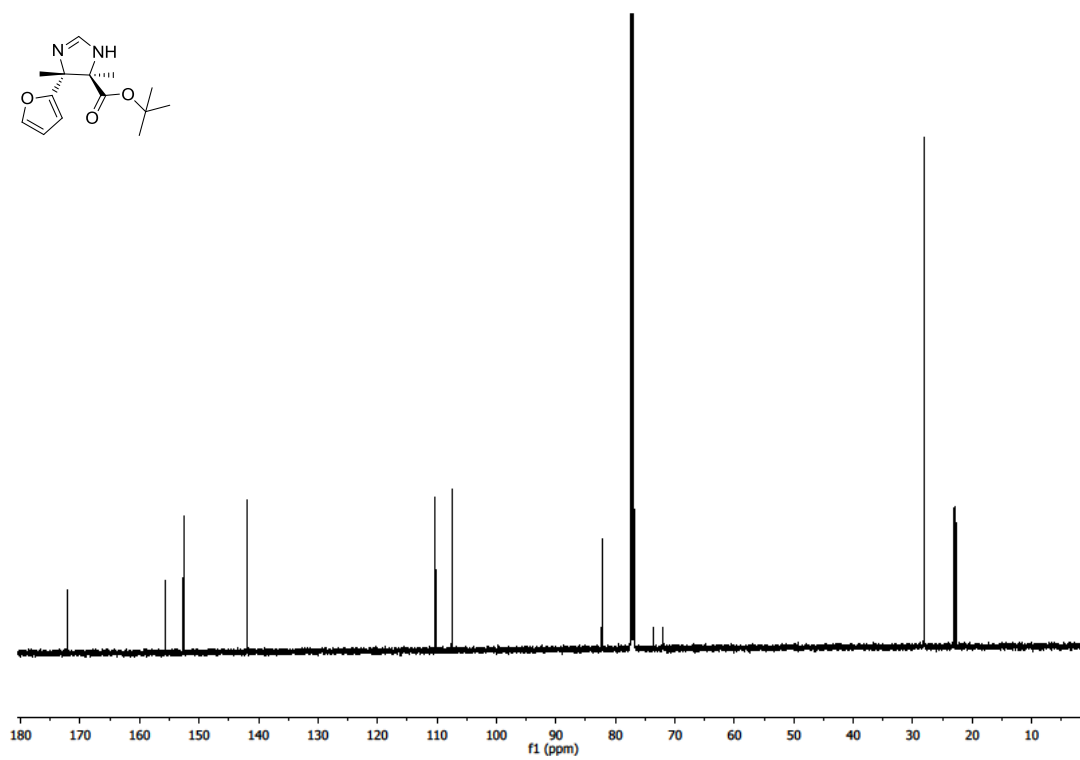

## HPLC traces of imidazoline 5n

### Racemic

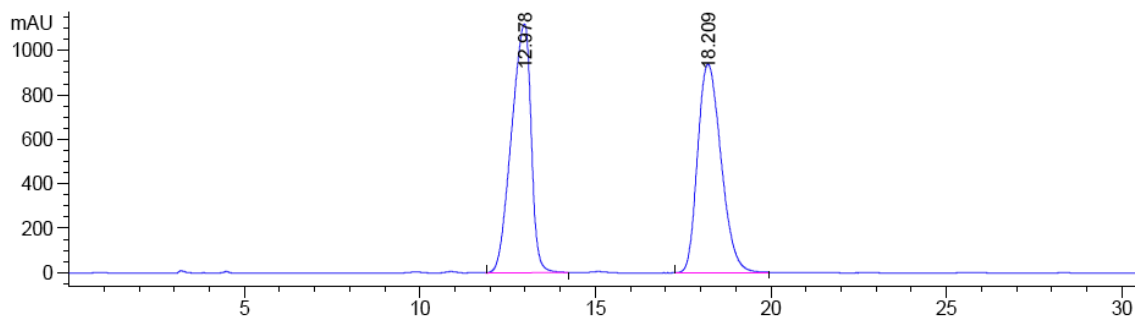

| Peak # | RetTime [min] | Type | Width [min] | Area [mAU*s] | Height [mAU] | Area %  |
|--------|---------------|------|-------------|--------------|--------------|---------|
| 1      | 12.978        | VB   | 0.6315      | 4.34602e4    | 1118.15540   | 49.9540 |
| 2      | 18.209        | BB   | 0.7276      | 4.35403e4    | 937.90662    | 50.0460 |

### Enantioenriched

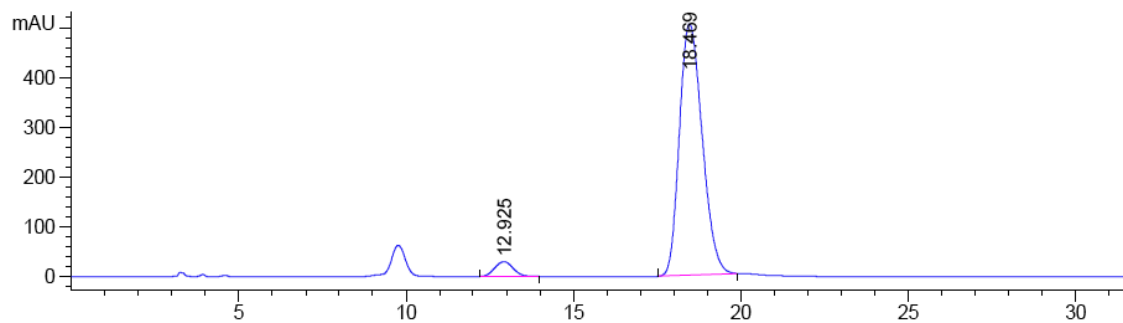

| Peak # | RetTime [min] | Type | Width [min] | Area [mAU*s] | Height [mAU] | Area %  |
|--------|---------------|------|-------------|--------------|--------------|---------|
| 1      | 12.925        | BB   | 0.6056      | 1808.98987   | 47.14923     | 4.5045  |
| 2      | 18.469        | BB   | 0.7474      | 3.83507e4    | 808.50659    | 95.4955 |

#### 4.15 $^1\text{H-NMR}$ , $^{13}\text{C-NMR}$ and HPLC traces of imidazoline 5o

##### $^1\text{H-NMR}$

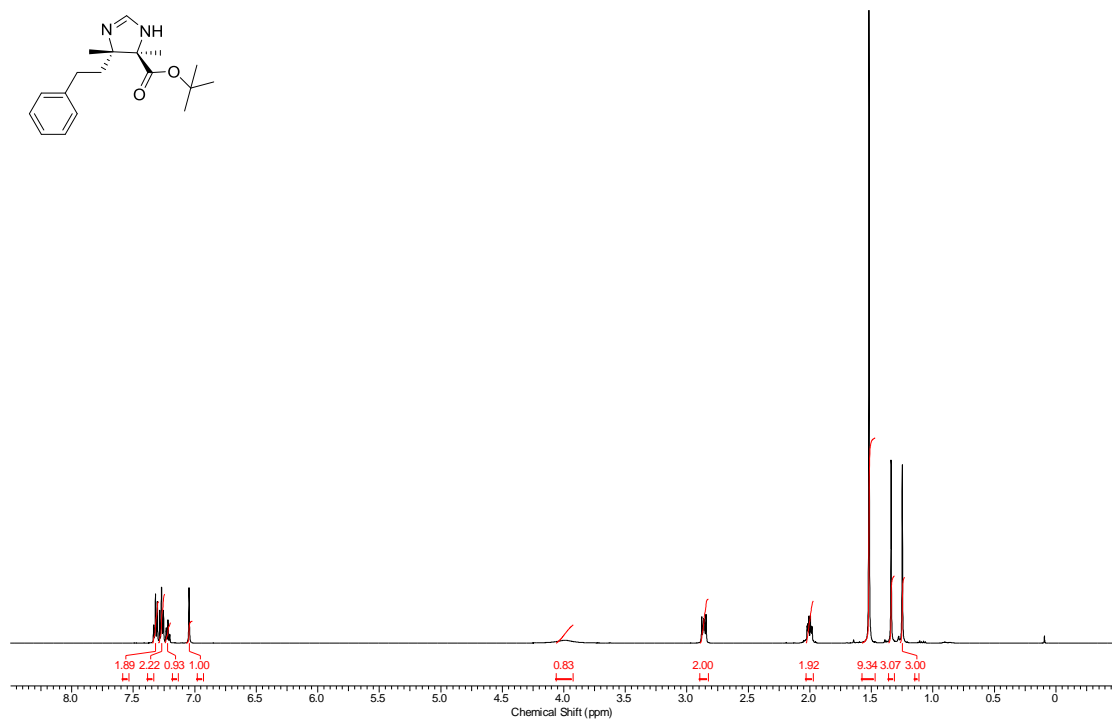

##### $^{13}\text{C-NMR}$

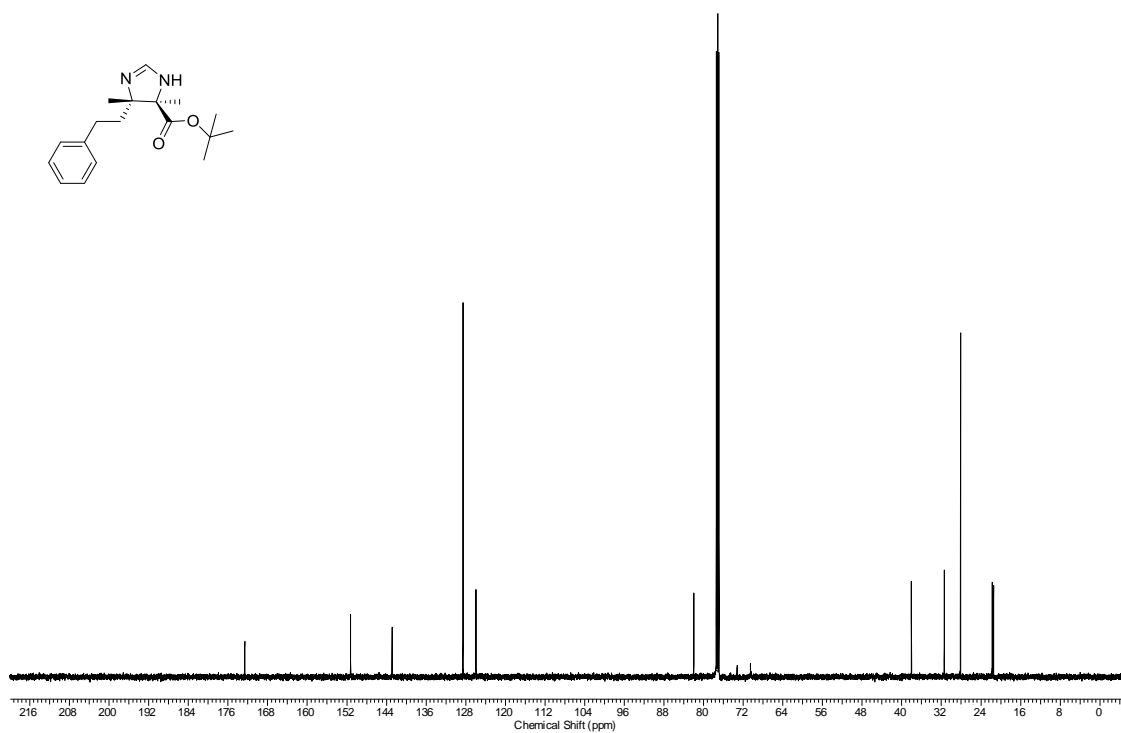

## HPLC traces of imidazoline 5o

### Racemic

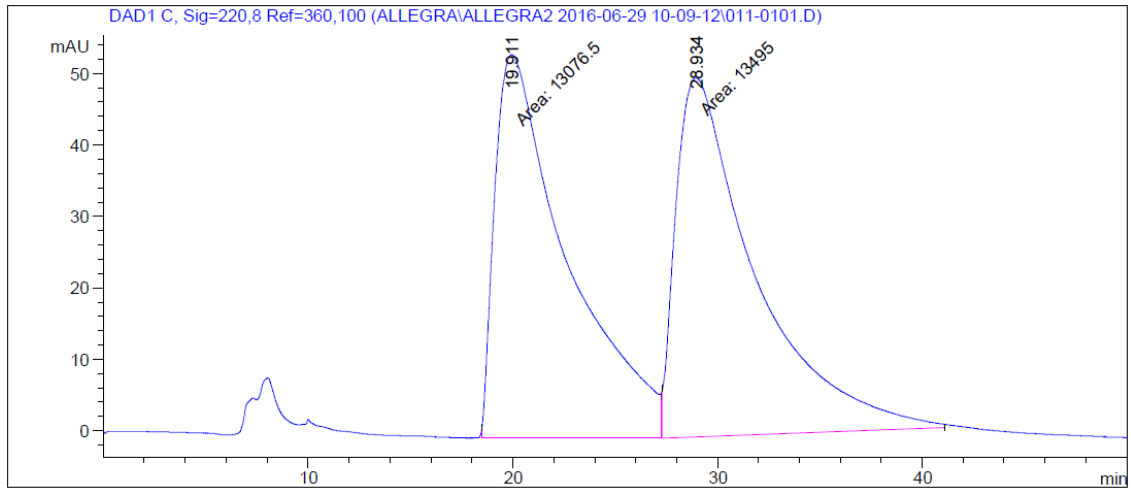

| Peak # | RetTime [min] | Type | Width [min] | Area [mAU*s] | Height [mAU] | Area %  |
|--------|---------------|------|-------------|--------------|--------------|---------|
| 1      | 19.911        | MM   | 4.0629      | 1.30765e4    | 53.64240     | 49.2124 |
| 2      | 28.934        | MM   | 4.4768      | 1.34950e4    | 50.24086     | 50.7876 |

### Enantioenriched

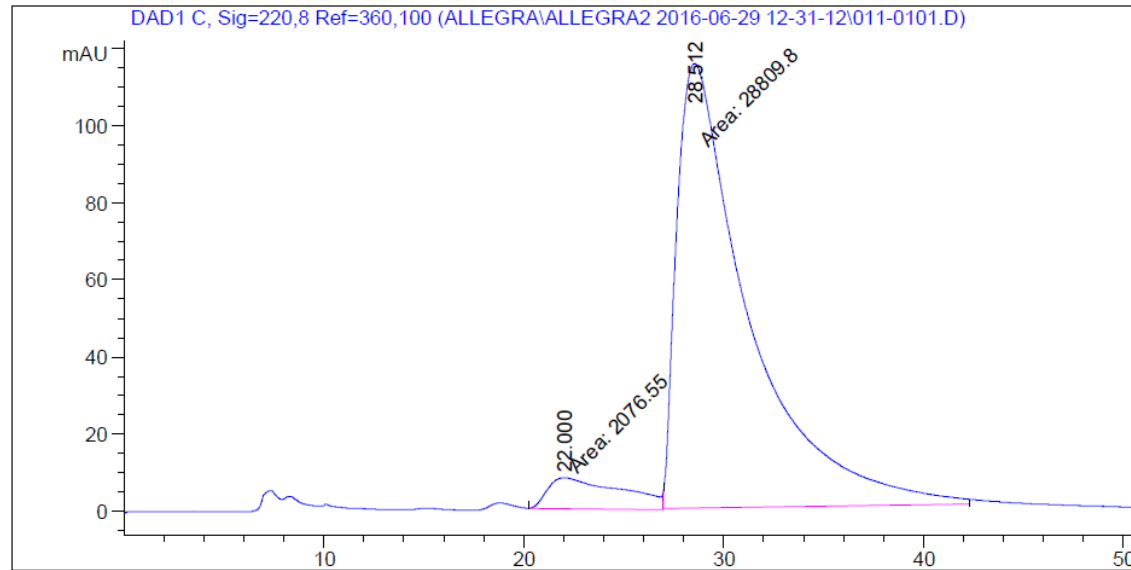

| Peak # | RetTime [min] | Type | Width [min] | Area [mAU*s] | Height [mAU] | Area %  |
|--------|---------------|------|-------------|--------------|--------------|---------|
| 1      | 22.000        | MM   | 4.3210      | 2076.55469   | 8.00961      | 6.7232  |
| 2      | 28.512        | MM   | 4.1655      | 2.88098e4    | 115.27138    | 93.2768 |



#### 4.16 $^1\text{H-NMR}$ , $^{13}\text{C-NMR}$ and HPLC traces of imidazoline 5p

##### $^1\text{H-NMR}$

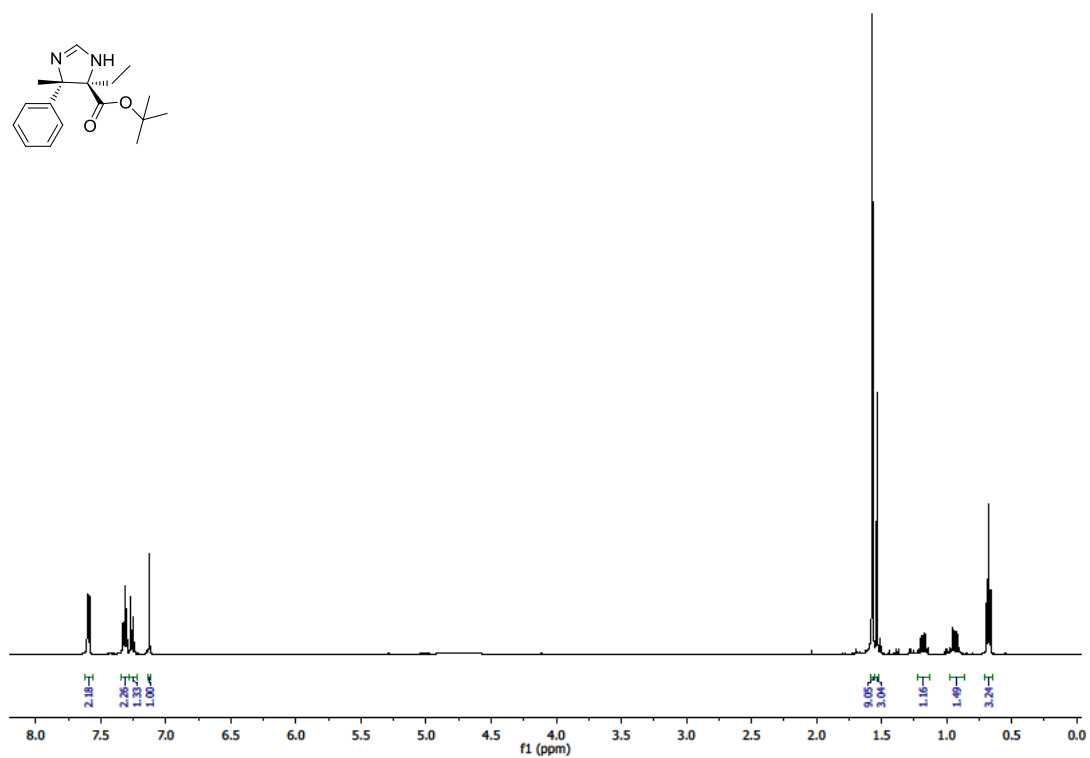

##### $^{13}\text{C-NMR}$

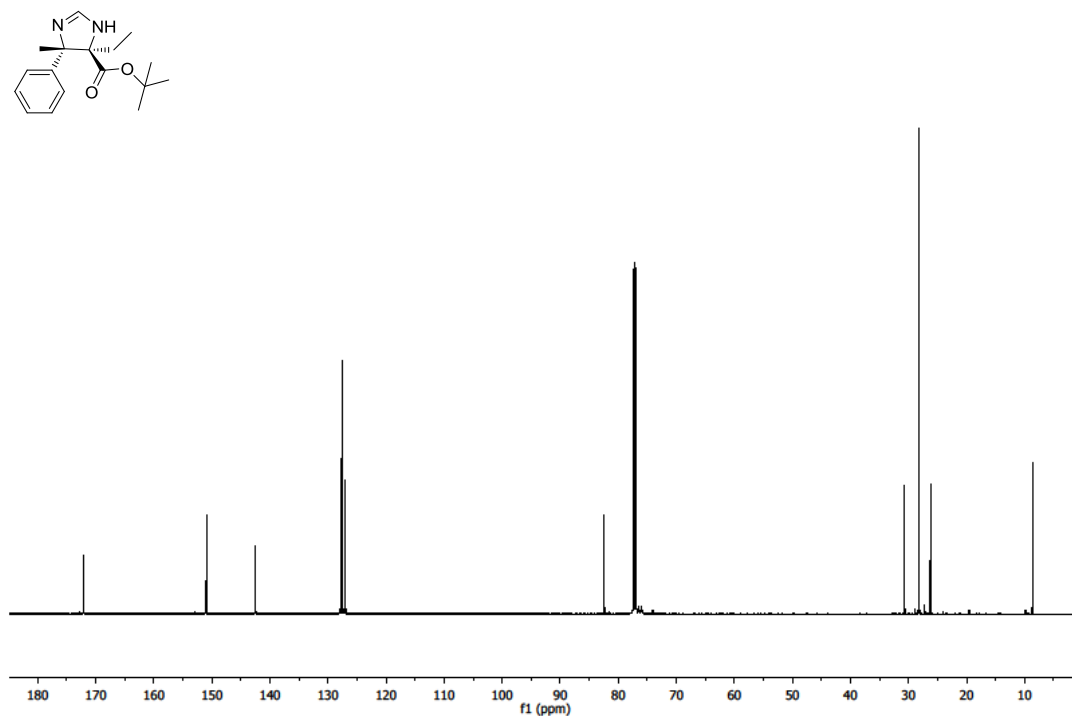

## HPLC traces of imidazoline 5p

### Racemic

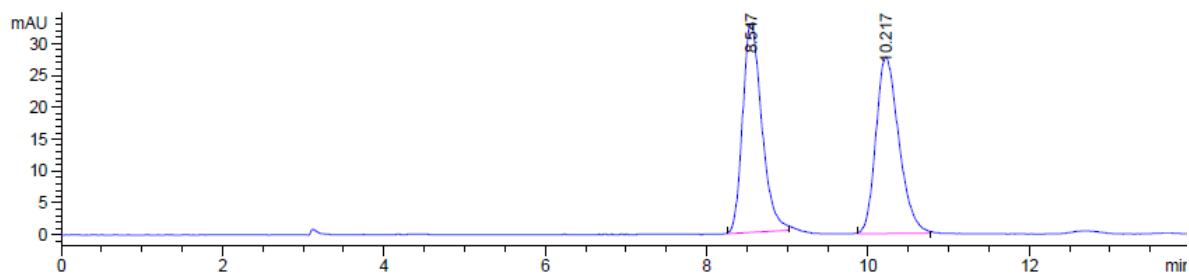

| Peak # | RetTime [min] | Type | Width [min] | Area [mAU*s] | Height [mAU] | Area %  |
|--------|---------------|------|-------------|--------------|--------------|---------|
| 1      | 8.547         | BB   | 0.2520      | 539.70135    | 32.78625     | 49.6545 |
| 2      | 10.217        | BB   | 0.3046      | 547.21179    | 27.68389     | 50.3455 |

Totals :                      1086.91315    60.47013

### Enantioenriched

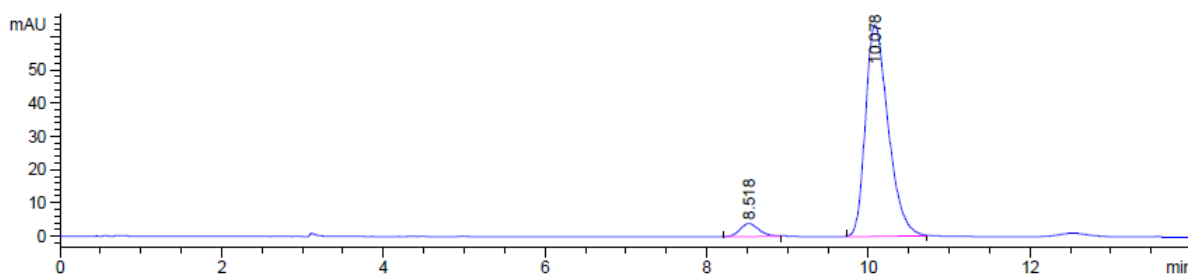

| Peak # | RetTime [min] | Type | Width [min] | Area [mAU*s] | Height [mAU] | Area %  |
|--------|---------------|------|-------------|--------------|--------------|---------|
| 1      | 8.518         | BB   | 0.2512      | 63.61702     | 3.88254      | 4.8731  |
| 2      | 10.078        | BB   | 0.2995      | 1241.85059   | 63.69743     | 95.1269 |

Totals :                      1305.46760    67.57997

#### 4.17 $^1\text{H-NMR}$ , $^{13}\text{C-NMR}$ , NOE and HPLC traces of imidazoline 5q

##### $^1\text{H-NMR}$

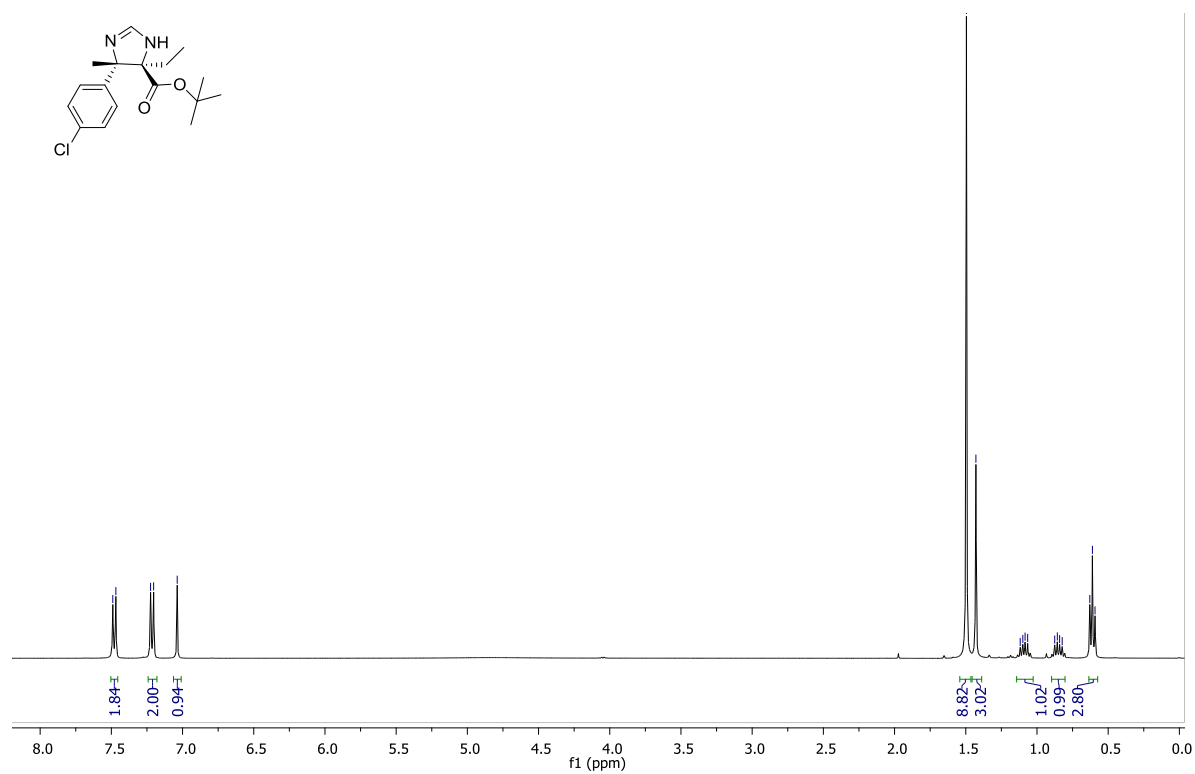

##### $^{13}\text{C-NMR}$

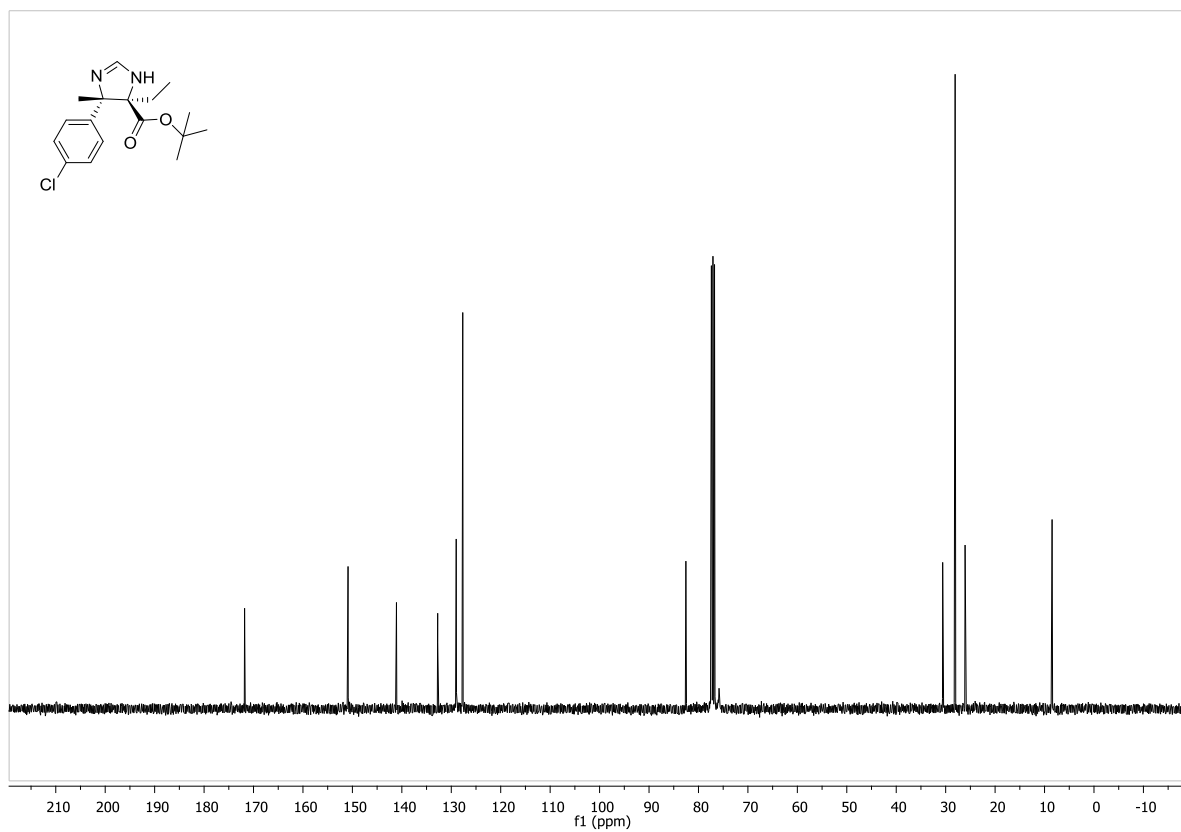

# nOe in the $^1\text{H-NMR}$ of imidazoline 5q

$\text{CDCl}_3$ , 400 MHz,  $T_{\text{mix}}$  800 ms

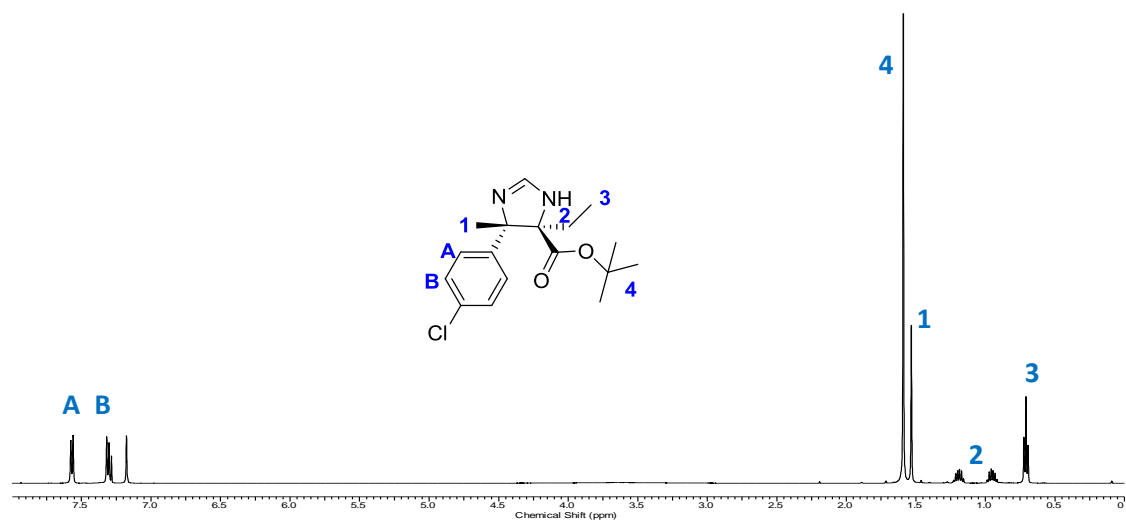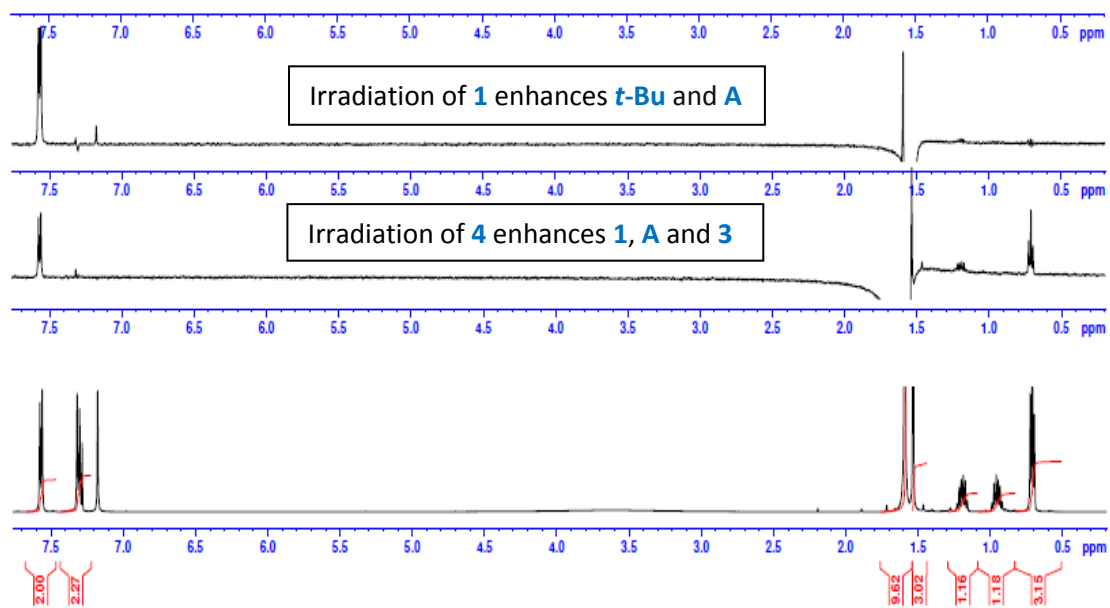

## HPLC traces of imidazoline 5q

### Racemic

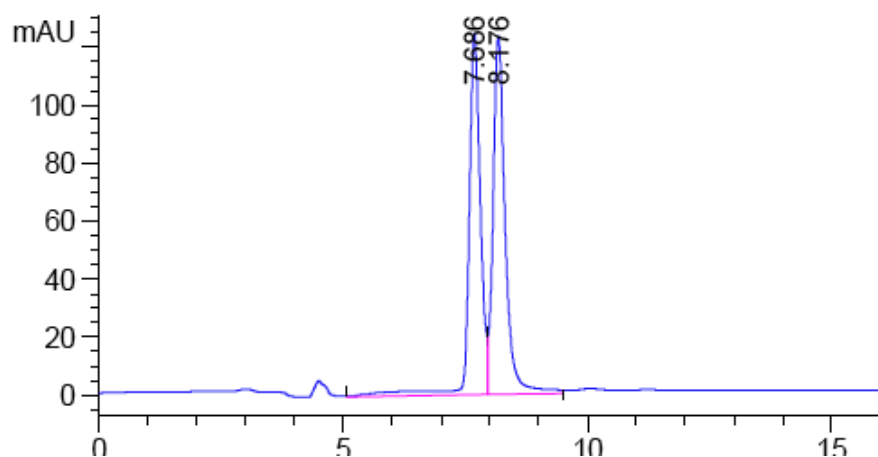

| Peak # | RetTime [min] | Type | Width [min] | Area [mAU*s] | Height [mAU] | Area %  |
|--------|---------------|------|-------------|--------------|--------------|---------|
| 1      | 7.686         | VV   | 0.2443      | 2051.85498   | 124.48985    | 48.7914 |
| 2      | 8.176         | VB   | 0.2601      | 2153.50586   | 123.09373    | 51.2086 |

### Enantioenriched

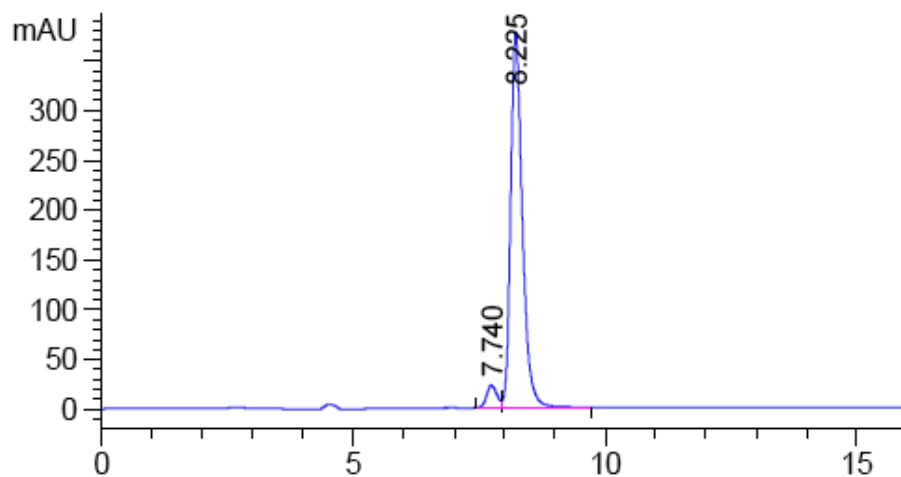

| Peak # | RetTime [min] | Type | Width [min] | Area [mAU*s] | Height [mAU] | Area %  |
|--------|---------------|------|-------------|--------------|--------------|---------|
| 1      | 7.740         | BV   | 0.2257      | 349.47983    | 23.47752     | 5.3510  |
| 2      | 8.225         | VB   | 0.2465      | 6181.67236   | 378.53668    | 94.6490 |

#### 4.18 $^1\text{H-NMR}$ , $^{13}\text{C-NMR}$ and HPLC traces of imidazoline 5r

##### $^1\text{H-NMR}$

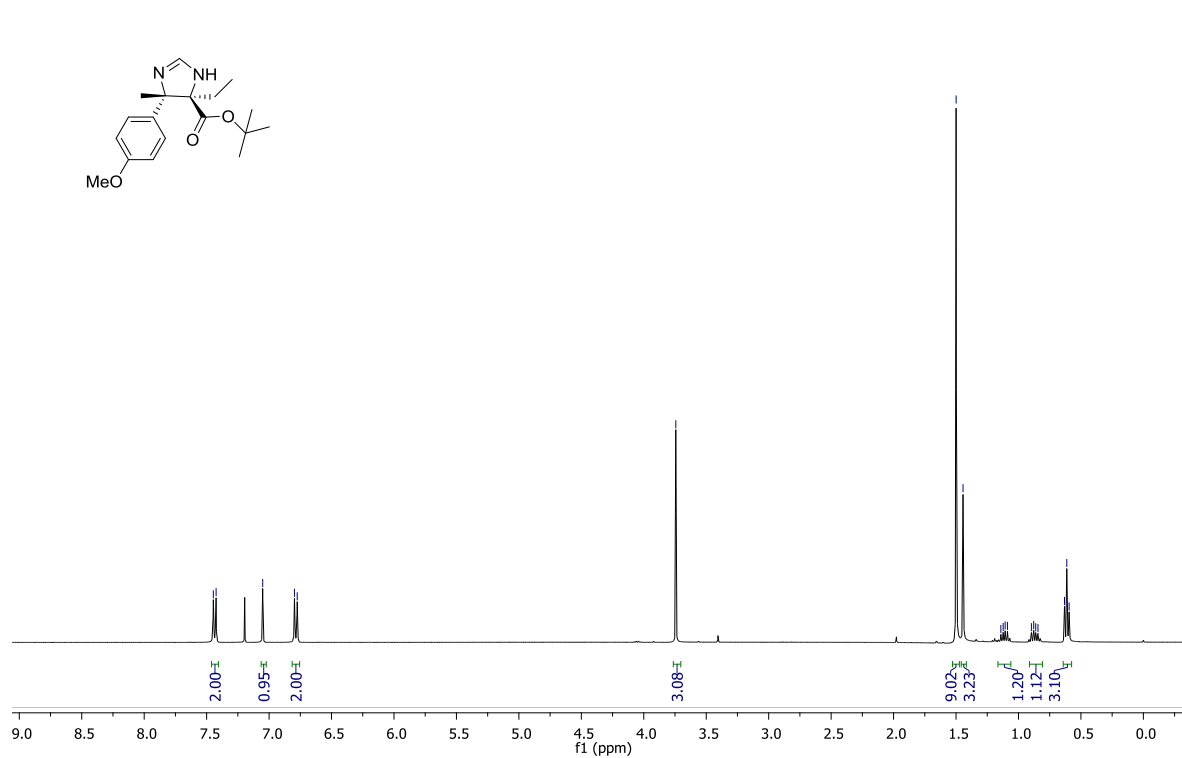

##### $^{13}\text{C-NMR}$

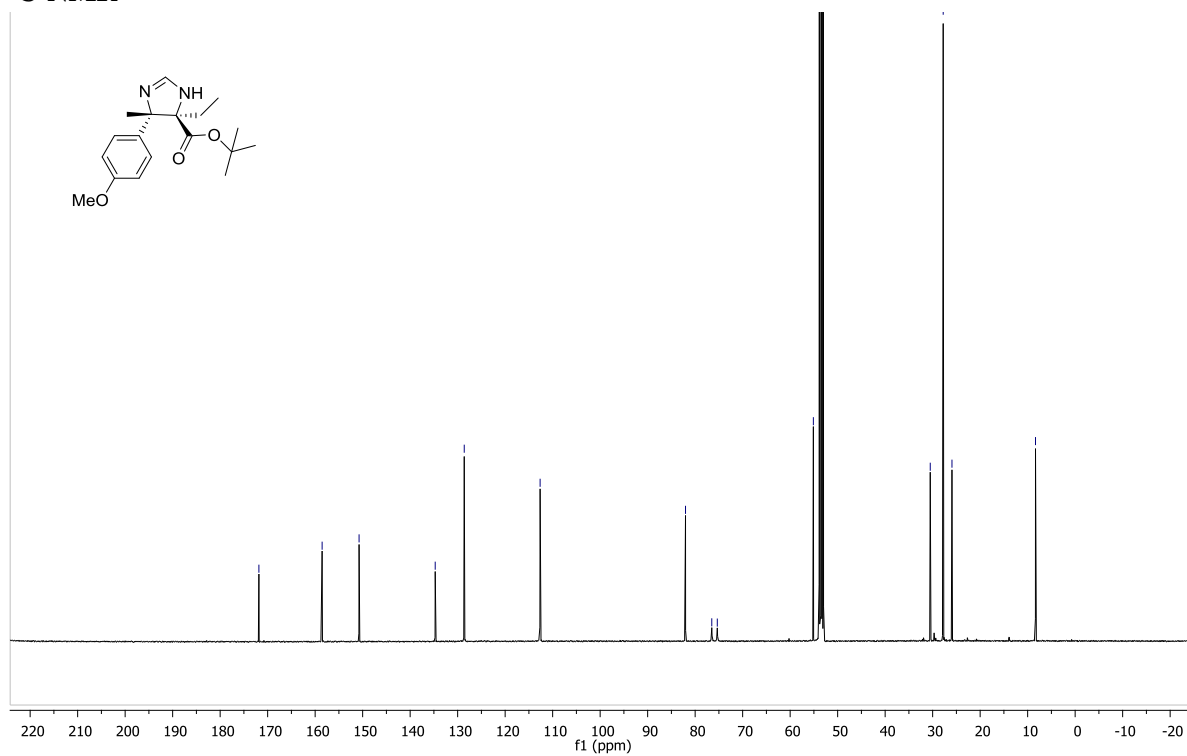

## HPLC traces of imidazoline 5r

### Racemic

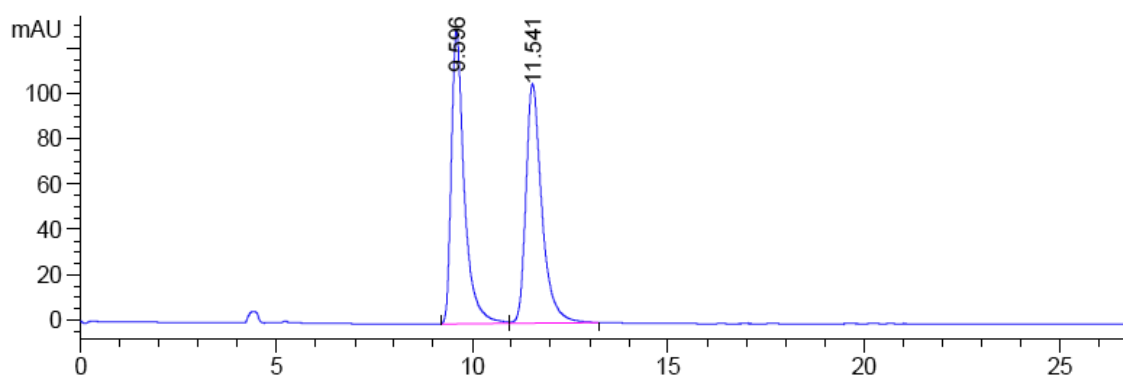

| Peak # | RetTime [min] | Type | Width [min] | Area [mAU*s] | Height [mAU] | Area %  |
|--------|---------------|------|-------------|--------------|--------------|---------|
| 1      | 9.596         | BV   | 0.3443      | 2978.76978   | 129.54291    | 49.8505 |
| 2      | 11.541        | VB   | 0.4229      | 2996.63232   | 105.65739    | 50.1495 |

### Enantioenriched

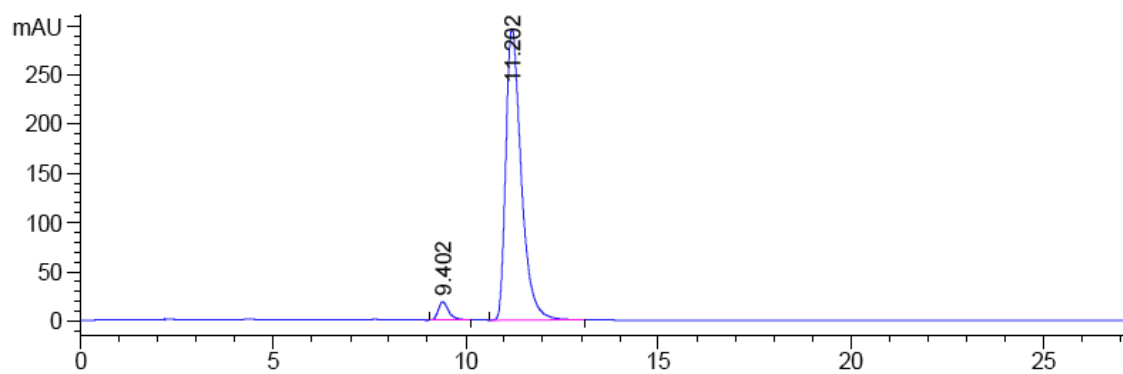

| Peak # | RetTime [min] | Type | Width [min] | Area [mAU*s] | Height [mAU] | Area %  |
|--------|---------------|------|-------------|--------------|--------------|---------|
| 1      | 9.402         | VV   | 0.2860      | 1628.91064   | 85.60803     | 4.1329  |
| 2      | 11.202        | VB   | 0.4340      | 3.77839e4    | 1335.86658   | 95.8671 |

#### 4.19 $^1\text{H-NMR}$ , $^{13}\text{C-NMR}$ and HPLC traces of imidazoline 5s

##### $^1\text{H-NMR}$

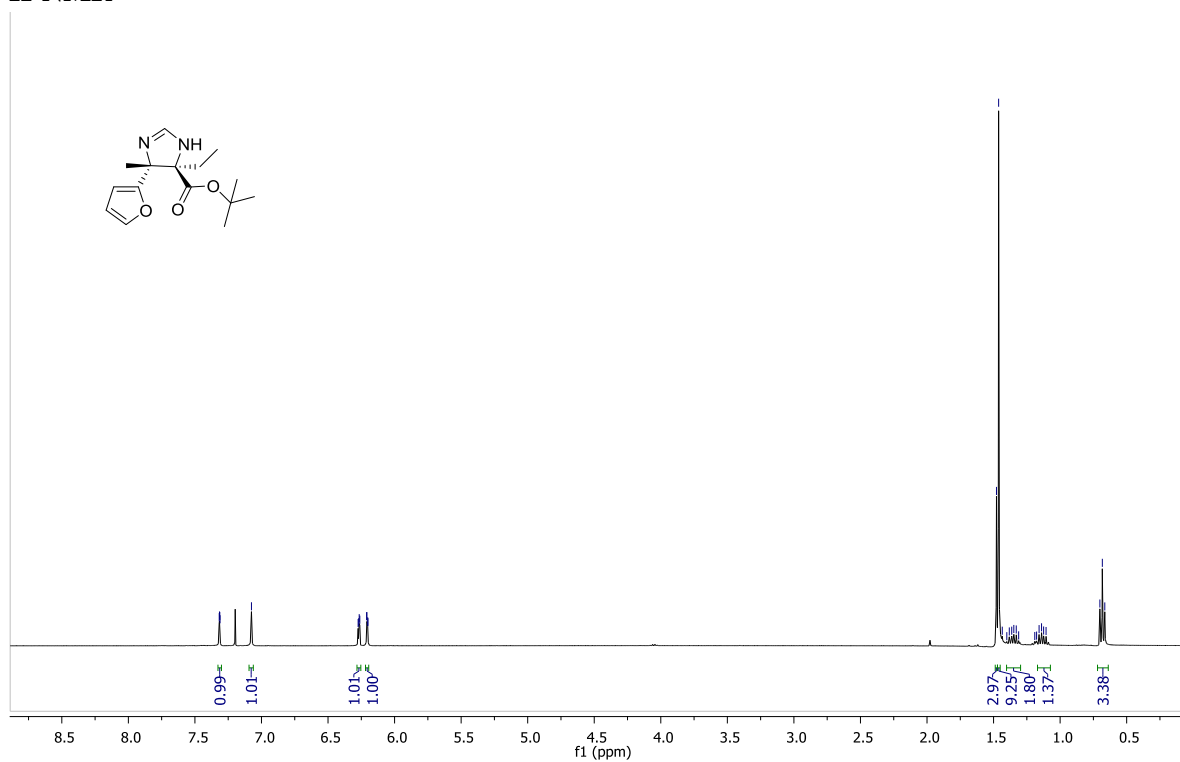

##### $^{13}\text{C-NMR}$

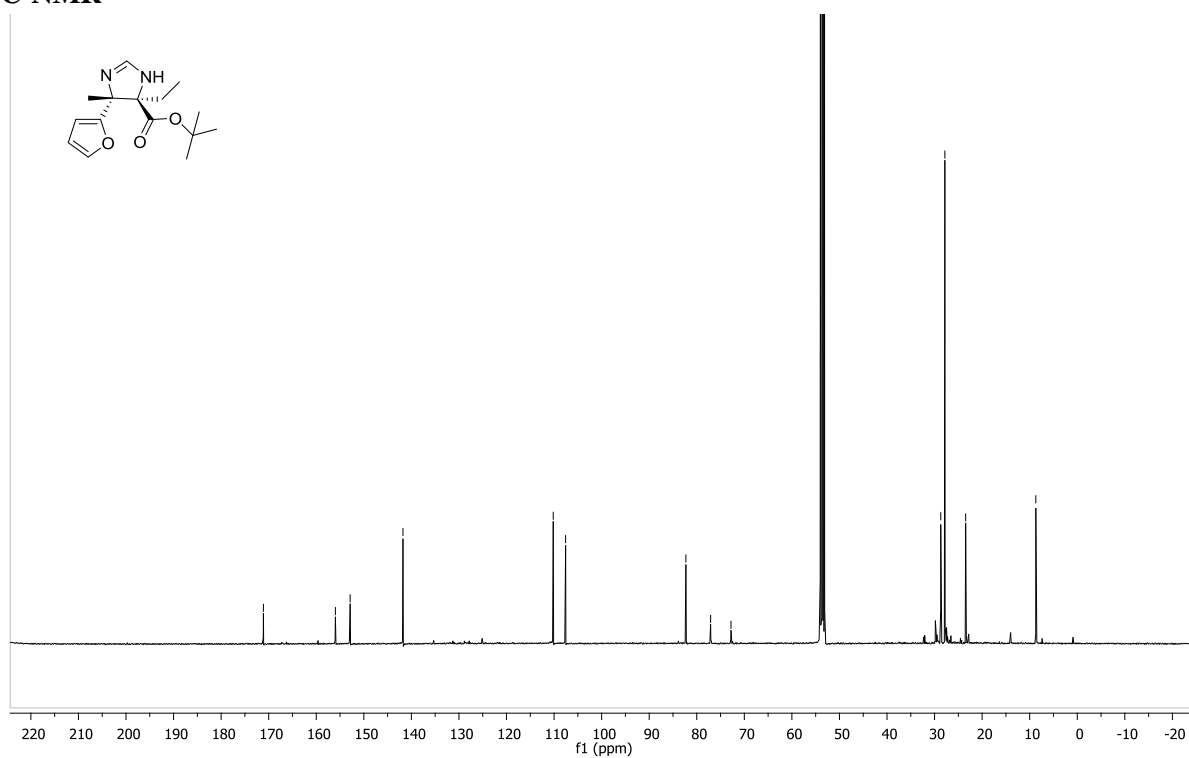



## HPLC traces of imidazoline 5s

### Racemic

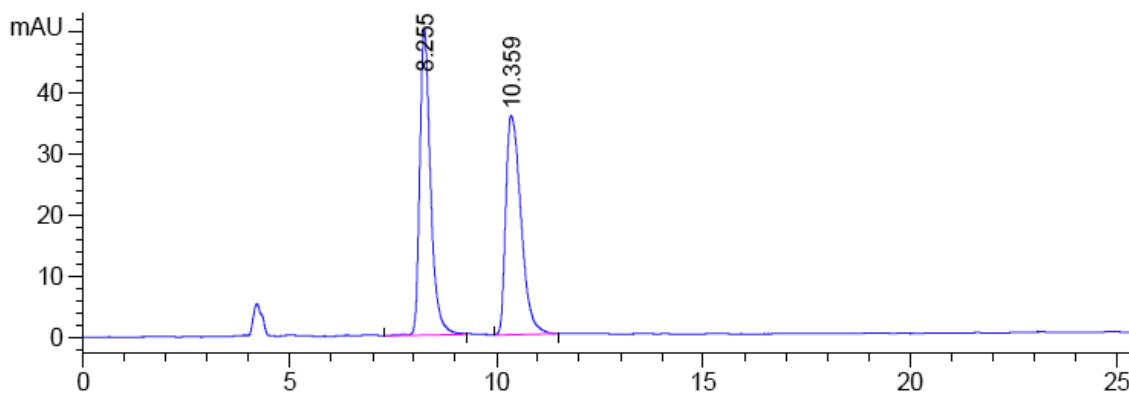

| Peak # | RetTime [min] | Type | Width [min] | Area [mAU*s] | Height [mAU] | Area %  |
|--------|---------------|------|-------------|--------------|--------------|---------|
| 1      | 8.255         | VB   | 0.2759      | 908.65033    | 50.01686     | 49.8919 |
| 2      | 10.359        | BB   | 0.4068      | 912.58704    | 35.62939     | 50.1081 |

### Enantioenriched

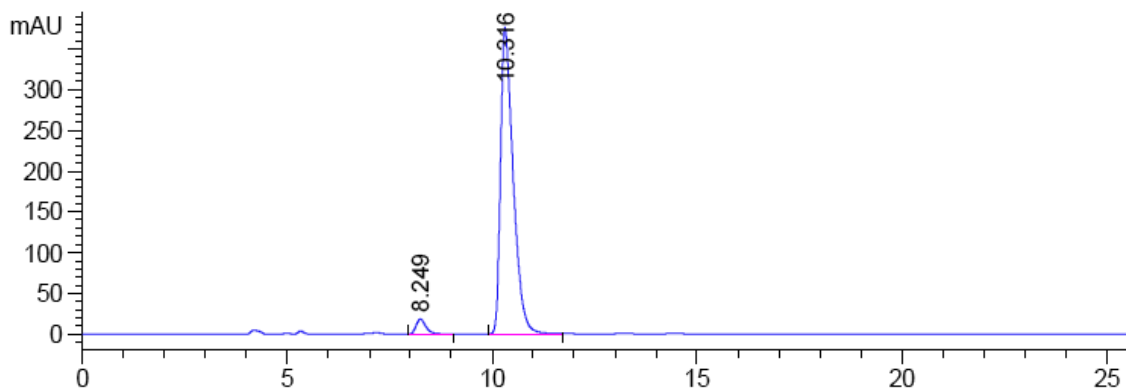

| Peak # | RetTime [min] | Type | Width [min] | Area [mAU*s] | Height [mAU] | Area %  |
|--------|---------------|------|-------------|--------------|--------------|---------|
| 1      | 8.249         | BB   | 0.2566      | 312.27069    | 18.53080     | 3.7400  |
| 2      | 10.316        | BB   | 0.3132      | 8037.21729   | 376.33499    | 96.2600 |

#### 4.20 $^1\text{H-NMR}$ , $^{13}\text{C-NMR}$ and HPLC traces of imidazoline 5t

##### $^1\text{H-NMR}$

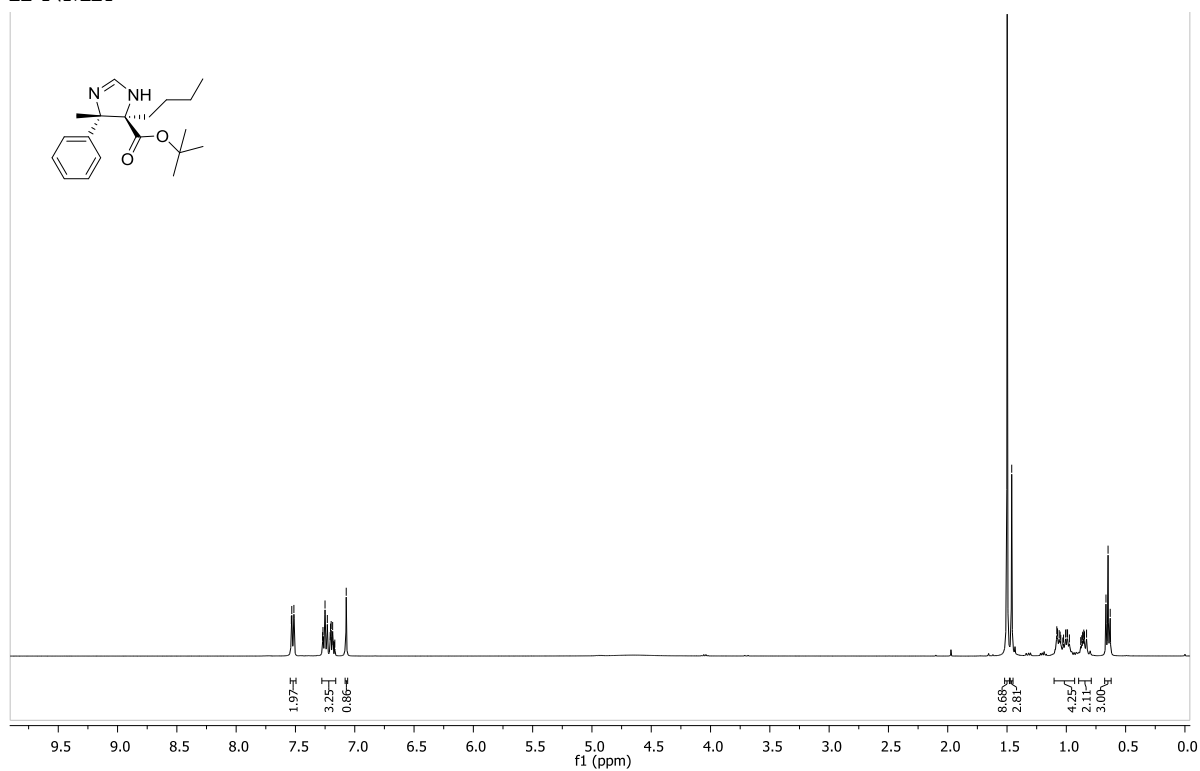

##### $^{13}\text{C-NMR}$

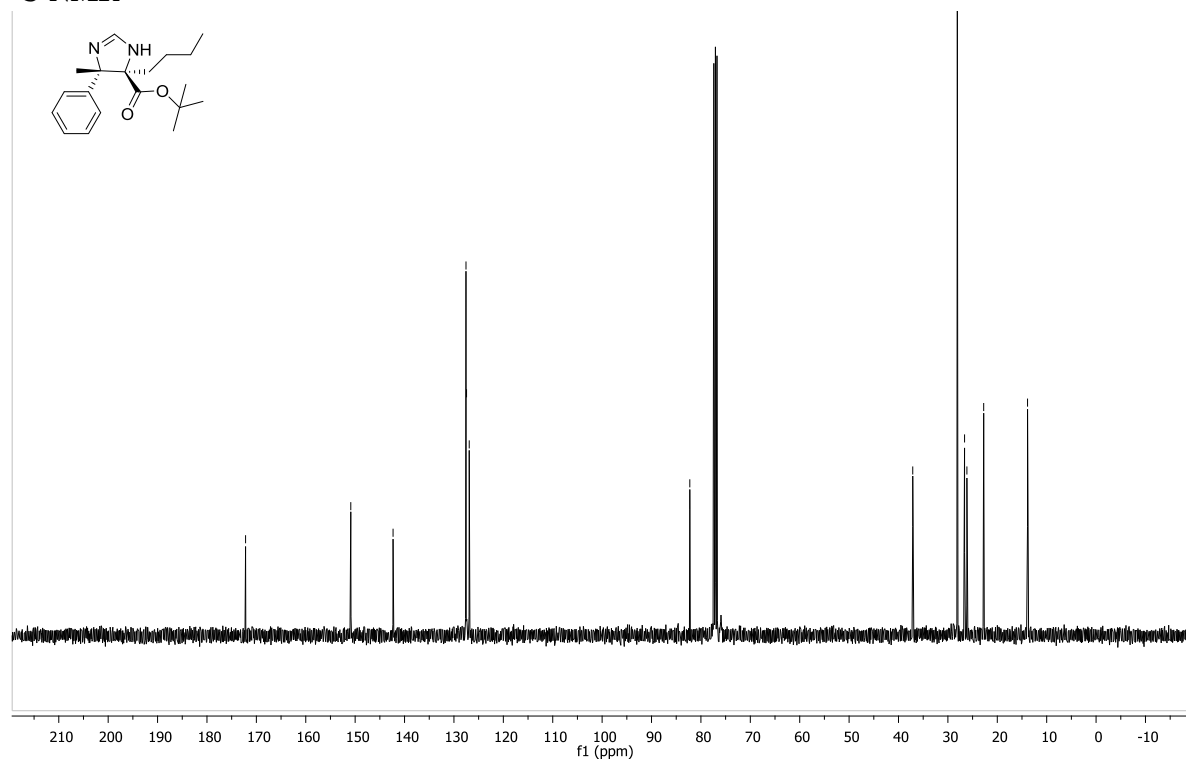

## HPLC traces of imidazoline 5t

### Racemic

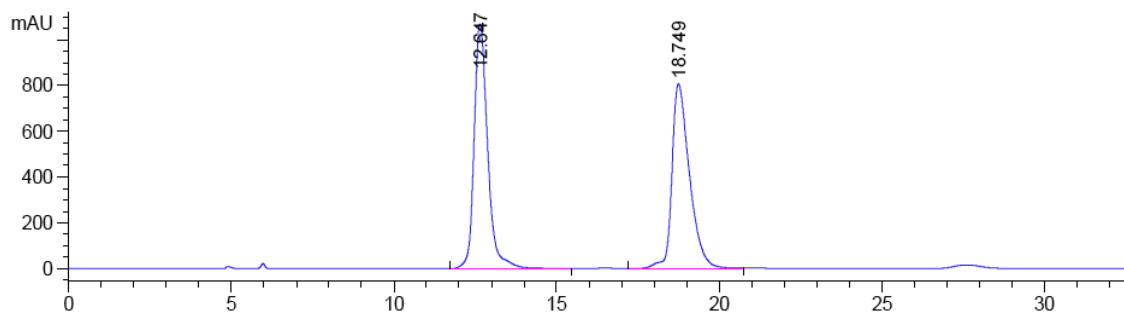

| Peak # | RetTime [min] | Type | Width [min] | Area [mAU*s] | Height [mAU] | Area %  |
|--------|---------------|------|-------------|--------------|--------------|---------|
| 1      | 12.647        | BB   | 0.4422      | 3.09712e4    | 1068.35327   | 50.5255 |
| 2      | 18.749        | VB   | 0.5580      | 3.03271e4    | 807.86121    | 49.4745 |

### Enantioenriched

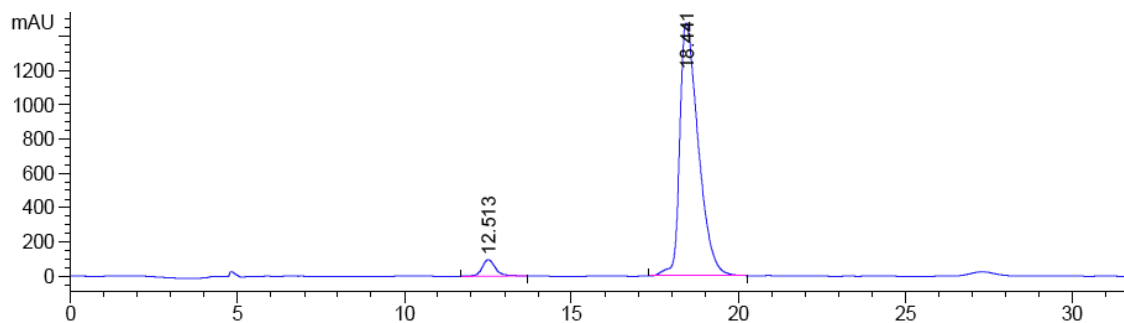

| Peak # | RetTime [min] | Type | Width [min] | Area [mAU*s] | Height [mAU] | Area %  |
|--------|---------------|------|-------------|--------------|--------------|---------|
| 1      | 12.513        | BB   | 0.4215      | 2708.96924   | 95.35264     | 4.5378  |
| 2      | 18.441        | BB   | 0.5618      | 5.69885e4    | 1471.47949   | 95.4622 |

#### 4.21 $^1\text{H-NMR}$ , $^{13}\text{C-NMR}$ and HPLC traces of imidazoline 5u

##### $^1\text{H-NMR}$

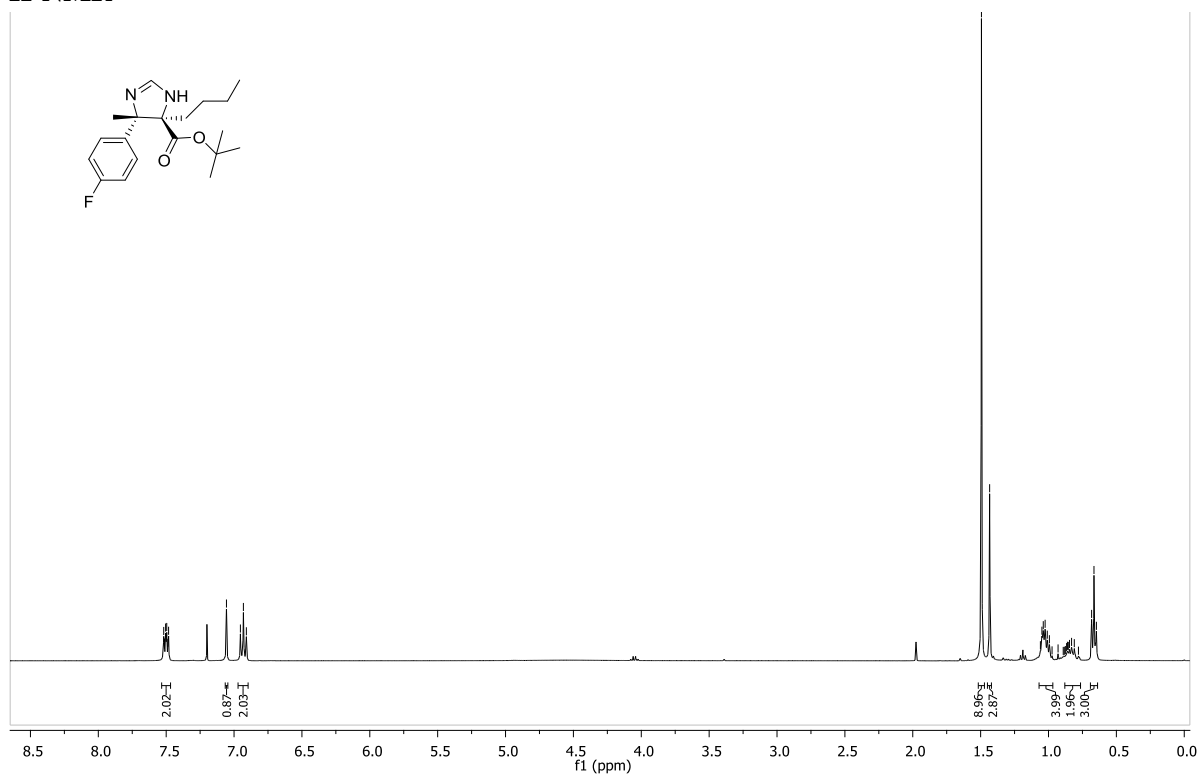

##### $^{13}\text{C-NMR}$

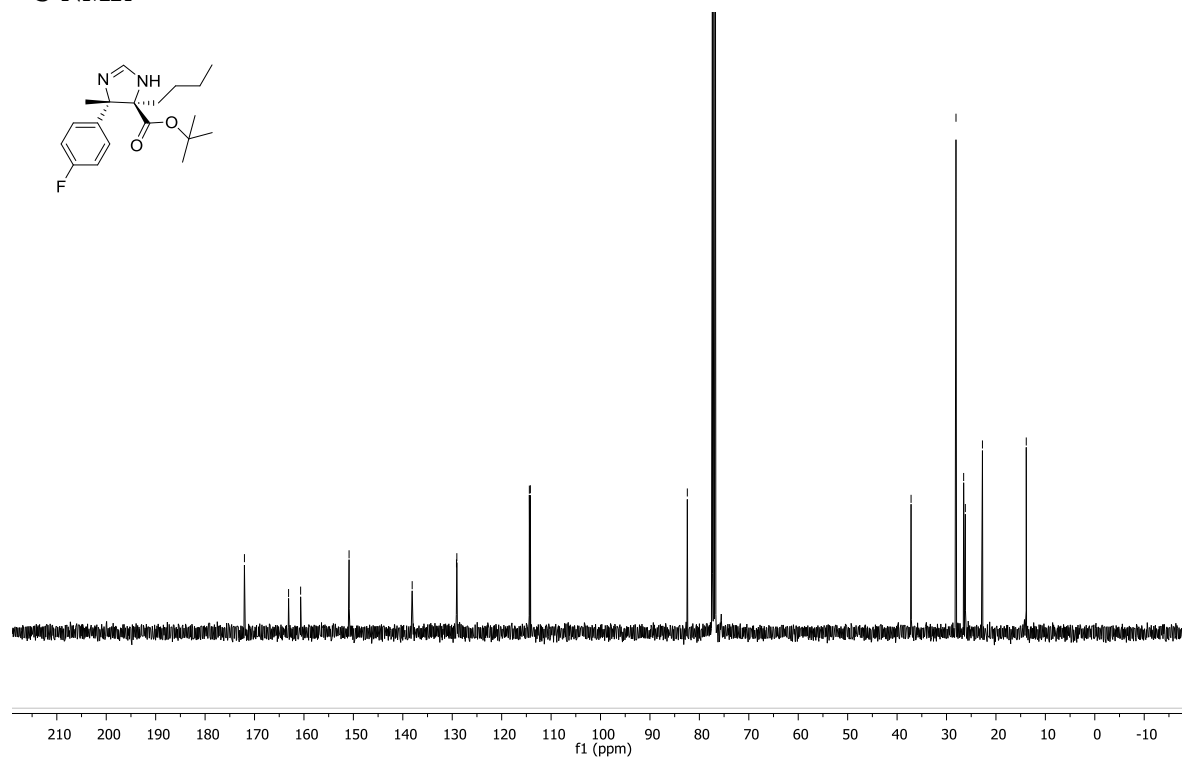

## HPLC traces of imidazoline 5u

### Racemic

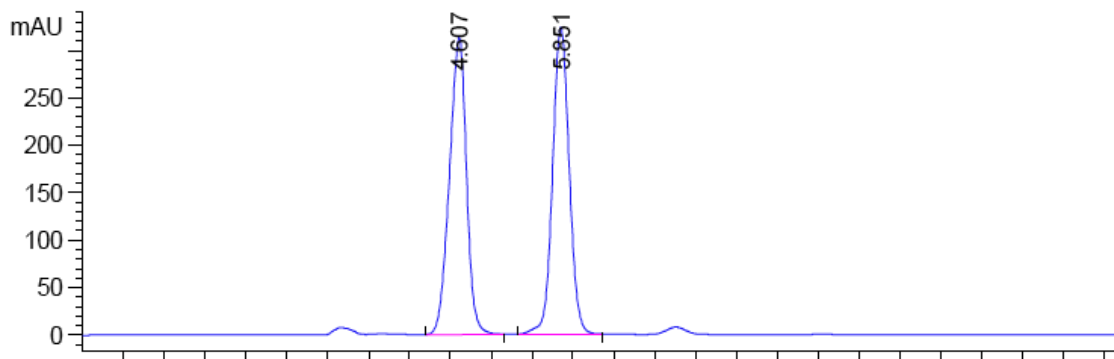

| Peak # | RetTime [min] | Type | Width [min] | Area [mAU*s] | Height [mAU] | Area %  |
|--------|---------------|------|-------------|--------------|--------------|---------|
| 1      | 4.607         | BB   | 0.2232      | 2502.23291   | 172.52979    | 49.8825 |
| 2      | 5.851         | BB   | 0.2185      | 2514.02148   | 178.28250    | 50.1175 |

### Enantioenriched

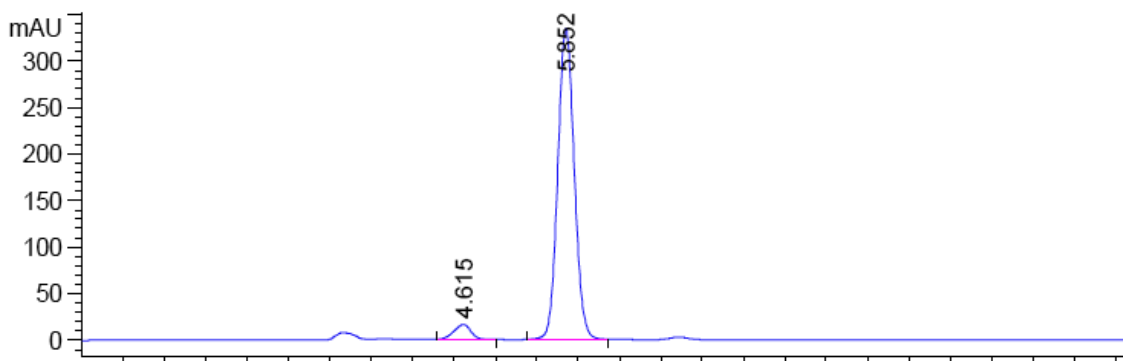

| Peak # | RetTime [min] | Type | Width [min] | Area [mAU*s] | Height [mAU] | Area %  |
|--------|---------------|------|-------------|--------------|--------------|---------|
| 1      | 4.615         | BB   | 0.2226      | 237.77773    | 16.25991     | 4.8839  |
| 2      | 5.852         | BB   | 0.2178      | 4630.81934   | 333.90622    | 95.1161 |

## 4.22 $^1\text{H-NMR}$ , $^{13}\text{C-NMR}$ , NOE and HPLC traces of imidazoline 5v

### $^1\text{H-NMR}$

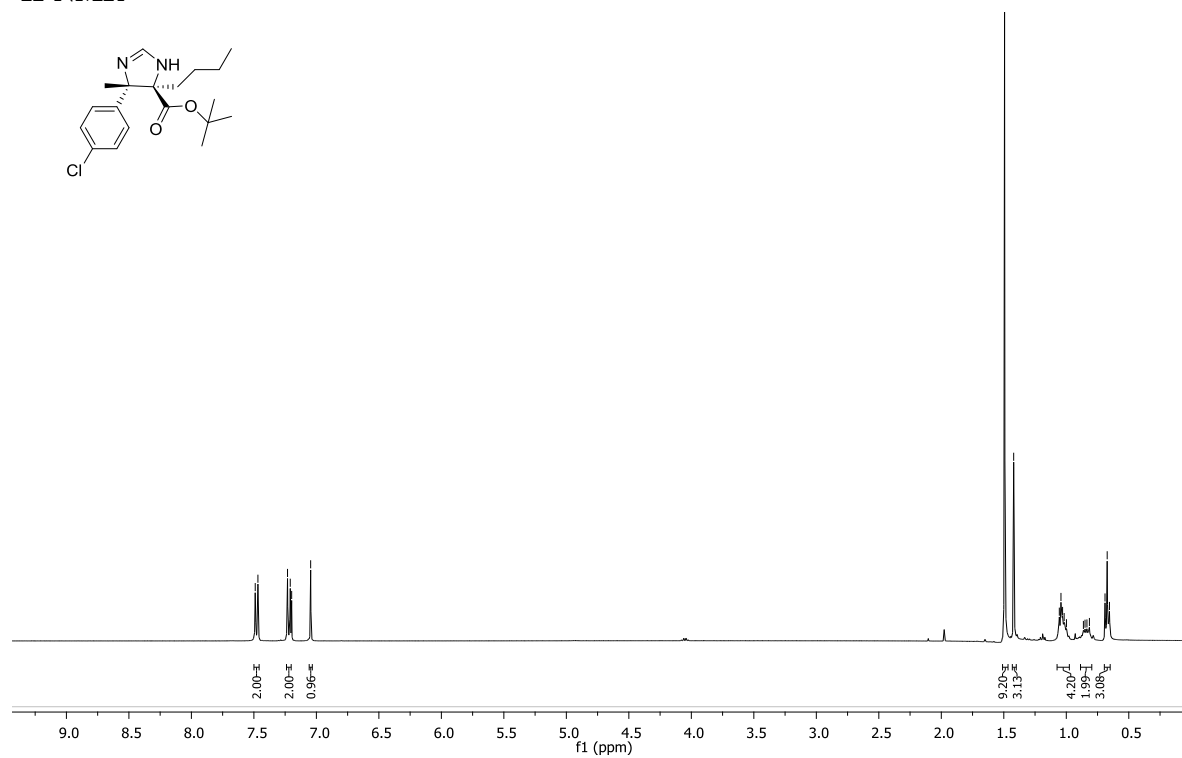

### $^{13}\text{C-NMR}$

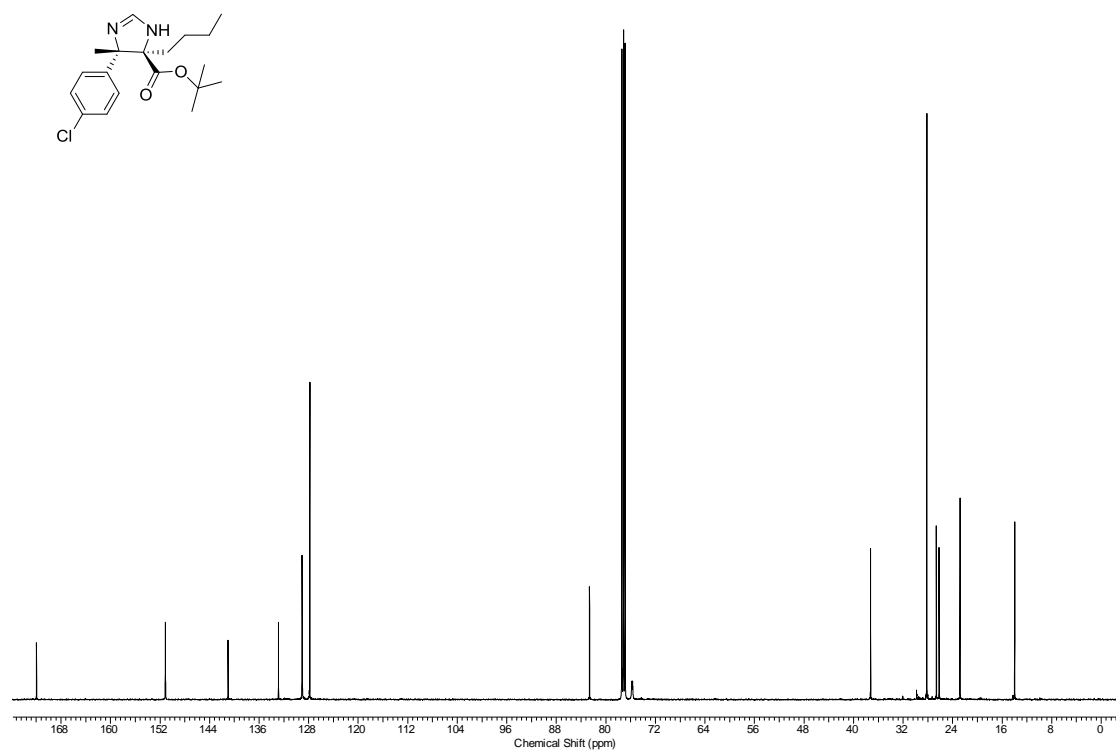

# nOe in the $^1\text{H-NMR}$ of imidazoline 5v

$\text{CDCl}_3$ , 400 MHz,  $T_{\text{mix}}$  800 ms

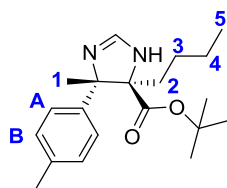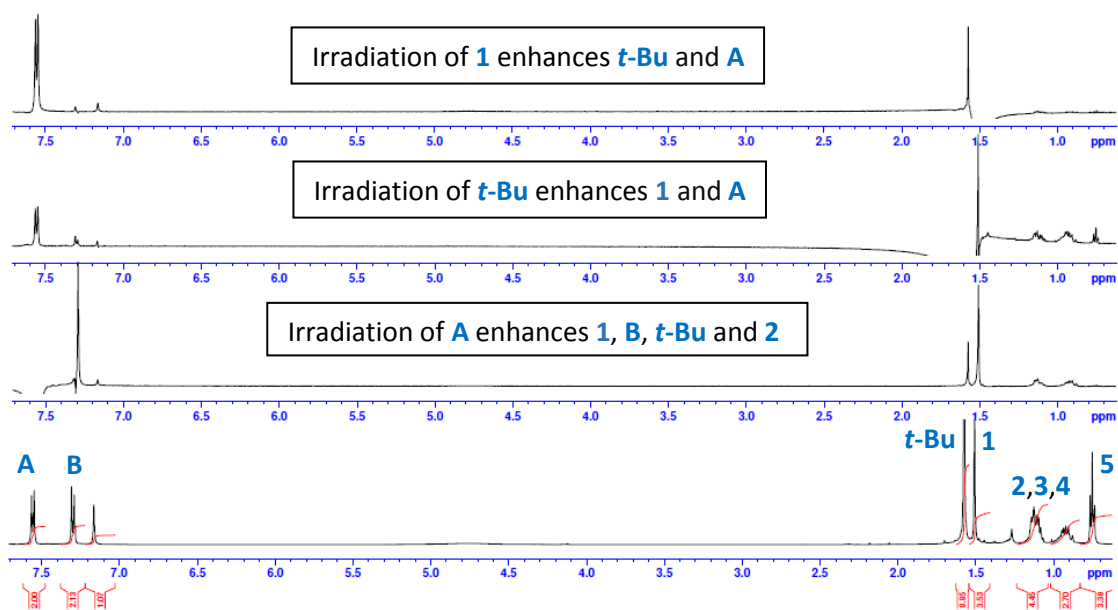

## HPLC traces of imidazoline 5v

### Racemic

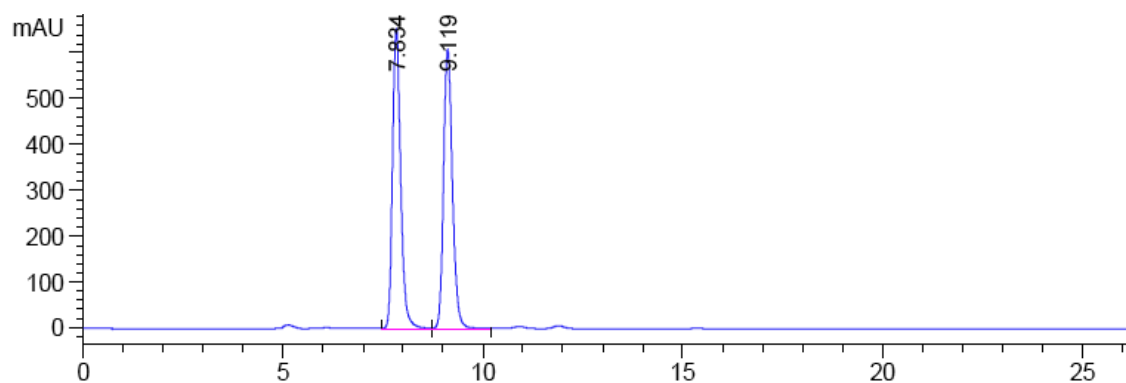

| Peak # | RetTime [min] | Type | Width [min] | Area [mAU*s] | Height [mAU] | Area %  |
|--------|---------------|------|-------------|--------------|--------------|---------|
| 1      | 7.834         | BV   | 0.2187      | 9340.56738   | 653.65997    | 49.7834 |
| 2      | 9.119         | VV   | 0.2368      | 9421.85938   | 607.96771    | 50.2166 |

### Enantioenriched

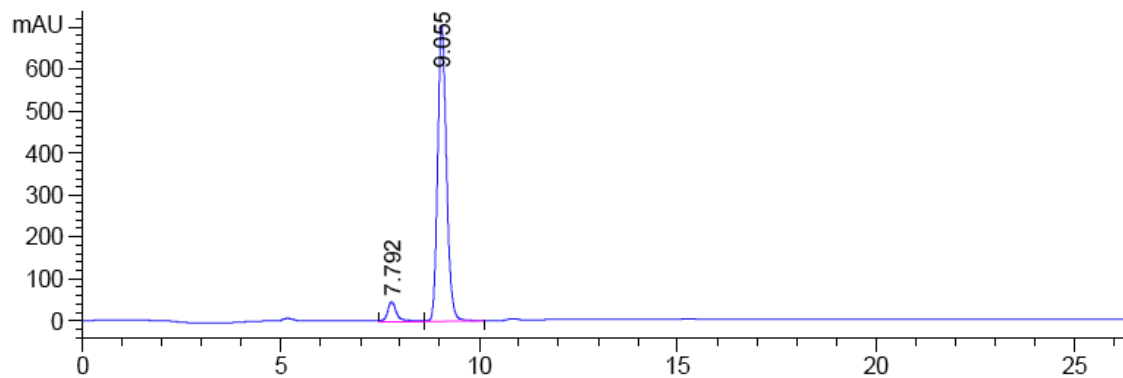

| Peak # | RetTime [min] | Type | Width [min] | Area [mAU*s] | Height [mAU] | Area %  |
|--------|---------------|------|-------------|--------------|--------------|---------|
| 1      | 7.793         | BB   | 0.2247      | 579.14594    | 39.58824     | 5.7568  |
| 2      | 9.054         | BB   | 0.2351      | 9481.12500   | 617.69049    | 94.2432 |



#### 4.23 $^1\text{H-NMR}$ , $^{13}\text{C-NMR}$ and HPLC traces of imidazoline 5w

##### $^1\text{H-NMR}$

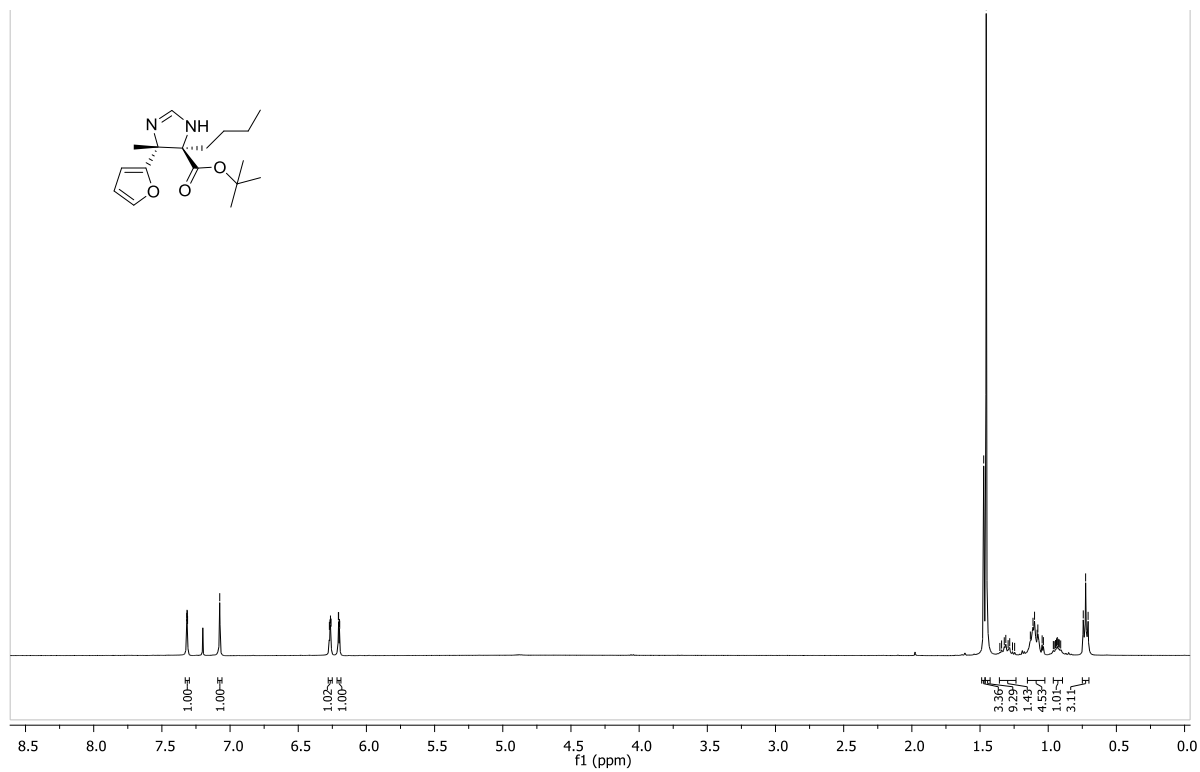

##### $^{13}\text{C-NMR}$

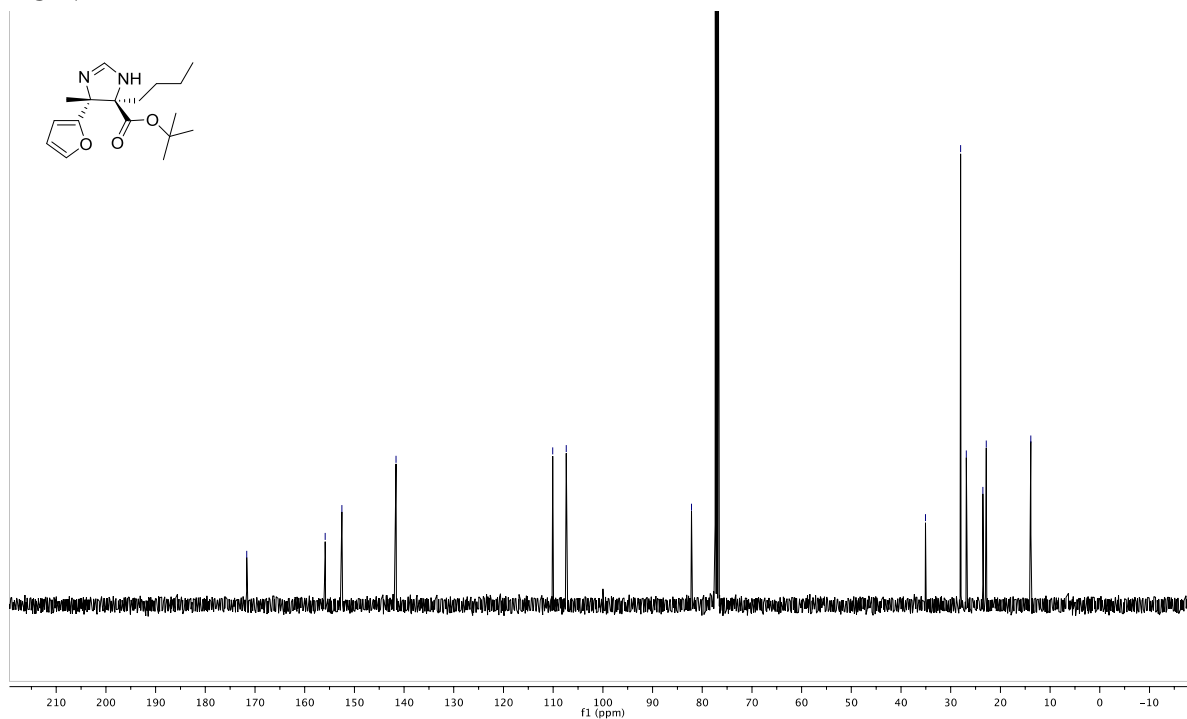

## HPLC traces of imidazoline 5w

### Racemic

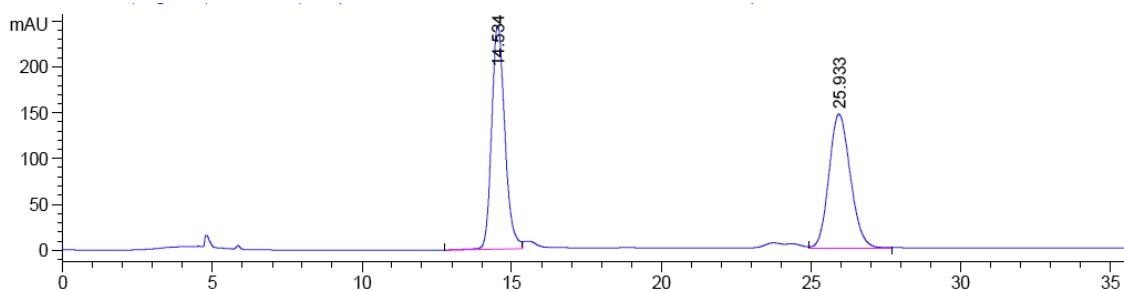

| Peak # | RetTime [min] | Type | Width [min] | Area [mAU*s] | Height [mAU] | Area %  |
|--------|---------------|------|-------------|--------------|--------------|---------|
| 1      | 14.534        | BV   | 0.4700      | 7489.09424   | 244.06279    | 50.8220 |
| 2      | 25.933        | VB   | 0.7672      | 7246.82715   | 145.96376    | 49.1780 |

### Enantioenriched

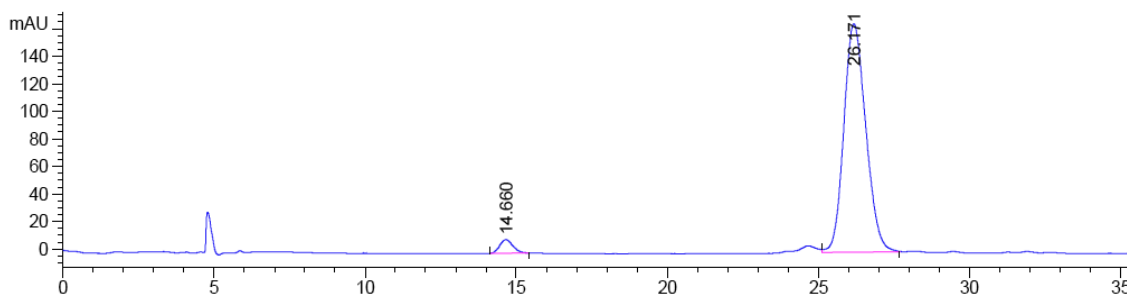

| Peak # | RetTime [min] | Type | Width [min] | Area [mAU*s] | Height [mAU] | Area %  |
|--------|---------------|------|-------------|--------------|--------------|---------|
| 1      | 14.660        | BB   | 0.4377      | 298.53610    | 9.84651      | 3.4401  |
| 2      | 26.171        | VB   | 0.7436      | 8379.67383   | 165.80602    | 96.5599 |

#### 4.24 $^1\text{H-NMR}$ , $^{13}\text{C-NMR}$ and HPLC traces of imidazoline 5y

##### $^1\text{H-NMR}$

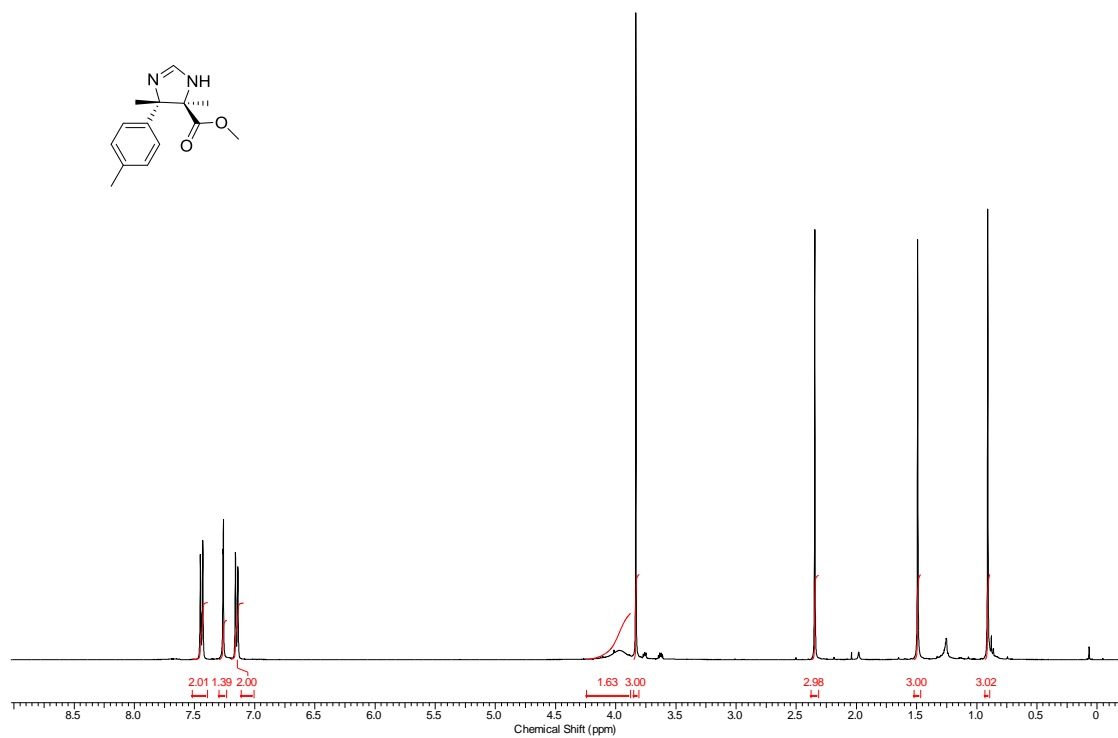

##### $^{13}\text{C-NMR}$

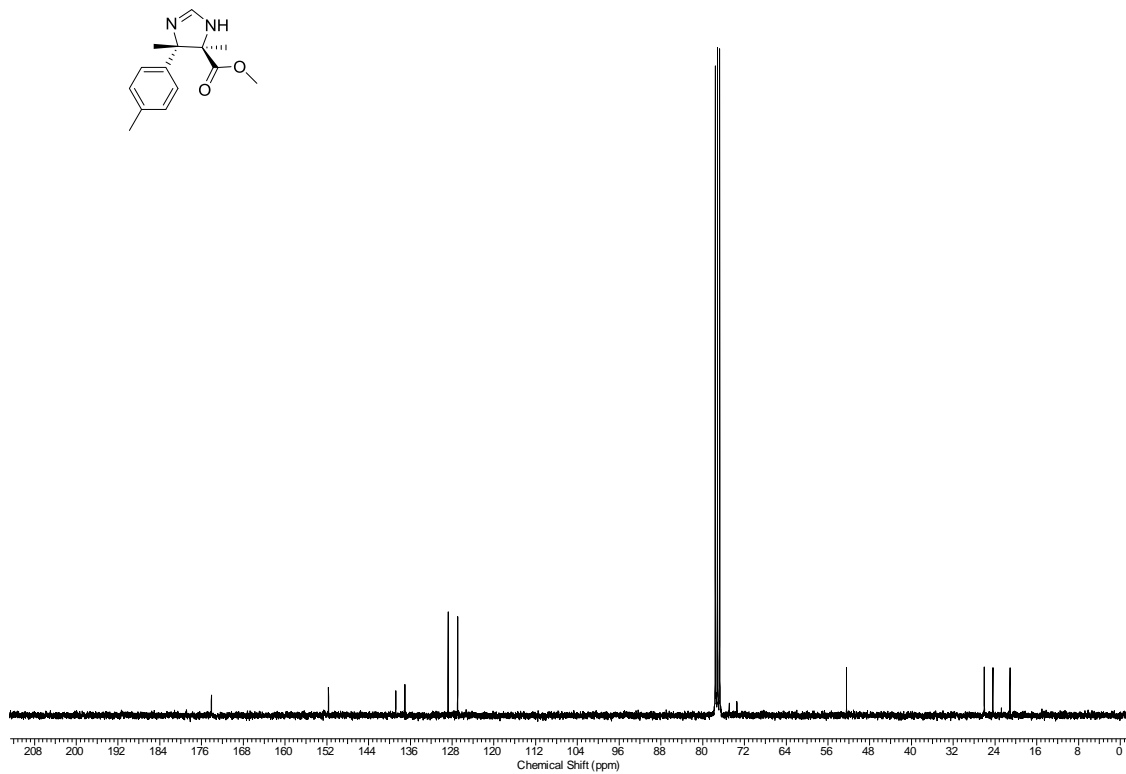

## HPLC traces of imidazoline 5y

### Racemic

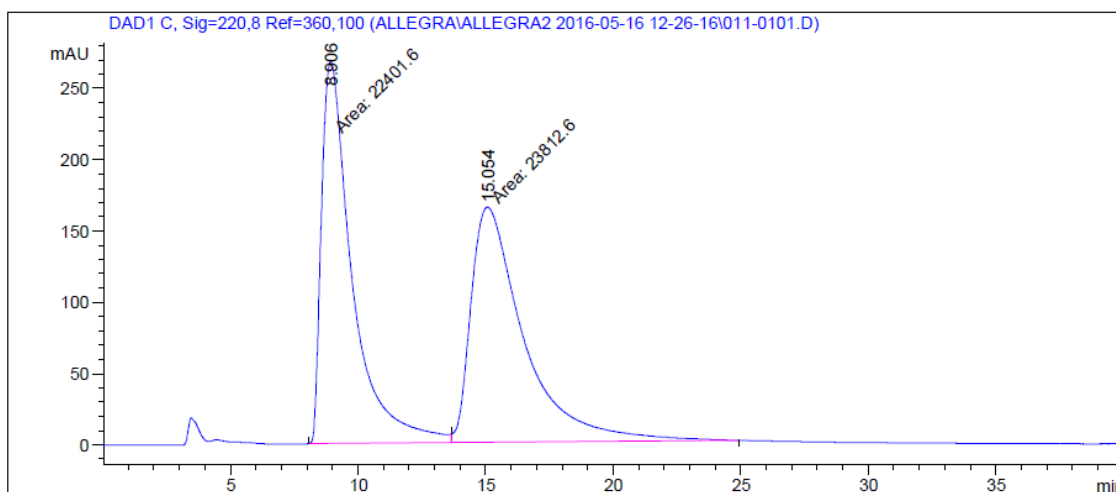

| Peak # | RetTime [min] | Type | Width [min] | Area [mAU*s] | Height [mAU] | Area %  |
|--------|---------------|------|-------------|--------------|--------------|---------|
| 1      | 8.906         | MF   | 1.3956      | 2.24016e4    | 267.52496    | 48.4734 |
| 2      | 15.054        | FM   | 2.4066      | 2.38126e4    | 164.91110    | 51.5266 |

### Enantioenriched

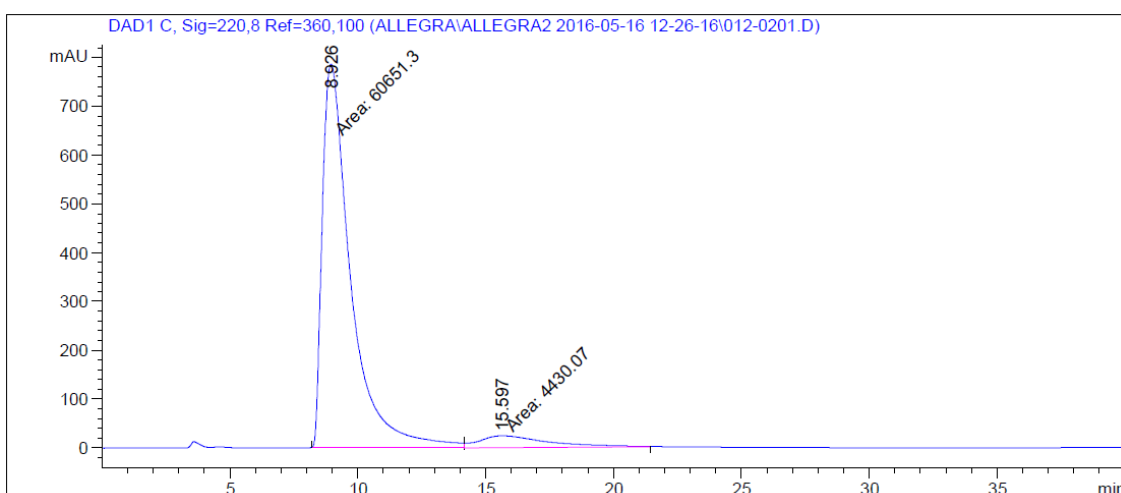

| Peak # | RetTime [min] | Type | Width [min] | Area [mAU*s] | Height [mAU] | Area %  |
|--------|---------------|------|-------------|--------------|--------------|---------|
| 1      | 8.926         | MF   | 1.2861      | 6.06513e4    | 785.98505    | 93.1930 |
| 2      | 15.597        | MM   | 3.0714      | 4430.06934   | 24.03913     | 6.8070  |

## 5 $^1\text{H-NMR}$ and $^{13}\text{C-NMR}$ of imidazoline derivatives

### 5.1 $^1\text{H-NMR}$ and $^{13}\text{C-NMR}$ of 6c

#### $^1\text{H-NMR}$

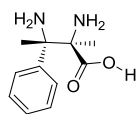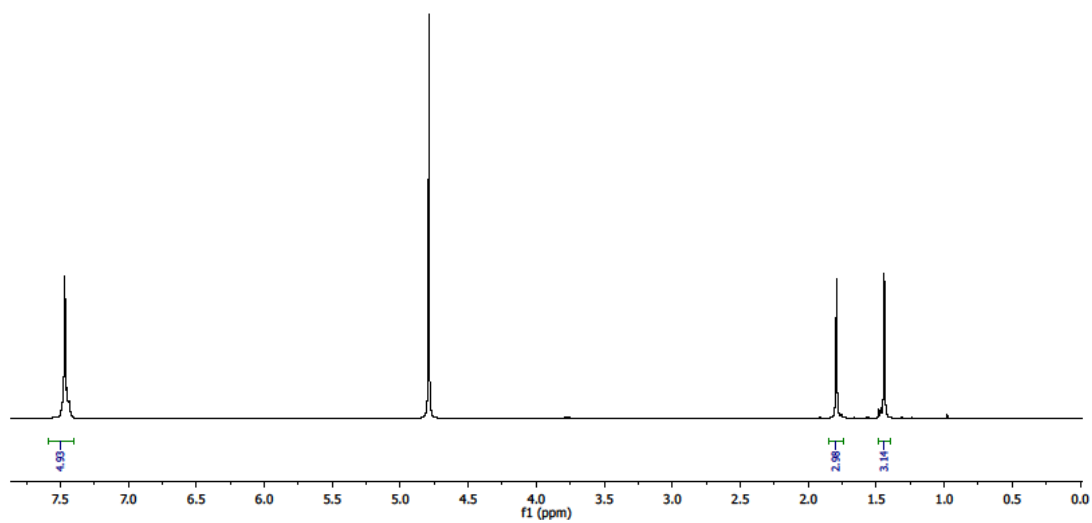

#### $^{13}\text{C-NMR}$

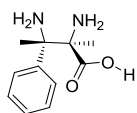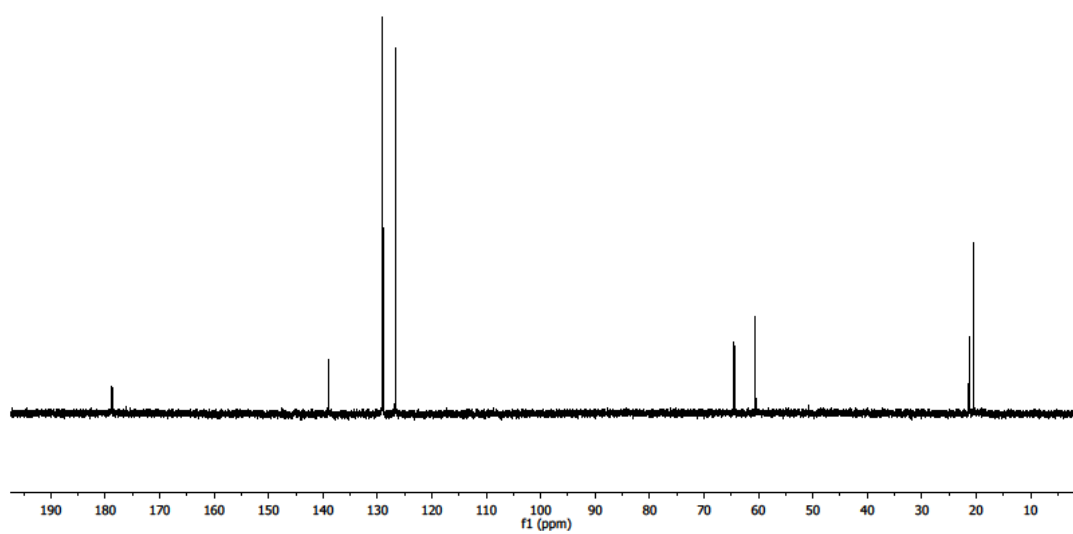

## 6 NMR studies of 1a·AgOAc complex

### 6.1 <sup>1</sup>H-NMR spectra

Low temperature <sup>1</sup>H NMR experiments were also performed. On complexation of 1a with silver acetate the NMR spectrum of the complex appears more resolved. In particular H-9 and H-8, which appear as very broad multiplets in the free ligand (inset 2, Figure 1.4) are resolved as a triplet and sharper multiplet respectively in 1a·AgOAc. This is indicative of more rigidity about the C-9 amide centre which would arise from complexation with silver. Secondly there is a general downfield shift of the proton signals on complexation with silver but this more prominent in some protons signals with respect to others. Assignment of the <sup>1</sup>H NMR spectrum of both 1a and 1a·AgOAc was done and the change in chemical shift calculated (Table 1.4).

**Table 1.4:**  $\delta_{\text{H}}$  of the aliphatic protons in 1a and 1a·AgOAc with  $\Delta\delta_{\text{H}}$  calculated for complexation.

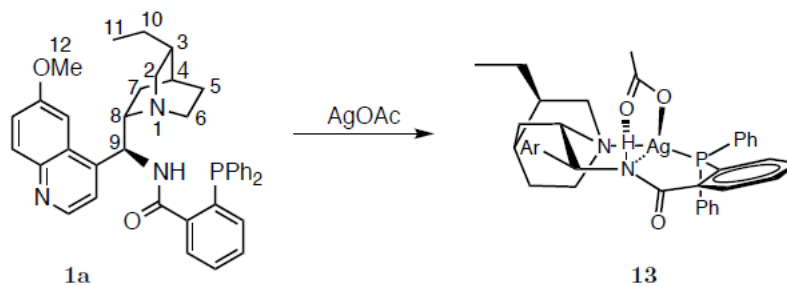

|                           |                  |                  |      |      |                  |                  |                  |                  |
|---------------------------|------------------|------------------|------|------|------------------|------------------|------------------|------------------|
|                           | H-2 <sub>a</sub> | H-2 <sub>b</sub> | H-3  | H-4  | H-5 <sub>a</sub> | H-5 <sub>b</sub> | H-6 <sub>a</sub> | H-6 <sub>b</sub> |
| $\delta_{\text{H}}^a$     | 3.12             | 2.29             | 1.4  | 1.61 | 1.61             | 1.49             | 3.12             | 2.62             |
| $\delta_{\text{H}}^a$     | 3.67             | 2.85             | 1.63 | 1.63 | 1.79             | 1.66             | 3.85             | 3.08             |
| $\Delta\delta_{\text{H}}$ | 0.55             | 0.56             | 0.23 | 0.02 | 0.18             | 0.05             | 0.73             | 0.46             |
|                           | H-7 <sub>a</sub> | H-7 <sub>b</sub> | H-8  | H-9  | H-10             | H-11             | H-12             | N-H              |
| $\delta_{\text{H}}$       | 1.33             | 0.95             | 2.96 | 5.3  | 1.26             | 0.79             | 3.98             | 7.3              |
| $\delta_{\text{H}}$       | 1.58             | 0.75             | 3.79 | 6.06 | 1.42             | 0.87             | 3.89             | 10.7             |
| $\Delta\delta_{\text{H}}$ | 0.25             | -0.20            | 0.83 | 0.76 | 0.16             | 0.08             | -0.09            | ≈3.4             |

<sup>a</sup> $\delta_{\text{H}}$  for overlapping signals were obtained from the HSQC

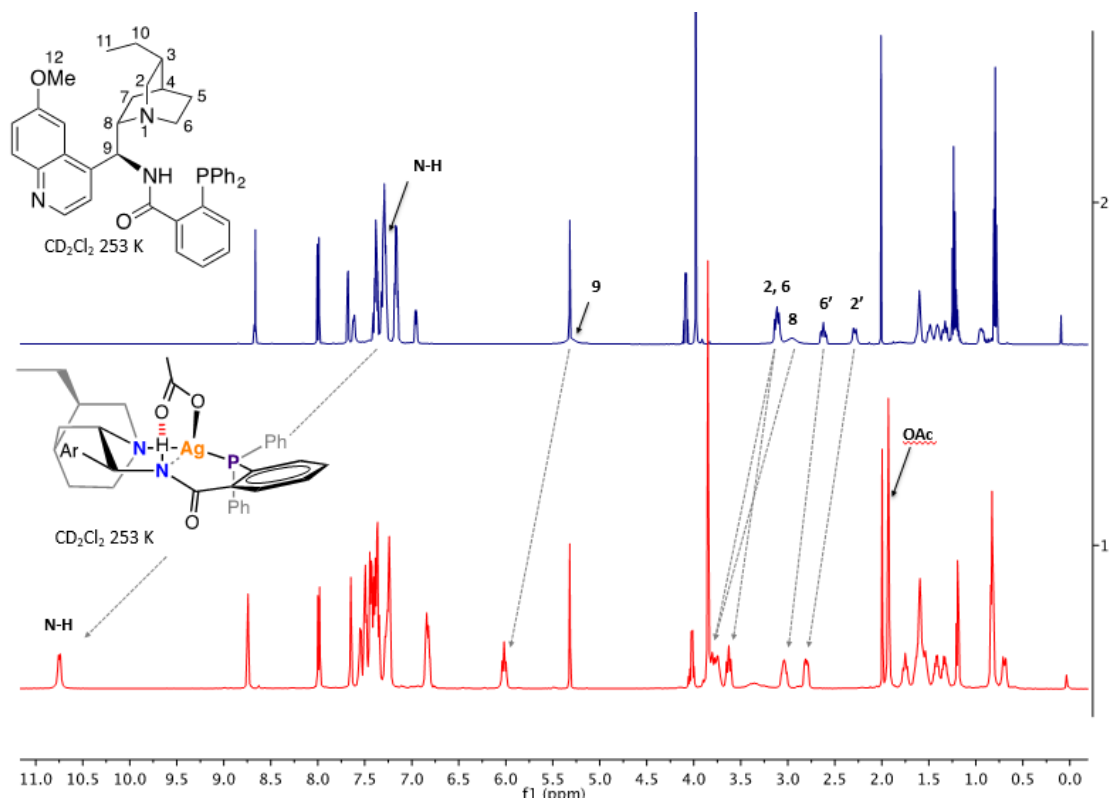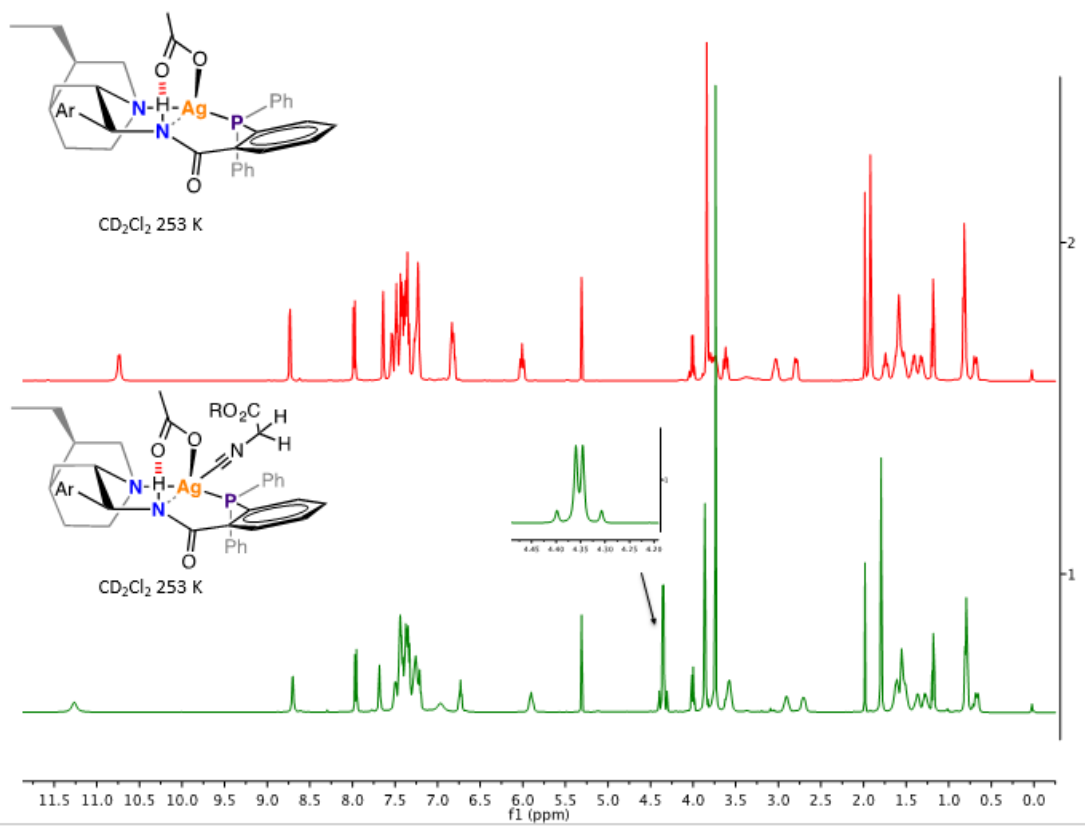

## 6.2 $^{31}\text{P}$ -NMR spectra

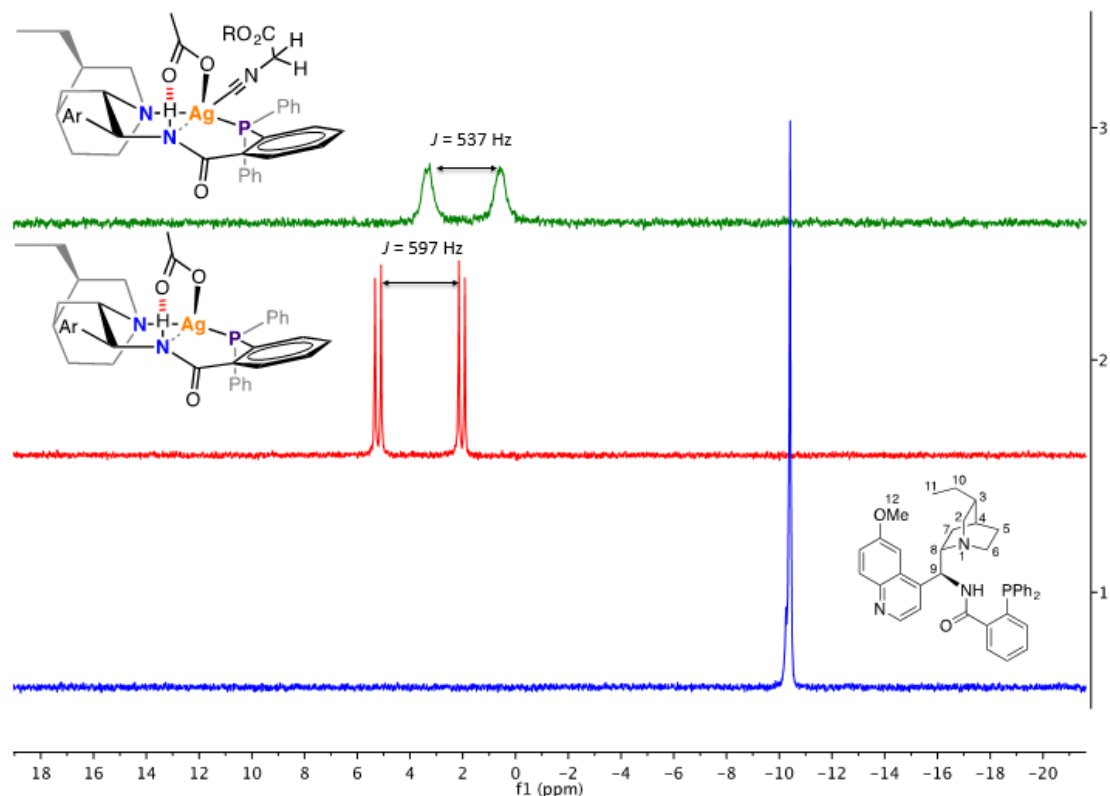

$^{31}\text{P}$  NMR at 253 K (including proposed binding mode) of 1) Free ligand **1a**:  $\delta^{31}\text{P} = -10.4$ ; 2) **1a**·AgOAc:  $\delta^{31}\text{P} = 3.6$ ,  $^1J^{107}\text{Ag}^{31}\text{P} = 597$  Hz; 3) Ligand **1** + 1 eq of AgOAc + 1 eq. of methylisocyanoacetate:  $\delta^{31}\text{P} = 2.0$ ,  $^1J^{107}\text{Ag}^{31}\text{P} = 537$  Hz.

$^{31}\text{P}$  NMR experiments indicated that when **1a** and AgOAc are mixed in a 1:1 ratio, quantitatively binding the silver(I) in solution at  $-20$  °C is observed represented by a downfield shift of the phosphorous signal which is split by  $^1J$  coupling to the two silver isotopes which have marginally different gyromagnetic ratios and exist in roughly equal natural abundance ( $^1J^{107}\text{Ag}^{31}\text{P} = 597$  Hz &  $^1J^{109}\text{Ag}^{31}\text{P} = 690$  Hz) resulting in an apparent double doublet (inset 2, Figure 1.3). Subsequent addition of methyl isocyanoacetate saw a second shift, upfield, with significant broadening of the  $^{31}\text{P}$  signal whilst still indicating the phosphorous was bound to silver (inset 3, Figure 1.3). This may be as a result of the isonitrile unit binding to silver and concomitantly creating a more dynamic species which is not resolvable on the NMR timescale at that temperature. At  $-50$  °C it was possible to marginally sharpen the phosphorous signals but resolution of the two  $^1J^{107/109}\text{Ag}^{31}\text{P}$  couplings was not achieved.





## 8 X-Ray data for the crystal of complex **1a**·AgOAc (CCDC 1493438)

### Crystal growing of complex **1a**·AgOAc

A 1:1 mixture of amino phosphine **1a** and AgOAc was dissolved in degassed CH<sub>2</sub>Cl<sub>2</sub> and filtered through a microfilter to remove residual silver source. This mixture was added to a vial with a small hole in the lid to allow slow diffusion. This vial was placed within a Schlenk tube, hexane was added between the vial and the Schlenk tube, and the Schlenk tube was evacuated and purged with Argon three times. After 4 weeks in the dark at room temperature, several brown crystals of X-ray quality were present on the surface of the glass.

Single crystal X-ray diffraction data were collected at 150 K with an Oxford Diffraction SuperNova diffractometer and processed with CrysAlisPro as per the SI (CIF). The structure was solved with SIR92<sup>16</sup> and refined with CRYSTALS.<sup>17</sup> Full crystallographic data (in CIF format) is available as ESI and can be obtained from The Cambridge Crystallographic Data Centre at [www.ccdc.cam.ac.uk/data\\_request/cif](http://www.ccdc.cam.ac.uk/data_request/cif) (reference number CCDC 1493438).

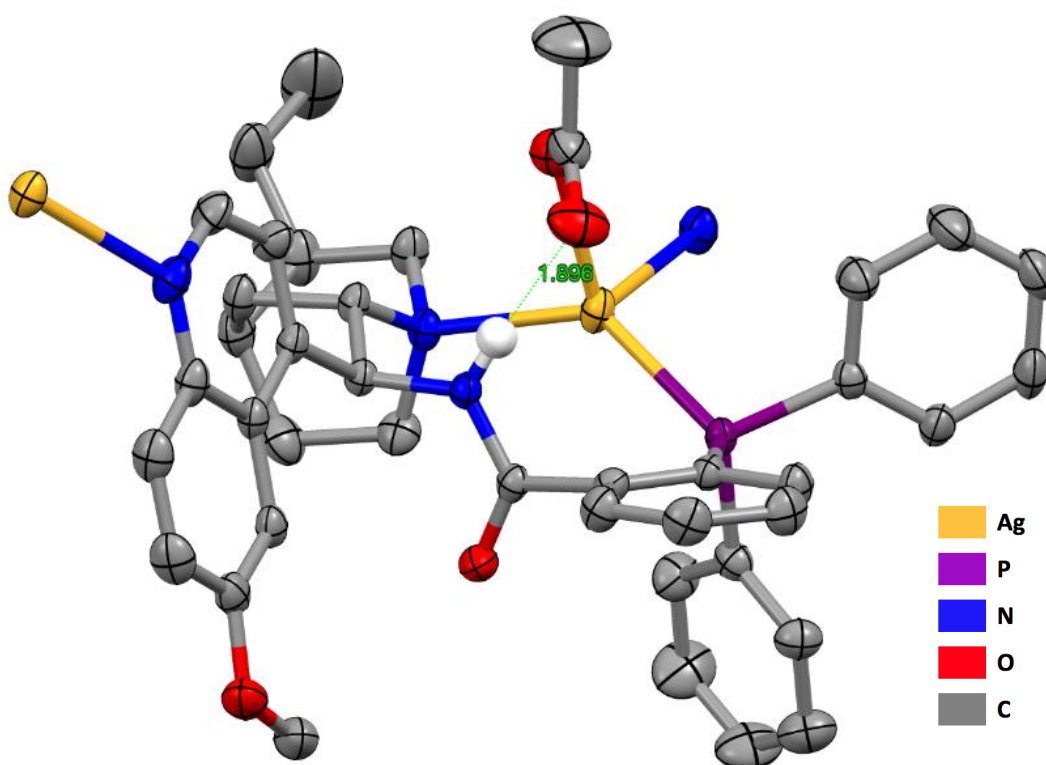

**Figure S1.** Crystal structure of complex **1a**·AgOAc with highlighted intramolecular H-bond.

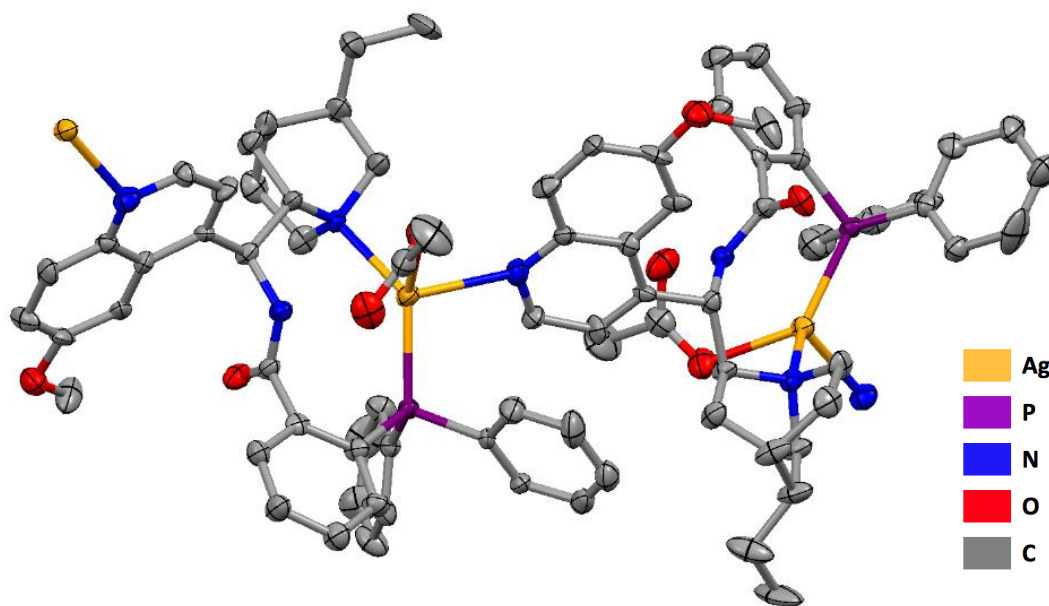

**Figure S2.** Crystal structure of complex **1a**·AgOAc (dimer indicating the polymeric chain structure in the solid state).

Table 1. Crystal data and structure refinement for 6531.

|                                   |                                             |                       |
|-----------------------------------|---------------------------------------------|-----------------------|
| Identification code               | 6531                                        |                       |
| Empirical formula                 | C42.98 H46.96 Ag1 Cl3.96 N3 O4 P1           |                       |
| Formula weight                    | 948.89                                      |                       |
| Temperature                       | 150 K                                       |                       |
| Wavelength                        | 1.54180 Å                                   |                       |
| Crystal system                    | Orthorhombic                                |                       |
| Space group                       | P 21 21 21                                  |                       |
| Unit cell dimensions              | a = 14.0180(1) Å                            | $\alpha = 90^\circ$ . |
|                                   | b = 17.0222(1) Å                            | $\beta = 90^\circ$ .  |
|                                   | c = 19.3743(1) Å                            | $\gamma = 90^\circ$ . |
| Volume                            | 4623.04(5) Å <sup>3</sup>                   |                       |
| Z                                 | 4                                           |                       |
| Density (calculated)              | 1.363 Mg/m <sup>3</sup>                     |                       |
| Absorption coefficient            | 6.267 mm <sup>-1</sup>                      |                       |
| F(000)                            | 1948.787                                    |                       |
| Crystal size                      | 0.38 x 0.15 x 0.10 mm <sup>3</sup>          |                       |
| Theta range for data collection   | 3.456 to 76.352°.                           |                       |
| Index ranges                      | -17<=h<=17, -21<=k<=21, -23<=l<=24          |                       |
| Reflections collected             | 124114                                      |                       |
| Independent reflections           | 9674 [R(int) = 0.051]                       |                       |
| Completeness to theta = 76.352°   | 99.9 %                                      |                       |
| Absorption correction             | Semi-empirical from equivalents             |                       |
| Max. and min. transmission        | 0.53 and 0.30                               |                       |
| Refinement method                 | Full-matrix least-squares on F <sup>2</sup> |                       |
| Data / restraints / parameters    | 9636 / 73 / 547                             |                       |
| Goodness-of-fit on F <sup>2</sup> | 1.0014                                      |                       |
| Final R indices [I>2sigma(I)]     | R1 = 0.0270, wR2 = 0.0709                   |                       |
| R indices (all data)              | R1 = 0.0276, wR2 = 0.0715                   |                       |
| Absolute structure parameter      | -0.017(4)                                   |                       |
| Largest diff. peak and hole       | 0.69 and -0.48 e.Å <sup>-3</sup>            |                       |

Table 2. Atomic coordinates ( $\times 10^4$ ) and equivalent isotropic displacement parameters ( $\text{\AA}^2 \times 10^3$ ) for 6531.  $U(\text{eq})$  is defined as one third of the trace of the orthogonalized  $U^{ij}$  tensor.

|       | x       | y       | z       | $U(\text{eq})$ |
|-------|---------|---------|---------|----------------|
| Ag(1) | 7055(1) | 4725(1) | 5248(1) | 28             |
| P(1)  | 6063(1) | 3643(1) | 4918(1) | 22             |
| C(1)  | 6315(2) | 5246(1) | 6952(1) | 22             |
| C(2)  | 6628(2) | 5165(1) | 7705(1) | 25             |
| C(3)  | 7558(2) | 5265(2) | 7902(1) | 30             |
| C(4)  | 7820(2) | 5156(2) | 8599(1) | 33             |
| N(5)  | 7226(2) | 4957(1) | 9091(1) | 32             |
| C(6)  | 6295(2) | 4833(1) | 8907(1) | 29             |
| C(7)  | 5642(2) | 4588(2) | 9424(1) | 35             |
| C(8)  | 4713(2) | 4439(2) | 9267(1) | 37             |
| C(9)  | 4385(2) | 4537(1) | 8583(1) | 30             |
| C(10) | 4984(2) | 4776(1) | 8069(1) | 26             |
| C(11) | 5959(2) | 4925(1) | 8217(1) | 24             |
| O(12) | 3429(1) | 4394(1) | 8492(1) | 38             |
| C(13) | 3051(2) | 4554(2) | 7826(2) | 46             |
| N(14) | 6676(1) | 5900(1) | 5815(1) | 24             |
| C(15) | 6923(2) | 5847(1) | 6561(1) | 23             |
| C(16) | 6829(2) | 6664(1) | 6909(1) | 30             |
| C(17) | 6431(2) | 7254(2) | 6383(1) | 35             |
| C(18) | 7115(2) | 7340(1) | 5775(1) | 37             |
| C(19) | 7320(2) | 6495(1) | 5504(1) | 31             |
| C(20) | 5676(2) | 6171(2) | 5717(1) | 32             |
| C(21) | 5480(2) | 6941(2) | 6124(2) | 41             |
| C(22) | 8021(3) | 7782(2) | 5948(2) | 55             |
| C(23) | 8646(4) | 7930(3) | 5317(3) | 85             |
| N(24) | 6325(1) | 4452(1) | 6660(1) | 22             |
| C(25) | 5527(2) | 4088(1) | 6447(1) | 22             |
| O(26) | 4735(1) | 4395(1) | 6417(1) | 33             |
| C(27) | 5827(2) | 2947(1) | 5618(1) | 23             |
| C(28) | 5646(2) | 3227(1) | 6284(1) | 23             |
| C(29) | 5504(2) | 2702(2) | 6826(1) | 32             |

|        |         |         |         |     |
|--------|---------|---------|---------|-----|
| C(30)  | 5518(2) | 1903(2) | 6707(1) | 36  |
| C(31)  | 5675(2) | 1616(2) | 6045(2) | 35  |
| C(32)  | 5841(2) | 2135(1) | 5508(1) | 29  |
| C(33)  | 4891(2) | 3804(1) | 4537(1) | 27  |
| C(34)  | 4622(2) | 4569(2) | 4383(2) | 38  |
| C(35)  | 3743(3) | 4716(2) | 4087(2) | 58  |
| C(36)  | 3126(2) | 4108(2) | 3940(2) | 55  |
| C(37)  | 3388(2) | 3342(2) | 4087(2) | 44  |
| C(38)  | 4264(2) | 3192(2) | 4391(1) | 33  |
| C(39)  | 6709(2) | 3045(1) | 4295(1) | 24  |
| C(40)  | 6339(2) | 2759(2) | 3678(1) | 31  |
| C(41)  | 6911(2) | 2309(2) | 3248(1) | 39  |
| C(42)  | 7843(2) | 2158(2) | 3414(2) | 43  |
| C(43)  | 8215(2) | 2442(2) | 4022(2) | 47  |
| C(44)  | 7662(2) | 2889(2) | 4457(1) | 37  |
| C(45)  | 8646(2) | 4095(2) | 6237(2) | 38  |
| O(46)  | 8520(1) | 4664(1) | 5848(1) | 43  |
| O(47)  | 8012(2) | 3654(1) | 6468(1) | 50  |
| C(48)  | 9662(3) | 3916(3) | 6479(3) | 78  |
| C(51)  | 4858(3) | 4051(2) | 1394(2) | 69  |
| Cl(52) | 5127(2) | 3829(2) | 2231(1) | 122 |
| Cl(53) | 4648(3) | 3308(2) | 865(2)  | 74  |
| Cl(54) | 3676(3) | 4182(4) | 1189(3) | 97  |
| C(55)  | 2088(2) | 5060(4) | 787(4)  | 76  |
| Cl(56) | 3183(1) | 5398(2) | 525(2)  | 96  |
| Cl(57) | 2066(2) | 4219(1) | 1280(1) | 75  |
| C(58)  | 3219(4) | 2074(4) | 1990(2) | 120 |
| Cl(59) | 2169(2) | 2064(1) | 1585(1) | 116 |
| Cl(60) | 4147(2) | 1624(2) | 1590(2) | 187 |

---

Table 3. Bond lengths [Å] and angles [°] for 6531.

|              |            |              |          |
|--------------|------------|--------------|----------|
| Ag(1)-N(5)#1 | 2.5164(19) | N(14)-C(19)  | 1.486(3) |
| Ag(1)-P(1)   | 2.3944(6)  | N(14)-C(20)  | 1.488(3) |
| Ag(1)-N(14)  | 2.3419(19) | C(15)-C(16)  | 1.553(3) |
| Ag(1)-N(24)  | 2.9571(18) | C(15)-H(151) | 0.967    |
| Ag(1)-O(46)  | 2.361(2)   | C(16)-C(17)  | 1.536(4) |
| P(1)-C(27)   | 1.831(2)   | C(16)-H(161) | 0.976    |
| P(1)-C(33)   | 1.823(2)   | C(16)-H(162) | 0.960    |
| P(1)-C(39)   | 1.820(2)   | C(17)-C(18)  | 1.526(4) |
| C(1)-C(2)    | 1.528(3)   | C(17)-C(21)  | 1.520(4) |
| C(1)-C(15)   | 1.532(3)   | C(17)-H(171) | 0.977    |
| C(1)-N(24)   | 1.466(3)   | C(18)-C(19)  | 1.558(3) |
| C(1)-H(11)   | 0.966      | C(18)-C(22)  | 1.513(5) |
| C(2)-C(3)    | 1.370(3)   | C(18)-H(181) | 0.981    |
| C(2)-C(11)   | 1.425(3)   | C(19)-H(191) | 0.969    |
| C(3)-C(4)    | 1.410(3)   | C(19)-H(192) | 0.998    |
| C(3)-H(31)   | 0.908      | C(20)-C(21)  | 1.554(4) |
| C(4)-N(5)    | 1.311(3)   | C(20)-H(201) | 0.979    |
| C(4)-H(41)   | 0.949      | C(20)-H(202) | 0.945    |
| N(5)-C(6)    | 1.370(3)   | C(21)-H(211) | 0.959    |
| C(6)-C(7)    | 1.418(3)   | C(21)-H(212) | 0.936    |
| C(6)-C(11)   | 1.425(3)   | C(22)-C(23)  | 1.525(5) |
| C(7)-C(8)    | 1.362(4)   | C(22)-H(221) | 0.995    |
| C(7)-H(71)   | 0.941      | C(22)-H(222) | 0.972    |
| C(8)-C(9)    | 1.412(4)   | C(23)-H(233) | 0.957    |
| C(8)-H(81)   | 0.907      | C(23)-H(232) | 0.954    |
| C(9)-C(10)   | 1.365(3)   | C(23)-H(231) | 0.976    |
| C(9)-O(12)   | 1.373(3)   | N(24)-C(25)  | 1.343(3) |
| C(10)-C(11)  | 1.420(3)   | N(24)-H(241) | 0.861    |
| C(10)-H(101) | 0.927      | C(25)-O(26)  | 1.229(3) |
| O(12)-C(13)  | 1.423(4)   | C(25)-C(28)  | 1.509(3) |
| C(13)-H(133) | 0.959      | C(27)-C(28)  | 1.399(3) |
| C(13)-H(132) | 0.971      | C(27)-C(32)  | 1.398(3) |
| C(13)-H(131) | 0.952      | C(28)-C(29)  | 1.393(3) |
| N(14)-C(15)  | 1.490(3)   | C(29)-C(30)  | 1.379(4) |

|              |          |                    |            |
|--------------|----------|--------------------|------------|
| C(29)-H(291) | 0.946    | C(51)-H(511)       | 0.950      |
| C(30)-C(31)  | 1.390(4) | C(51)-H(512)       | 0.950      |
| C(30)-H(301) | 0.934    | C(51)-Cl(54)       | 1.719(5)   |
| C(31)-C(32)  | 1.384(4) | C(51)-H(513)       | 0.950      |
| C(31)-H(311) | 0.940    | C(51)-H(514)       | 0.950      |
| C(32)-H(321) | 0.930    | C(55)-Cl(56)       | 1.716(5)   |
| C(33)-C(34)  | 1.389(3) | C(55)-Cl(57)       | 1.721(5)   |
| C(33)-C(38)  | 1.391(4) | C(55)-H(551)       | 0.950      |
| C(34)-C(35)  | 1.382(4) | C(55)-H(552)       | 0.950      |
| C(34)-H(341) | 0.940    | C(58)-Cl(59)       | 1.668(5)   |
| C(35)-C(36)  | 1.379(5) | C(58)-Cl(60)       | 1.696(5)   |
| C(35)-H(351) | 0.950    | C(58)-H(581)       | 0.950      |
| C(36)-C(37)  | 1.384(5) | C(58)-H(582)       | 0.950      |
| C(36)-H(361) | 0.914    |                    |            |
| C(37)-C(38)  | 1.386(4) | N(5)#1-Ag(1)-P(1)  | 99.22(5)   |
| C(37)-H(371) | 0.934    | N(5)#1-Ag(1)-N(14) | 108.93(7)  |
| C(38)-H(381) | 0.939    | P(1)-Ag(1)-N(14)   | 130.51(5)  |
| C(39)-C(40)  | 1.392(3) | N(5)#1-Ag(1)-N(24) | 175.06(6)  |
| C(39)-C(44)  | 1.399(4) | P(1)-Ag(1)-N(24)   | 85.69(4)   |
| C(40)-C(41)  | 1.388(4) | N(14)-Ag(1)-N(24)  | 67.81(6)   |
| C(40)-H(401) | 0.958    | N(5)#1-Ag(1)-O(46) | 95.73(7)   |
| C(41)-C(42)  | 1.369(5) | P(1)-Ag(1)-O(46)   | 127.05(6)  |
| C(41)-H(411) | 0.944    | N(14)-Ag(1)-O(46)  | 90.27(7)   |
| C(42)-C(43)  | 1.377(5) | N(24)-Ag(1)-O(46)  | 80.74(6)   |
| C(42)-H(421) | 0.917    | Ag(1)-P(1)-C(27)   | 113.94(7)  |
| C(43)-C(44)  | 1.374(4) | Ag(1)-P(1)-C(33)   | 121.09(8)  |
| C(43)-H(431) | 0.931    | C(27)-P(1)-C(33)   | 103.55(10) |
| C(44)-H(441) | 0.935    | Ag(1)-P(1)-C(39)   | 108.57(8)  |
| C(45)-O(46)  | 1.240(4) | C(27)-P(1)-C(39)   | 102.63(10) |
| C(45)-O(47)  | 1.248(4) | C(33)-P(1)-C(39)   | 105.24(11) |
| C(45)-C(48)  | 1.529(4) | C(2)-C(1)-C(15)    | 111.92(18) |
| C(48)-H(482) | 0.973    | C(2)-C(1)-N(24)    | 106.40(18) |
| C(48)-H(481) | 0.972    | C(15)-C(1)-N(24)   | 114.76(17) |
| C(48)-H(483) | 0.953    | C(2)-C(1)-H(11)    | 108.9      |
| C(51)-Cl(52) | 1.706(3) | C(15)-C(1)-H(11)   | 108.0      |
| C(51)-Cl(53) | 1.655(4) | N(24)-C(1)-H(11)   | 106.6      |



|                     |            |                     |            |
|---------------------|------------|---------------------|------------|
| C(1)-C(2)-C(3)      | 121.9(2)   | H(132)-C(13)-H(131) | 109.1      |
| C(1)-C(2)-C(11)     | 120.1(2)   | Ag(1)-N(14)-C(15)   | 110.48(13) |
| C(3)-C(2)-C(11)     | 117.8(2)   | Ag(1)-N(14)-C(19)   | 104.75(14) |
| C(2)-C(3)-C(4)      | 119.9(2)   | C(15)-N(14)-C(19)   | 107.05(18) |
| C(2)-C(3)-H(31)     | 121.0      | Ag(1)-N(14)-C(20)   | 114.81(15) |
| C(4)-C(3)-H(31)     | 119.1      | C(15)-N(14)-C(20)   | 111.23(18) |
| C(3)-C(4)-N(5)      | 124.5(2)   | C(19)-N(14)-C(20)   | 108.00(19) |
| C(3)-C(4)-H(41)     | 119.5      | C(1)-C(15)-N(14)    | 113.05(17) |
| N(5)-C(4)-H(41)     | 116.0      | C(1)-C(15)-C(16)    | 109.62(18) |
| Ag(1)#2-N(5)-C(4)   | 109.83(16) | N(14)-C(15)-C(16)   | 110.31(18) |
| Ag(1)#2-N(5)-C(6)   | 130.28(16) | C(1)-C(15)-H(151)   | 106.8      |
| C(4)-N(5)-C(6)      | 117.0(2)   | N(14)-C(15)-H(151)  | 103.8      |
| N(5)-C(6)-C(7)      | 118.4(2)   | C(16)-C(15)-H(151)  | 113.2      |
| N(5)-C(6)-C(11)     | 122.8(2)   | C(15)-C(16)-C(17)   | 109.21(19) |
| C(7)-C(6)-C(11)     | 118.8(2)   | C(15)-C(16)-H(161)  | 109.5      |
| C(6)-C(7)-C(8)      | 121.0(2)   | C(17)-C(16)-H(161)  | 110.5      |
| C(6)-C(7)-H(71)     | 117.5      | C(15)-C(16)-H(162)  | 109.5      |
| C(8)-C(7)-H(71)     | 121.5      | C(17)-C(16)-H(162)  | 109.7      |
| C(7)-C(8)-C(9)      | 119.9(2)   | H(161)-C(16)-H(162) | 108.4      |
| C(7)-C(8)-H(81)     | 120.5      | C(16)-C(17)-C(18)   | 110.3(2)   |
| C(9)-C(8)-H(81)     | 119.6      | C(16)-C(17)-C(21)   | 108.0(2)   |
| C(8)-C(9)-C(10)     | 121.3(2)   | C(18)-C(17)-C(21)   | 109.3(2)   |
| C(8)-C(9)-O(12)     | 114.7(2)   | C(16)-C(17)-H(171)  | 109.3      |
| C(10)-C(9)-O(12)    | 124.0(2)   | C(18)-C(17)-H(171)  | 109.8      |
| C(9)-C(10)-C(11)    | 119.9(2)   | C(21)-C(17)-H(171)  | 110.2      |
| C(9)-C(10)-H(101)   | 119.4      | C(17)-C(18)-C(19)   | 106.71(19) |
| C(11)-C(10)-H(101)  | 120.7      | C(17)-C(18)-C(22)   | 113.8(2)   |
| C(6)-C(11)-C(2)     | 117.9(2)   | C(19)-C(18)-C(22)   | 112.3(3)   |
| C(6)-C(11)-C(10)    | 119.2(2)   | C(17)-C(18)-H(181)  | 107.6      |
| C(2)-C(11)-C(10)    | 122.9(2)   | C(19)-C(18)-H(181)  | 108.9      |
| C(9)-O(12)-C(13)    | 116.6(2)   | C(22)-C(18)-H(181)  | 107.3      |
| O(12)-C(13)-H(133)  | 107.8      | C(18)-C(19)-N(14)   | 112.4(2)   |
| O(12)-C(13)-H(132)  | 110.7      | C(18)-C(19)-H(191)  | 110.0      |
| H(133)-C(13)-H(132) | 107.5      | N(14)-C(19)-H(191)  | 106.3      |
| O(12)-C(13)-H(131)  | 112.0      | C(18)-C(19)-H(192)  | 110.2      |
| H(133)-C(13)-H(131) | 109.6      | N(14)-C(19)-H(192)  | 108.9      |

|                     |            |                    |            |
|---------------------|------------|--------------------|------------|
| H(191)-C(19)-H(192) | 109.0      | C(28)-C(27)-C(32)  | 118.7(2)   |
| N(14)-C(20)-C(21)   | 111.3(2)   | C(25)-C(28)-C(27)  | 123.0(2)   |
| N(14)-C(20)-H(201)  | 109.2      | C(25)-C(28)-C(29)  | 116.7(2)   |
| C(21)-C(20)-H(201)  | 110.6      | C(27)-C(28)-C(29)  | 120.2(2)   |
| N(14)-C(20)-H(202)  | 107.1      | C(28)-C(29)-C(30)  | 120.3(2)   |
| C(21)-C(20)-H(202)  | 111.2      | C(28)-C(29)-H(291) | 118.8      |
| H(201)-C(20)-H(202) | 107.3      | C(30)-C(29)-H(291) | 120.9      |
| C(20)-C(21)-C(17)   | 108.0(2)   | C(29)-C(30)-C(31)  | 120.2(2)   |
| C(20)-C(21)-H(211)  | 110.9      | C(29)-C(30)-H(301) | 120.9      |
| C(17)-C(21)-H(211)  | 111.7      | C(31)-C(30)-H(301) | 118.8      |
| C(20)-C(21)-H(212)  | 109.3      | C(30)-C(31)-C(32)  | 119.7(2)   |
| C(17)-C(21)-H(212)  | 108.7      | C(30)-C(31)-H(311) | 120.3      |
| H(211)-C(21)-H(212) | 108.3      | C(32)-C(31)-H(311) | 120.0      |
| C(18)-C(22)-C(23)   | 112.7(3)   | C(27)-C(32)-C(31)  | 120.9(2)   |
| C(18)-C(22)-H(221)  | 109.4      | C(27)-C(32)-H(321) | 119.9      |
| C(23)-C(22)-H(221)  | 108.4      | C(31)-C(32)-H(321) | 119.2      |
| C(18)-C(22)-H(222)  | 107.0      | P(1)-C(33)-C(34)   | 118.2(2)   |
| C(23)-C(22)-H(222)  | 110.7      | P(1)-C(33)-C(38)   | 122.64(19) |
| H(221)-C(22)-H(222) | 108.5      | C(34)-C(33)-C(38)  | 119.1(2)   |
| C(22)-C(23)-H(233)  | 107.5      | C(33)-C(34)-C(35)  | 120.1(3)   |
| C(22)-C(23)-H(232)  | 111.1      | C(33)-C(34)-H(341) | 119.1      |
| H(233)-C(23)-H(232) | 109.1      | C(35)-C(34)-H(341) | 120.8      |
| C(22)-C(23)-H(231)  | 110.9      | C(34)-C(35)-C(36)  | 120.6(3)   |
| H(233)-C(23)-H(231) | 107.8      | C(34)-C(35)-H(351) | 120.7      |
| H(232)-C(23)-H(231) | 110.3      | C(36)-C(35)-H(351) | 118.7      |
| C(1)-N(24)-Ag(1)    | 102.46(12) | C(35)-C(36)-C(37)  | 120.0(3)   |
| C(1)-N(24)-C(25)    | 122.44(19) | C(35)-C(36)-H(361) | 120.0      |
| Ag(1)-N(24)-C(25)   | 94.42(13)  | C(37)-C(36)-H(361) | 120.0      |
| C(1)-N(24)-H(241)   | 118.8      | C(36)-C(37)-C(38)  | 119.6(3)   |
| Ag(1)-N(24)-H(241)  | 74.7       | C(36)-C(37)-H(371) | 120.0      |
| C(25)-N(24)-H(241)  | 118.7      | C(38)-C(37)-H(371) | 120.3      |
| N(24)-C(25)-O(26)   | 124.8(2)   | C(33)-C(38)-C(37)  | 120.6(3)   |
| N(24)-C(25)-C(28)   | 114.87(19) | C(33)-C(38)-H(381) | 119.1      |
| O(26)-C(25)-C(28)   | 120.2(2)   | C(37)-C(38)-H(381) | 120.2      |
| P(1)-C(27)-C(28)    | 119.62(17) | P(1)-C(39)-C(40)   | 125.48(19) |
| P(1)-C(27)-C(32)    | 121.67(18) | P(1)-C(39)-C(44)   | 115.64(19) |

|                    |            |                     |           |
|--------------------|------------|---------------------|-----------|
| C(40)-C(39)-C(44)  | 118.9(2)   | H(482)-C(48)-H(481) | 109.4     |
| C(39)-C(40)-C(41)  | 119.5(3)   | C(45)-C(48)-H(483)  | 109.5     |
| C(39)-C(40)-H(401) | 119.2      | H(482)-C(48)-H(483) | 108.2     |
| C(41)-C(40)-H(401) | 121.2      | H(481)-C(48)-H(483) | 108.0     |
| C(40)-C(41)-C(42)  | 120.9(3)   | Cl(53)-C(51)-H(511) | 107.7     |
| C(40)-C(41)-H(411) | 119.2      | Cl(53)-C(51)-H(512) | 107.3     |
| C(42)-C(41)-H(411) | 119.9      | H(511)-C(51)-H(512) | 109.5     |
| C(41)-C(42)-C(43)  | 119.8(3)   | Cl(54)-C(51)-H(513) | 107.7     |
| C(41)-C(42)-H(421) | 119.9      | Cl(54)-C(51)-H(514) | 107.3     |
| C(43)-C(42)-H(421) | 120.2      | H(513)-C(51)-H(514) | 109.5     |
| C(42)-C(43)-C(44)  | 120.4(3)   | Cl(56)-C(55)-Cl(57) | 117.36(7) |
| C(42)-C(43)-H(431) | 120.9      | Cl(56)-C(55)-H(551) | 107.5     |
| C(44)-C(43)-H(431) | 118.8      | Cl(57)-C(55)-H(551) | 107.5     |
| C(39)-C(44)-C(43)  | 120.4(3)   | Cl(56)-C(55)-H(552) | 107.5     |
| C(39)-C(44)-H(441) | 118.8      | Cl(57)-C(55)-H(552) | 107.5     |
| C(43)-C(44)-H(441) | 120.7      | H(551)-C(55)-H(552) | 109.5     |
| O(46)-C(45)-O(47)  | 125.9(3)   | Cl(59)-C(58)-Cl(60) | 117.20(7) |
| O(46)-C(45)-C(48)  | 118.4(3)   | Cl(59)-C(58)-H(581) | 107.5     |
| O(47)-C(45)-C(48)  | 115.7(3)   | Cl(60)-C(58)-H(581) | 107.5     |
| Ag(1)-O(46)-C(45)  | 117.24(19) | Cl(59)-C(58)-H(582) | 107.5     |
| C(45)-C(48)-H(482) | 112.8      | Cl(60)-C(58)-H(582) | 107.5     |
| C(45)-C(48)-H(481) | 108.8      | H(581)-C(58)-H(582) | 109.5     |

---

Symmetry transformations used to generate equivalent atoms:

#1  $-x+3/2, -y+1, z-1/2$     #2  $-x+3/2, -y+1, z+1/2$

Table 4. Anisotropic displacement parameters ( $\text{\AA}^2 \times 10^3$ ) for 6531. The anisotropic displacement factor exponent takes the form:  $-2\pi^2 [ h^2 a^{*2} U^{11} + \dots + 2 h k a^* b^* U^{12} ]$

|       | $U^{11}$ | $U^{22}$ | $U^{33}$ | $U^{23}$ | $U^{13}$ | $U^{12}$ |
|-------|----------|----------|----------|----------|----------|----------|
| Ag(1) | 39(1)    | 25(1)    | 20(1)    | -2(1)    | 2(1)     | -6(1)    |
| P(1)  | 26(1)    | 20(1)    | 19(1)    | -1(1)    | 2(1)     | 0(1)     |
| C(1)  | 26(1)    | 21(1)    | 20(1)    | -2(1)    | 0(1)     | -1(1)    |
| C(2)  | 33(1)    | 23(1)    | 19(1)    | -4(1)    | 1(1)     | -4(1)    |
| C(3)  | 32(1)    | 38(1)    | 21(1)    | 0(1)     | 1(1)     | -10(1)   |
| C(4)  | 38(1)    | 38(1)    | 24(1)    | -3(1)    | -6(1)    | -6(1)    |
| N(5)  | 42(1)    | 33(1)    | 21(1)    | 0(1)     | -5(1)    | -6(1)    |
| C(6)  | 42(1)    | 21(1)    | 23(1)    | -1(1)    | 1(1)     | -4(1)    |
| C(7)  | 50(1)    | 30(1)    | 23(1)    | 3(1)     | 4(1)     | -5(1)    |
| C(8)  | 49(2)    | 31(1)    | 31(1)    | 6(1)     | 12(1)    | -4(1)    |
| C(9)  | 33(1)    | 21(1)    | 36(1)    | -4(1)    | 7(1)     | -3(1)    |
| C(10) | 33(1)    | 19(1)    | 25(1)    | -4(1)    | 4(1)     | -2(1)    |
| C(11) | 33(1)    | 19(1)    | 21(1)    | -3(1)    | 3(1)     | -2(1)    |
| O(12) | 32(1)    | 38(1)    | 44(1)    | -4(1)    | 9(1)     | -7(1)    |
| C(13) | 33(1)    | 60(2)    | 46(2)    | -18(1)   | 5(1)     | -8(1)    |
| N(14) | 33(1)    | 22(1)    | 19(1)    | 1(1)     | 1(1)     | -2(1)    |
| C(15) | 30(1)    | 21(1)    | 18(1)    | -2(1)    | 0(1)     | -3(1)    |
| C(16) | 42(1)    | 23(1)    | 26(1)    | -4(1)    | 5(1)     | -7(1)    |
| C(17) | 47(2)    | 23(1)    | 36(1)    | -4(1)    | 7(1)     | 1(1)     |
| C(18) | 56(2)    | 22(1)    | 33(1)    | 2(1)     | 8(1)     | -3(1)    |
| C(19) | 44(1)    | 23(1)    | 25(1)    | 0(1)     | 6(1)     | -7(1)    |
| C(20) | 37(1)    | 31(1)    | 29(1)    | 3(1)     | -6(1)    | 3(1)     |
| C(21) | 43(2)    | 36(1)    | 46(2)    | -2(1)    | 2(1)     | 12(1)    |
| C(22) | 70(2)    | 41(2)    | 56(2)    | -15(1)   | 23(2)    | -25(2)   |
| C(23) | 100(3)   | 76(3)    | 80(3)    | -14(2)   | 44(3)    | -50(3)   |
| N(24) | 24(1)    | 21(1)    | 19(1)    | -2(1)    | 1(1)     | -1(1)    |
| C(25) | 28(1)    | 23(1)    | 16(1)    | -1(1)    | 1(1)     | -3(1)    |
| O(26) | 25(1)    | 35(1)    | 39(1)    | -10(1)   | -4(1)    | 1(1)     |
| C(27) | 24(1)    | 22(1)    | 24(1)    | -2(1)    | 1(1)     | -1(1)    |
| C(28) | 23(1)    | 25(1)    | 22(1)    | 0(1)     | -2(1)    | -4(1)    |
| C(29) | 38(1)    | 32(1)    | 25(1)    | 1(1)     | 1(1)     | -5(1)    |

|        |        |        |        |        |        |        |
|--------|--------|--------|--------|--------|--------|--------|
| C(30)  | 44(1)  | 31(1)  | 32(1)  | 10(1)  | 4(1)   | -6(1)  |
| C(31)  | 43(1)  | 22(1)  | 39(1)  | 3(1)   | 2(1)   | -2(1)  |
| C(32)  | 36(1)  | 20(1)  | 30(1)  | -3(1)  | 3(1)   | -2(1)  |
| C(33)  | 28(1)  | 30(1)  | 23(1)  | 2(1)   | 3(1)   | 2(1)   |
| C(34)  | 42(1)  | 28(1)  | 45(2)  | 5(1)   | -8(1)  | 3(1)   |
| C(35)  | 60(2)  | 40(2)  | 74(2)  | 14(2)  | -21(2) | 12(2)  |
| C(36)  | 41(2)  | 56(2)  | 67(2)  | 18(2)  | -17(2) | 5(1)   |
| C(37)  | 35(1)  | 49(2)  | 49(2)  | 10(1)  | -5(1)  | -7(1)  |
| C(38)  | 30(1)  | 32(1)  | 37(1)  | 6(1)   | 0(1)   | -1(1)  |
| C(39)  | 29(1)  | 22(1)  | 21(1)  | 0(1)   | 4(1)   | -1(1)  |
| C(40)  | 35(1)  | 30(1)  | 28(1)  | -6(1)  | 4(1)   | -7(1)  |
| C(41)  | 54(2)  | 35(1)  | 29(1)  | -11(1) | 10(1)  | -10(1) |
| C(42)  | 46(2)  | 39(1)  | 44(2)  | -7(1)  | 17(1)  | 6(1)   |
| C(43)  | 36(2)  | 57(2)  | 47(2)  | -6(1)  | 5(1)   | 14(1)  |
| C(44)  | 34(1)  | 46(2)  | 31(1)  | -5(1)  | 0(1)   | 6(1)   |
| C(45)  | 33(1)  | 39(1)  | 41(2)  | -8(1)  | 1(1)   | 9(1)   |
| O(46)  | 41(1)  | 50(1)  | 38(1)  | 5(1)   | 1(1)   | -1(1)  |
| O(47)  | 40(1)  | 42(1)  | 69(1)  | 14(1)  | 1(1)   | 9(1)   |
| C(48)  | 40(2)  | 78(3)  | 115(4) | 13(3)  | -14(2) | 15(2)  |
| C(51)  | 63(3)  | 79(4)  | 66(3)  | 18(2)  | -7(3)  | -13(3) |
| CI(52) | 132(2) | 151(3) | 83(1)  | 48(2)  | -49(1) | -86(2) |
| CI(53) | 94(2)  | 59(2)  | 69(2)  | 17(1)  | 16(2)  | -6(1)  |
| CI(54) | 62(2)  | 130(5) | 100(4) | 45(3)  | -9(2)  | -21(2) |
| C(55)  | 53(3)  | 109(5) | 66(4)  | 17(4)  | 15(4)  | 9(3)   |
| CI(56) | 51(1)  | 97(2)  | 139(2) | 27(2)  | 10(1)  | 6(1)   |
| CI(57) | 71(1)  | 69(1)  | 85(1)  | -5(1)  | 2(1)   | 9(1)   |
| C(58)  | 170(4) | 115(5) | 76(4)  | 31(4)  | 11(3)  | -34(4) |
| CI(59) | 162(2) | 106(1) | 80(1)  | -17(1) | 16(1)  | -35(1) |
| CI(60) | 151(2) | 261(4) | 150(2) | -55(2) | 65(2)  | -90(2) |

---

Table 5. Hydrogen coordinates ( $\times 10^4$ ) and isotropic displacement parameters ( $\text{\AA}^2 \times 10^{-3}$ ) for 6531.

|        | x    | y    | z    | U(eq) |
|--------|------|------|------|-------|
| H(11)  | 5660 | 5423 | 6940 | 27    |
| H(31)  | 8010 | 5412 | 7593 | 37    |
| H(41)  | 8467 | 5219 | 8731 | 39    |
| H(71)  | 5872 | 4547 | 9879 | 42    |
| H(81)  | 4298 | 4287 | 9600 | 43    |
| H(101) | 4750 | 4831 | 7624 | 31    |
| H(133) | 2388 | 4414 | 7830 | 68    |
| H(132) | 3091 | 5111 | 7722 | 68    |
| H(131) | 3371 | 4267 | 7474 | 69    |
| H(151) | 7569 | 5648 | 6560 | 26    |
| H(161) | 7452 | 6835 | 7076 | 37    |
| H(162) | 6404 | 6627 | 7296 | 38    |
| H(171) | 6342 | 7763 | 6607 | 42    |
| H(181) | 6784 | 7638 | 5414 | 45    |
| H(191) | 7963 | 6339 | 5626 | 36    |
| H(192) | 7251 | 6478 | 4991 | 37    |
| H(201) | 5238 | 5755 | 5864 | 38    |
| H(202) | 5584 | 6246 | 5238 | 38    |
| H(211) | 5043 | 6849 | 6496 | 51    |
| H(212) | 5210 | 7314 | 5827 | 50    |
| H(221) | 7854 | 8298 | 6157 | 66    |
| H(222) | 8362 | 7472 | 6290 | 66    |
| H(233) | 9186 | 8229 | 5466 | 128   |
| H(232) | 8309 | 8220 | 4974 | 128   |
| H(231) | 8879 | 7436 | 5125 | 128   |
| H(291) | 5382 | 2904 | 7272 | 38    |
| H(301) | 5398 | 1547 | 7063 | 43    |
| H(311) | 5668 | 1072 | 5961 | 41    |
| H(321) | 5970 | 1938 | 5070 | 34    |
| H(341) | 5039 | 4983 | 4492 | 47    |

|        |       |      |      |     |
|--------|-------|------|------|-----|
| H(351) | 3542  | 5239 | 3996 | 70  |
| H(361) | 2548  | 4209 | 3741 | 66  |
| H(371) | 2976  | 2928 | 3979 | 53  |
| H(381) | 4437  | 2677 | 4510 | 40  |
| H(401) | 5699  | 2893 | 3550 | 38  |
| H(411) | 6655  | 2113 | 2831 | 47  |
| H(421) | 8211  | 1858 | 3126 | 53  |
| H(431) | 8844  | 2337 | 4147 | 56  |
| H(441) | 7918  | 3098 | 4863 | 44  |
| H(482) | 9758  | 3364 | 6589 | 117 |
| H(481) | 9799  | 4234 | 6884 | 117 |
| H(483) | 10103 | 4058 | 6126 | 117 |
| H(241) | 6858  | 4201 | 6640 | 26  |
| H(511) | 5376  | 4343 | 1210 | 83  |
| H(512) | 4302  | 4369 | 1399 | 83  |
| H(513) | 5187  | 4521 | 1278 | 83  |
| H(514) | 5090  | 3632 | 1117 | 83  |
| H(551) | 1796  | 5466 | 1050 | 92  |
| H(552) | 1720  | 4962 | 385  | 92  |
| H(581) | 3392  | 2608 | 2058 | 145 |
| H(582) | 3134  | 1826 | 2424 | 145 |

---

Table 6. Hydrogen bonds for 6531 [Å and °].

| D-H...A                | d(D-H) | d(H...A) | d(D...A) | <(DHA) |
|------------------------|--------|----------|----------|--------|
| C(7)-H(71)...O(46)#2   | 0.94   | 2.46     | 3.258(4) | 142    |
| C(10)-H(101)...O(26)   | 0.93   | 2.45     | 3.284(4) | 149    |
| C(15)-H(151)...O(46)   | 0.97   | 2.55     | 3.312(4) | 136    |
| N(24)-H(241)...O(47)   | 0.86   | 1.90     | 2.752(4) | 172    |
| C(51)-H(511)...O(46)#1 | 0.95   | 2.40     | 3.328(4) | 167    |
| C(51)-H(513)...O(46)#1 | 0.95   | 2.43     | 3.328(4) | 157    |
| C(55)-H(551)...O(26)#3 | 0.95   | 2.27     | 2.980(4) | 131    |
| C(58)-H(582)...O(47)#4 | 0.95   | 2.30     | 3.248(4) | 174    |

Symmetry transformations used to generate equivalent atoms:

#1  $-x+3/2, -y+1, z-1/2$  #2  $-x+3/2, -y+1, z+1/2$  #3  $-x+1/2, -y+1, z-1/2$

#4  $x-1/2, -y+1/2, -z+1$



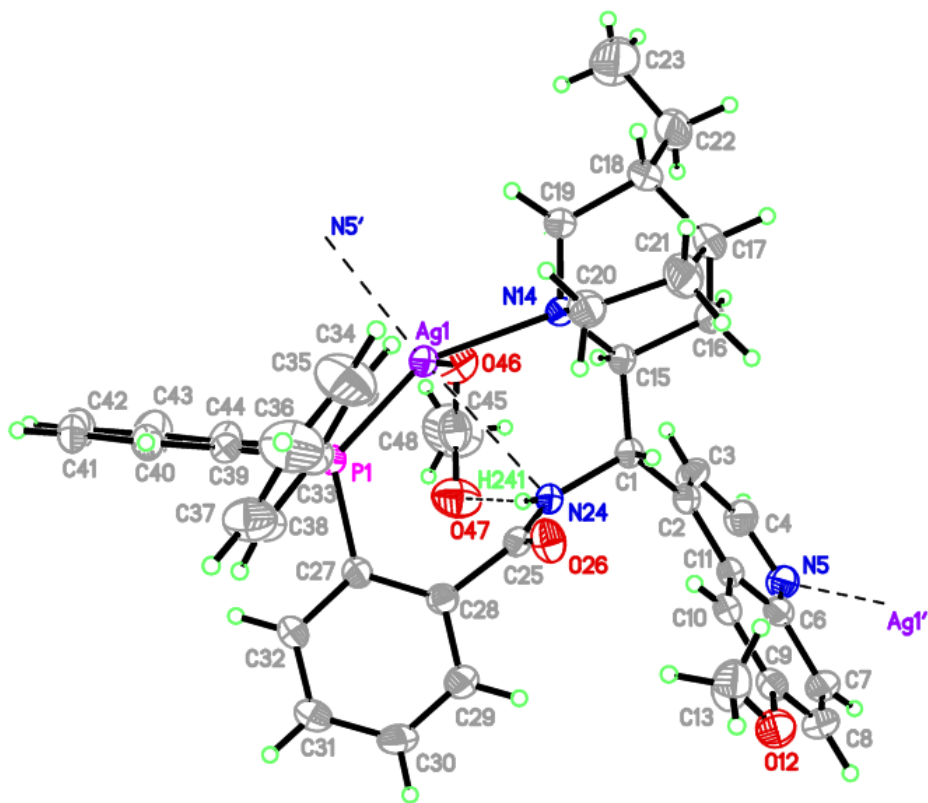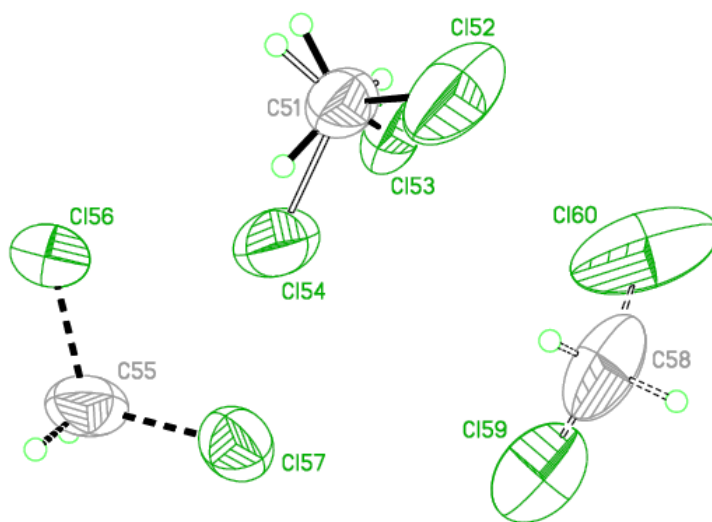

Supplement: c6cc04132a1.pdf [file c6cc04132a1.pdf]
